# Supplementary material for: In vitro and computational investigations of novel synthetic carboxamide-linked pyridopyrrolopyrimidines with potent activity as SARS-CoV-2-MPro inhibitors
Source: PubMed Central journal article supplement — RSC Adv. 2022 Sep 22;12(41):26895–907. doi: 10.1039/d2ra04015h (PMC9494209; doi:10.1039/d2ra04015h), 2022-09-22
Supplement: RA-012-D2RA04015H-s001.pdf [file RA-012-D2RA04015H-s001.pdf]

***In vitro* and computational investigations of novel synthetic carboxamide-linked pyridopyrrolopyrimidines with potent activity as SARS-CoV-2-M<sup>Pro</sup> inhibitors**

**Supporting Information**

**Contents**

|     |                                                                    |    |
|-----|--------------------------------------------------------------------|----|
| 1   | <sup>1</sup> H NMR Spectral Data of New Compounds.....             | 2  |
| 1.1 | Spectral data of 21 .....                                          | 2  |
| 1.2 | Spectral data of 22 .....                                          | 4  |
| 1.3 | Spectral data of 23 .....                                          | 6  |
| 1.4 | Spectral data of 24 .....                                          | 8  |
| 1.5 | Spectral data of 25 .....                                          | 9  |
| 1.6 | Spectral data of 26 .....                                          | 10 |
| 1.7 | Spectral data of 27 .....                                          | 12 |
| 1.8 | Spectral data of 28 .....                                          | 13 |
| 1.9 | Spectral data of 29 .....                                          | 14 |
| 2   | Raw Data of Results of Biological Evaluation Studies.....          | 15 |
| 2.1 | COV19 Antiviral report (EC <sub>50</sub> ).....                    | 15 |
| 2.2 | SARS-CoV-2-M <sup>Pro</sup> inhibition assay(GC376) .....          | 36 |
| 2.3 | SARS-CoV-2-M <sup>Pro</sup> inhibition assay (Lopinavir) .....     | 38 |
| 2.4 | SARS-CoV-2-M <sup>Pro</sup> inhibition assay of new compounds..... | 40 |
| 2.5 | Vero cells Cytotoxicity Assay .....                                | 47 |
| 3   | Docking studies .....                                              | 54 |

# 1 <sup>1</sup>H NMR Spectral Data of New Compounds

## 1.1 Spectral data of 21

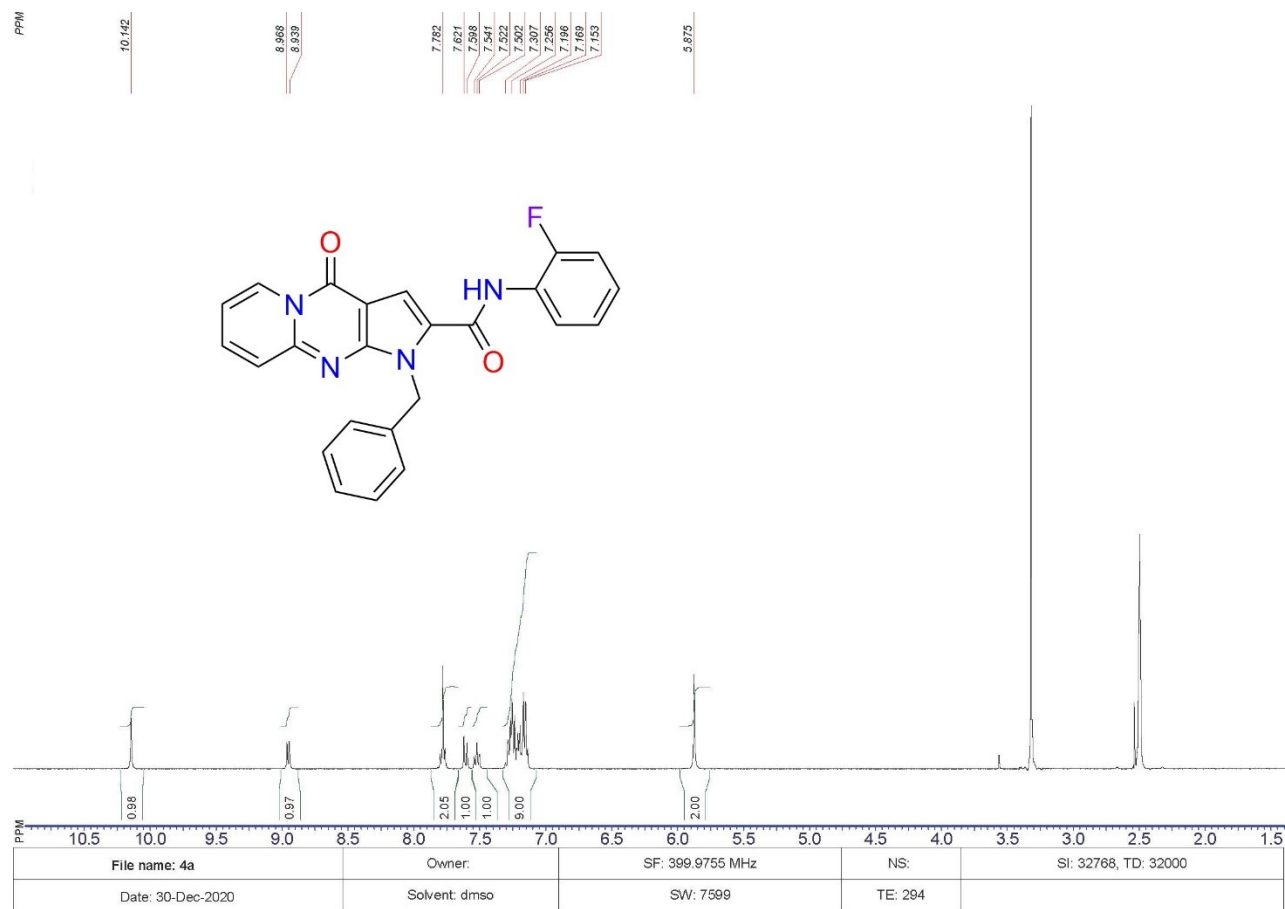

NOVA 500 MHz Ultra Shield

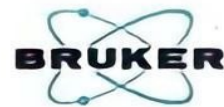

130 (4a)

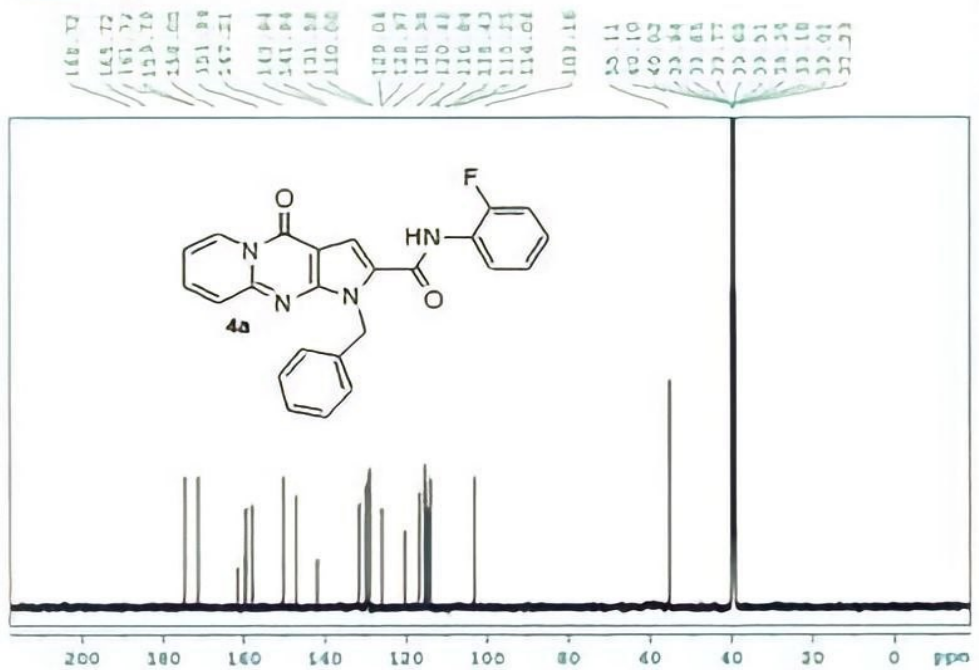

| Chemical Shift (ppm) | Assignment |
|----------------------|------------|
| 183.72               |            |
| 165.72               |            |
| 161.77               |            |
| 153.10               |            |
| 152.62               |            |
| 151.89               |            |
| 147.31               |            |
| 141.84               |            |
| 131.28               |            |
| 110.00               |            |
| 109.04               |            |
| 128.87               |            |
| 120.28               |            |
| 120.42               |            |
| 116.84               |            |
| 115.43               |            |
| 115.21               |            |
| 114.04               |            |
| 107.16               |            |
| 52.11                |            |
| 49.10                |            |
| 46.07                |            |
| 35.84                |            |
| 33.65                |            |
| 33.77                |            |
| 32.63                |            |
| 33.51                |            |
| 33.38                |            |
| 32.18                |            |
| 32.01                |            |
| 31.55                |            |

## 1.2 Spectral data of 22

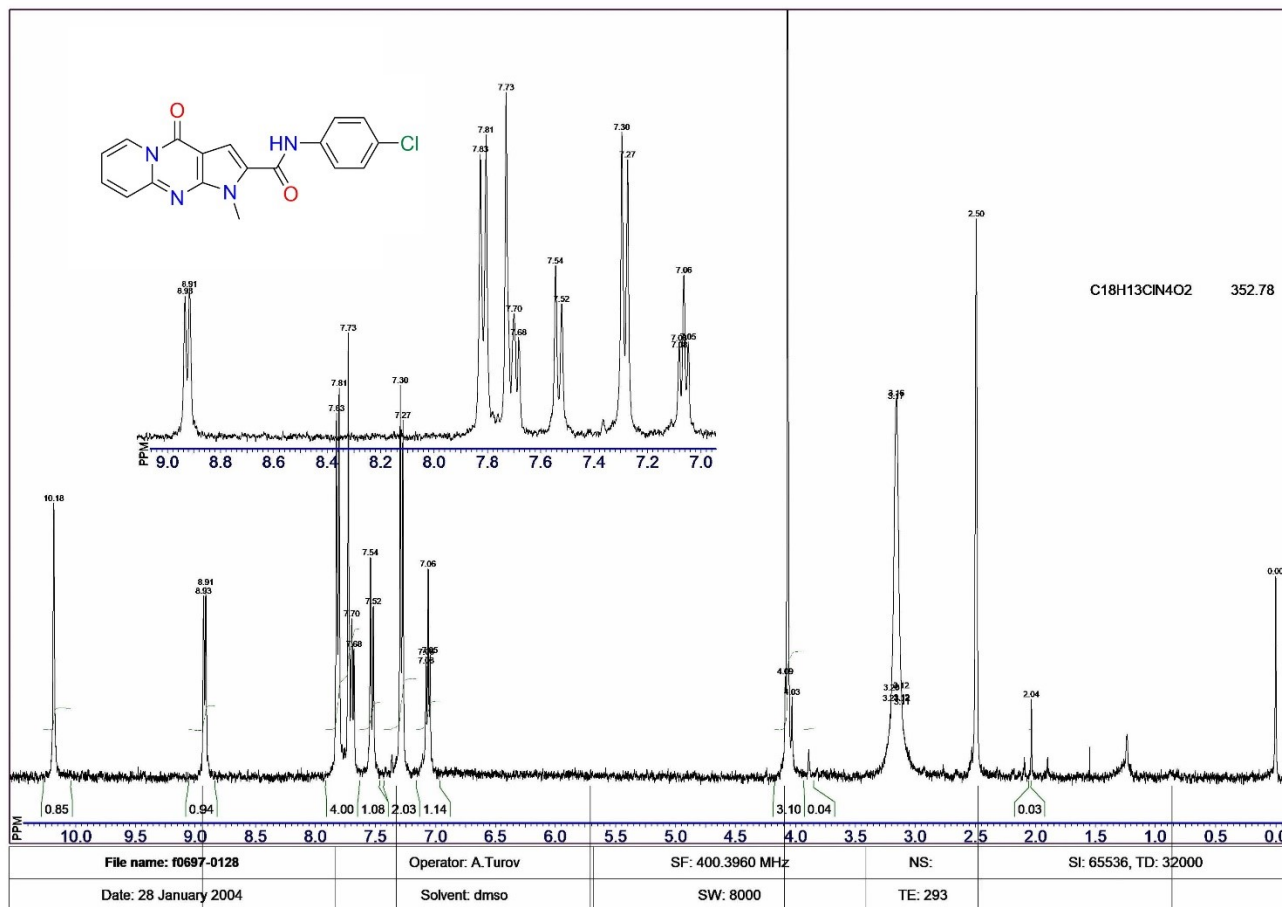

NMR 500 MHz Ultra Shield™

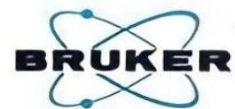

13C (4b)

- 169.74
- 168.17
- 162.74
- 160.17
- 147.24
- 144.70
- 131.56
- 131.11
- 130.03
- 129.23
- 128.60
- 128.29
- 125.97
- 120.37
- 116.86
- 114.40
- 114.03
- 103.11
- 40.10
- 40.01
- 39.93
- 39.84
- 39.76
- 39.67
- 39.60
- 39.51
- 39.34
- 39.17
- 39.01
- 37.32

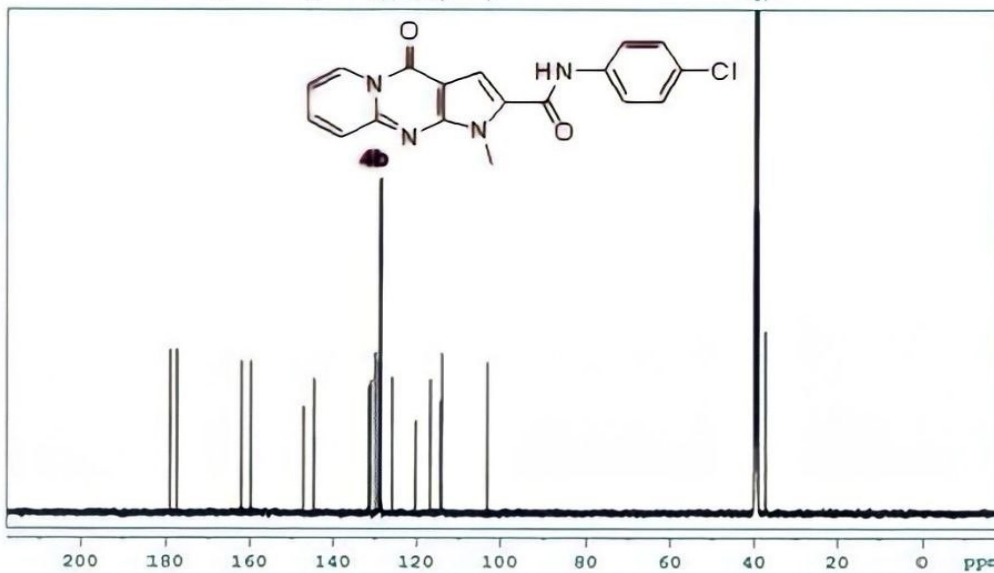

```

NAME 2-((1,2,4,5-tetrahydro-1H-benzopyrido[4,3-b]pyridin-5(2H)-ylidene)amino)-4-chlorobenzamide
EXPNO 13c
PROCNO 1
Date_ 20111111
Time 8:29
INSTRUM spect
PROBHD 5 mm KRMAG 1H-
PULPROG zgpg30
TD 65536
SOLVENT CDCl3
AQ 4.314
RG 1024
DELTA 133
NUC1 13C
NUC2 1H
F1 125.131634 Hz
F2 50.618150 Hz
AQ 4.15
RG 1024
DELTA 133
SOLVENT CDCl3
NS 1
DS 1
SI 1

```

```

===== CHANNEL f1 =====
NOC1 13C
P1 8.02 useat
PL1 2.00 dB
PL12 12.00 useat
PT1 13.00 useat

```

```

===== CHANNEL f2 =====
CPDPRG1 waltz16
MAG 10
P1P2 07.00 useat
PL1 1.00 dB
PL12 19.50 dB
PL13 19.44 dB
PL14 19.44 dB
PL15 19.44 dB useat
PL16 19.44 dB useat
PL17 19.44 dB useat
PL18 19.44 dB useat
PL19 19.44 dB useat
PL20 19.44 dB useat
PT2 13.00 useat
SI 1
SF 125.131634 MHz
SF 50.618150 MHz
WDW EM
GB 0
LA 1.00 Hz
GB 4
SI 1.00
```

### 1.3 Spectral data of 23

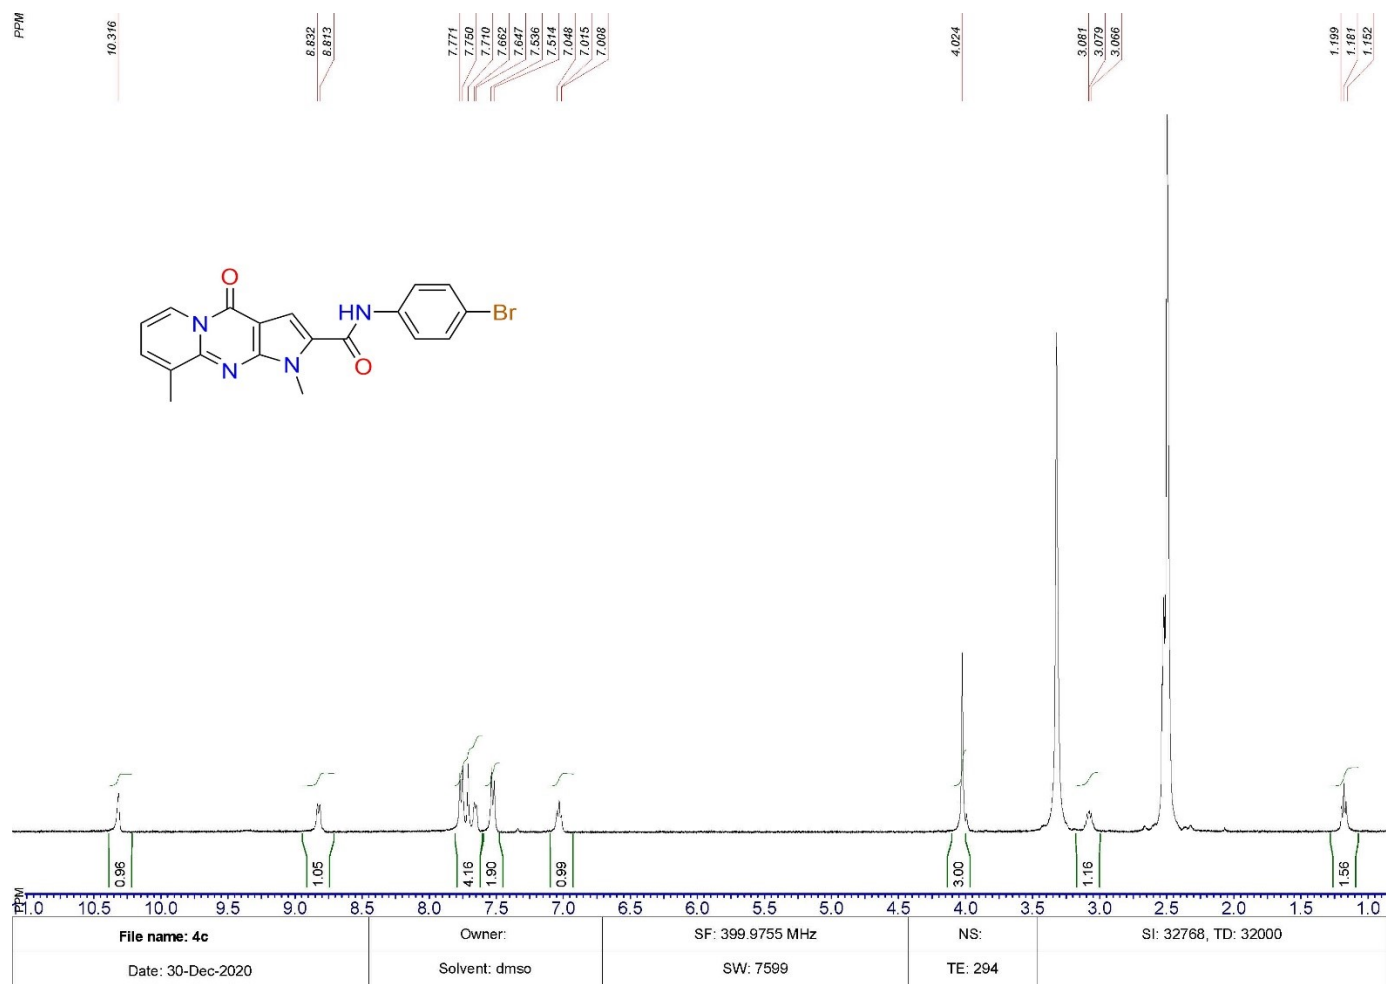



## 1.4 Spectral data of 24

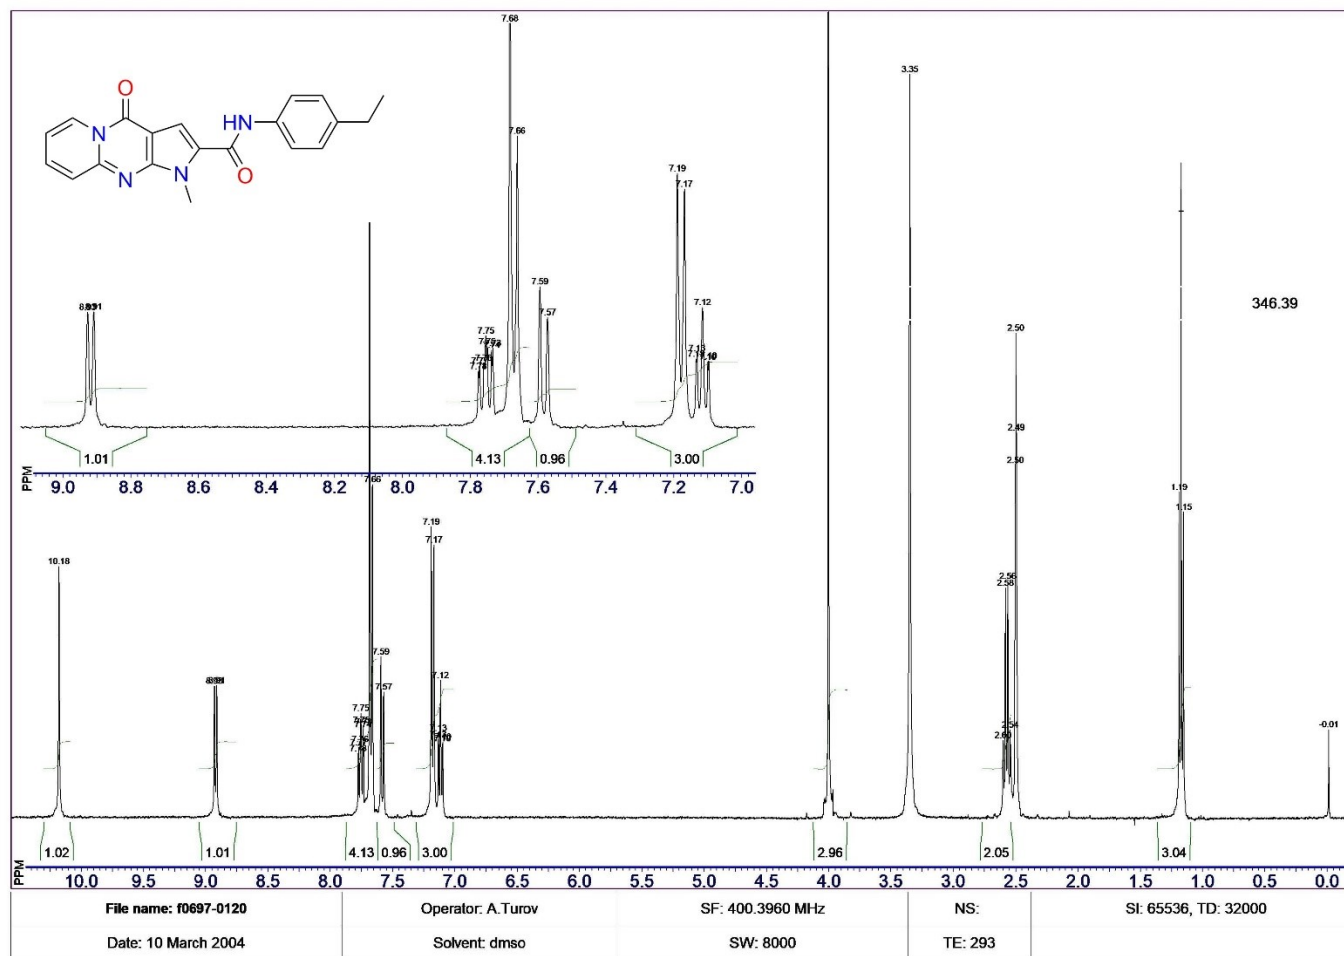



## 1.5 Spectral data of 25

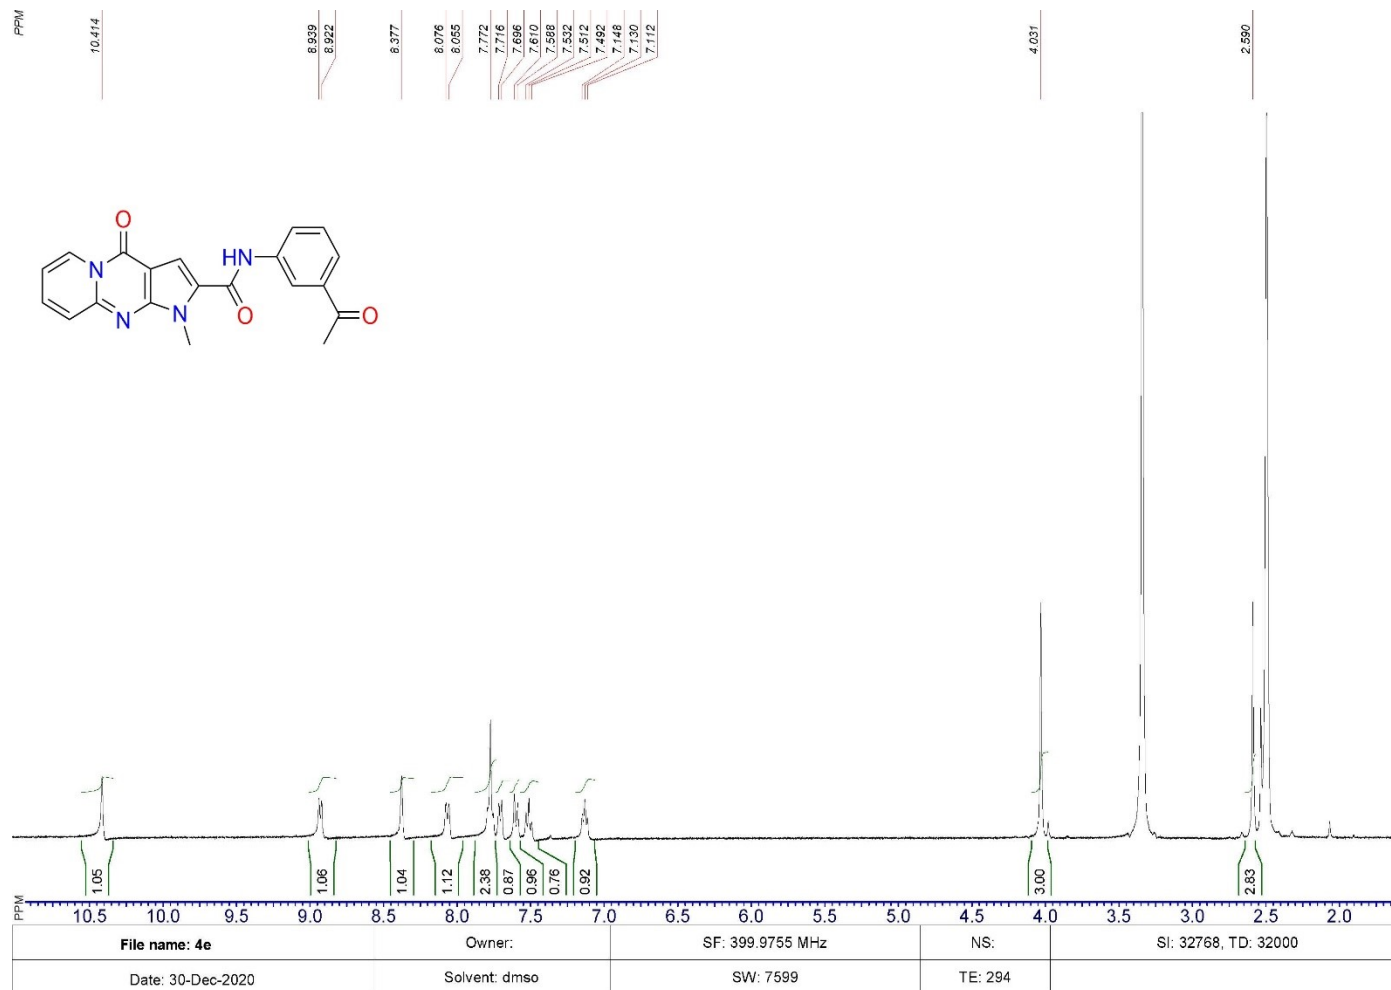

## 1.6 Spectral data of 26

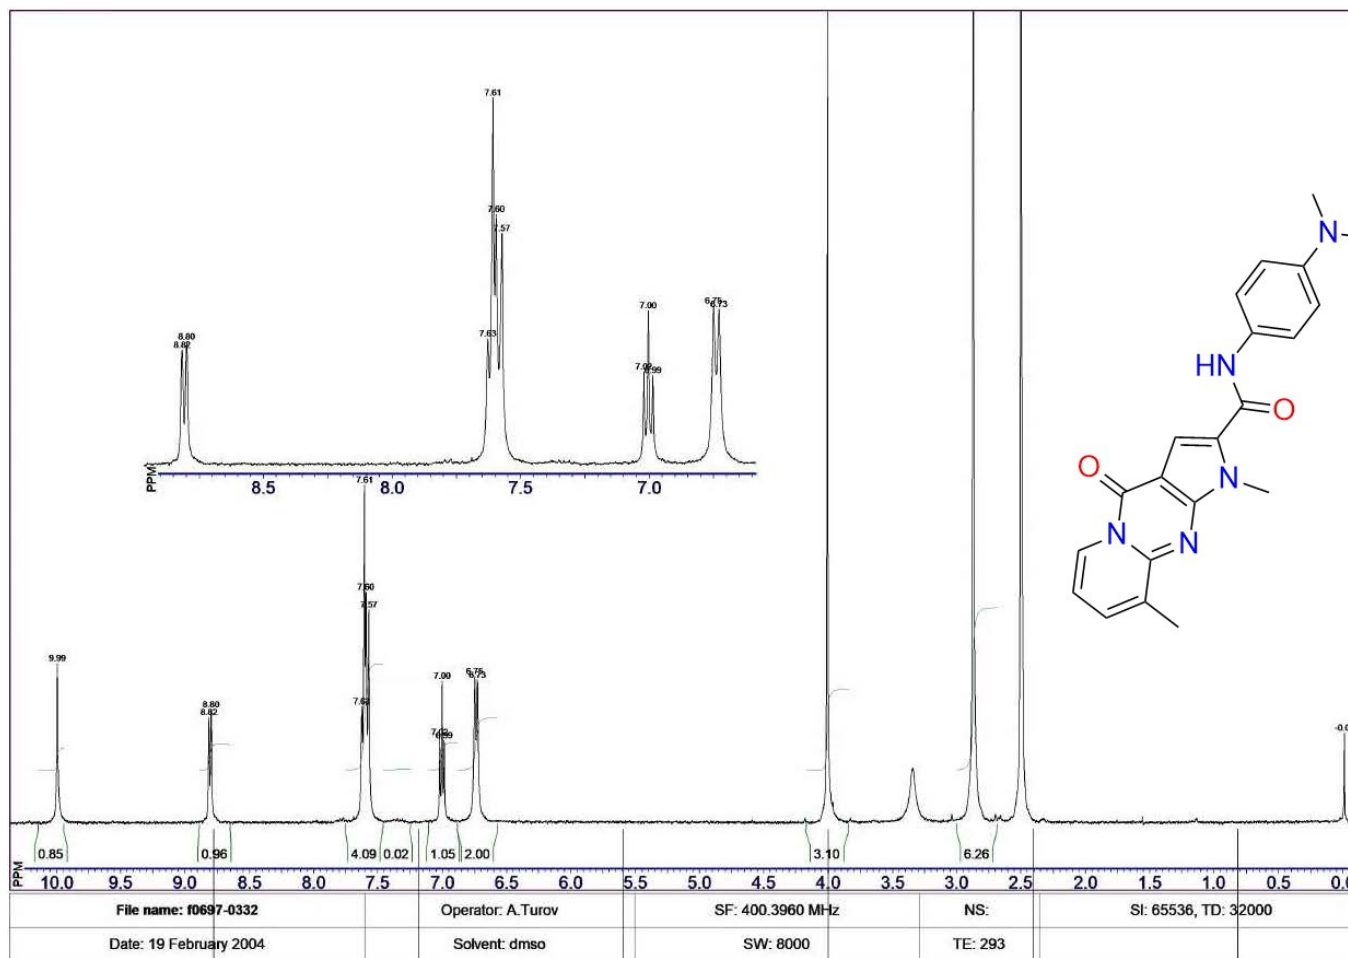

500 MHz Ultra Shield™

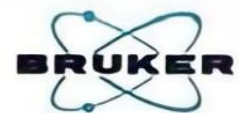

13C (47)

168.74  
167.24  
162.67  
160.60  
147.24  
146.70  
131.56  
131.11  
130.03  
129.23  
128.60  
128.29  
120.37  
116.86  
112.60  
114.03  
103.11  
45.12  
40.10  
40.01  
39.93  
39.84  
39.76  
39.67  
39.60  
39.51  
39.34  
39.37  
39.01  
36.32  
21.37

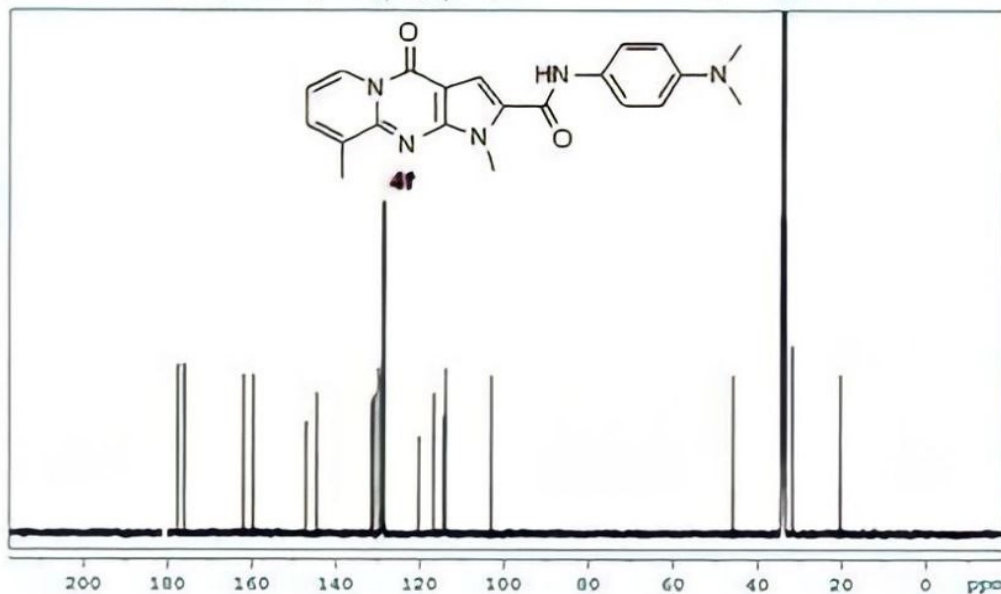

| NAME      | 20110111       | 400 |
|-----------|----------------|-----|
| EXPNO     | 1              |     |
| F2 - PROC | 1              |     |
| Date_     | 011012         |     |
| Time      | 4.39           |     |
| INSTRUM   | cpdpr1         |     |
| PROBHD    | 1 mm PABBO 501 |     |
| PULPROG   | zgpg30         |     |
| TD        | 65536          |     |
| DELTA     | 0.0000         |     |
| DE        | 110            |     |
| TE        | 300            |     |
| NUC1      | 13C            |     |
| NUC2      | 13C            |     |
| NUC3      | 13C            |     |
| NUC4      | 13C            |     |
| NUC5      | 13C            |     |
| NUC6      | 13C            |     |
| NUC7      | 13C            |     |
| NUC8      | 13C            |     |
| NUC9      | 13C            |     |
| NUC10     | 13C            |     |
| NUC11     | 13C            |     |
| NUC12     | 13C            |     |
| NUC13     | 13C            |     |
| NUC14     | 13C            |     |
| NUC15     | 13C            |     |
| NUC16     | 13C            |     |
| NUC17     | 13C            |     |
| NUC18     | 13C            |     |
| NUC19     | 13C            |     |
| NUC20     | 13C            |     |
| NUC21     | 13C            |     |
| NUC22     | 13C            |     |
| NUC23     | 13C            |     |
| NUC24     | 13C            |     |
| NUC25     | 13C            |     |
| NUC26     | 13C            |     |
| NUC27     | 13C            |     |
| NUC28     | 13C            |     |
| NUC29     | 13C            |     |
| NUC30     | 13C            |     |
| NUC31     | 13C            |     |
| NUC32     | 13C            |     |
| NUC33     | 13C            |     |
| NUC34     | 13C            |     |
| NUC35     | 13C            |     |
| NUC36     | 13C            |     |
| NUC37     | 13C            |     |
| NUC38     | 13C            |     |
| NUC39     | 13C            |     |
| NUC40     | 13C            |     |
| NUC41     | 13C            |     |
| NUC42     | 13C            |     |
| NUC43     | 13C            |     |
| NUC44     | 13C            |     |
| NUC45     | 13C            |     |
| NUC46     | 13C            |     |
| NUC47     | 13C            |     |
| NUC48     | 13C            |     |
| NUC49     | 13C            |     |
| NUC50     | 13C            |     |
| NUC51     | 13C            |     |
| NUC52     | 13C            |     |
| NUC53     | 13C            |     |
| NUC54     | 13C            |     |
| NUC55     | 13C            |     |
| NUC56     | 13C            |     |
| NUC57     | 13C            |     |
| NUC58     | 13C            |     |
| NUC59     | 13C            |     |
| NUC60     | 13C            |     |
| NUC61     | 13C            |     |
| NUC62     | 13C            |     |
| NUC63     | 13C            |     |
| NUC64     | 13C            |     |
| NUC65     | 13C            |     |
| NUC66     | 13C            |     |
| NUC67     | 13C            |     |
| NUC68     | 13C            |     |
| NUC69     | 13C            |     |
| NUC70     | 13C            |     |
| NUC71     | 13C            |     |
| NUC72     | 13C            |     |
| NUC73     | 13C            |     |
| NUC74     | 13C            |     |
| NUC75     | 13C            |     |
| NUC76     | 13C            |     |
| NUC77     | 13C            |     |
| NUC78     | 13C            |     |
| NUC79     | 13C            |     |
| NUC80     | 13C            |     |
| NUC81     | 13C            |     |
| NUC82     | 13C            |     |
| NUC83     | 13C            |     |
| NUC84     | 13C            |     |
| NUC85     | 13C            |     |
| NUC86     | 13C            |     |
| NUC87     | 13C            |     |
| NUC88     | 13C            |     |
| NUC89     | 13C            |     |
| NUC90     | 13C            |     |
| NUC91     | 13C            |     |
| NUC92     | 13C            |     |
| NUC93     | 13C            |     |
| NUC94     | 13C            |     |
| NUC95     | 13C            |     |
| NUC96     | 13C            |     |
| NUC97     | 13C            |     |
| NUC98     | 13C            |     |
| NUC99     | 13C            |     |
| NUC100    | 13C            |     |

## 1.7 Spectral data of 27

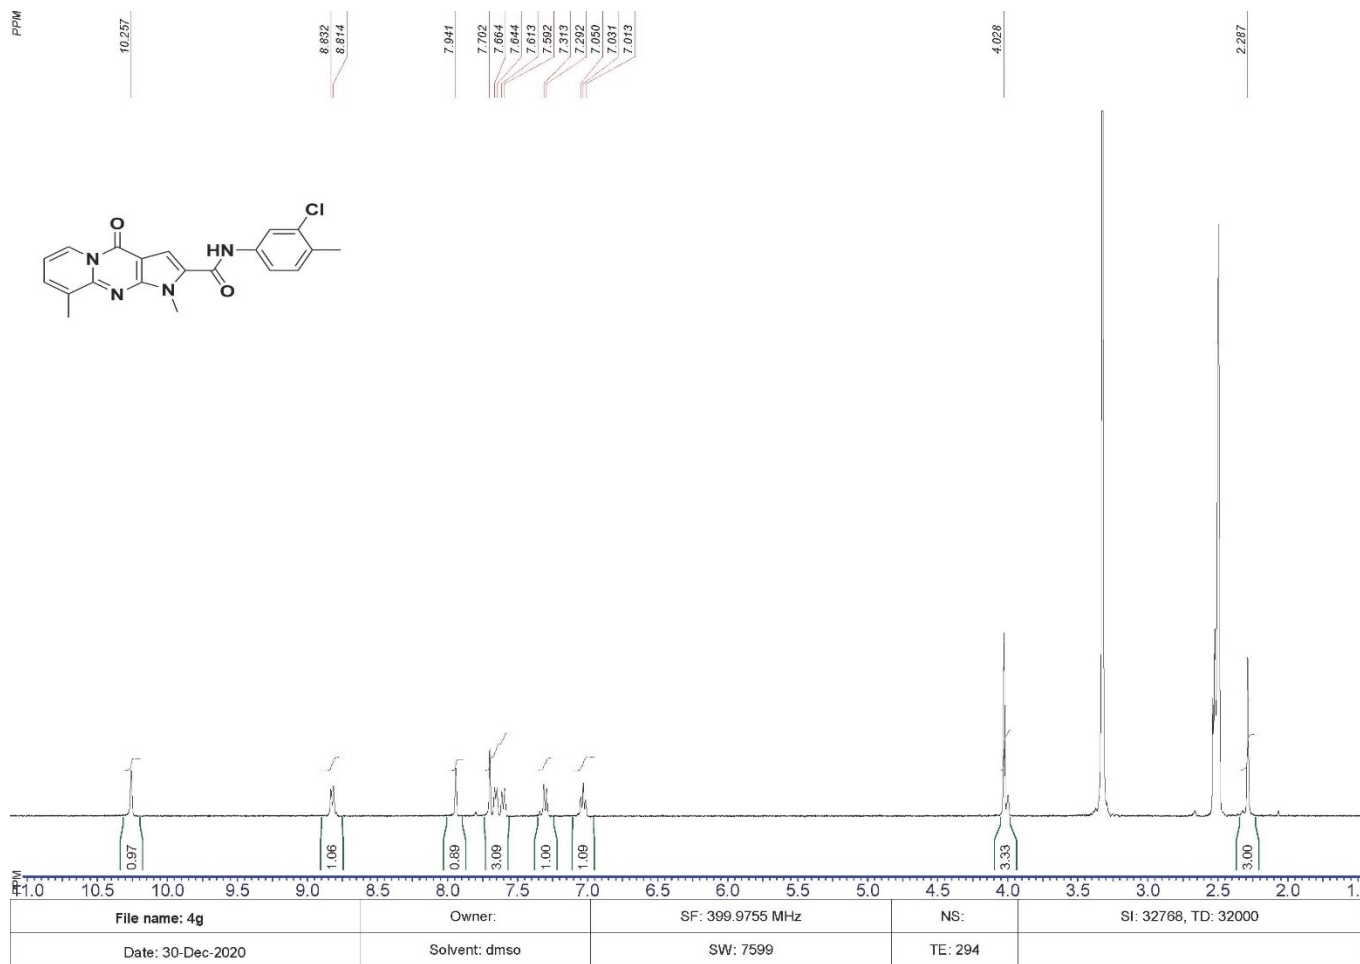

## 1.8 Spectral data of 28

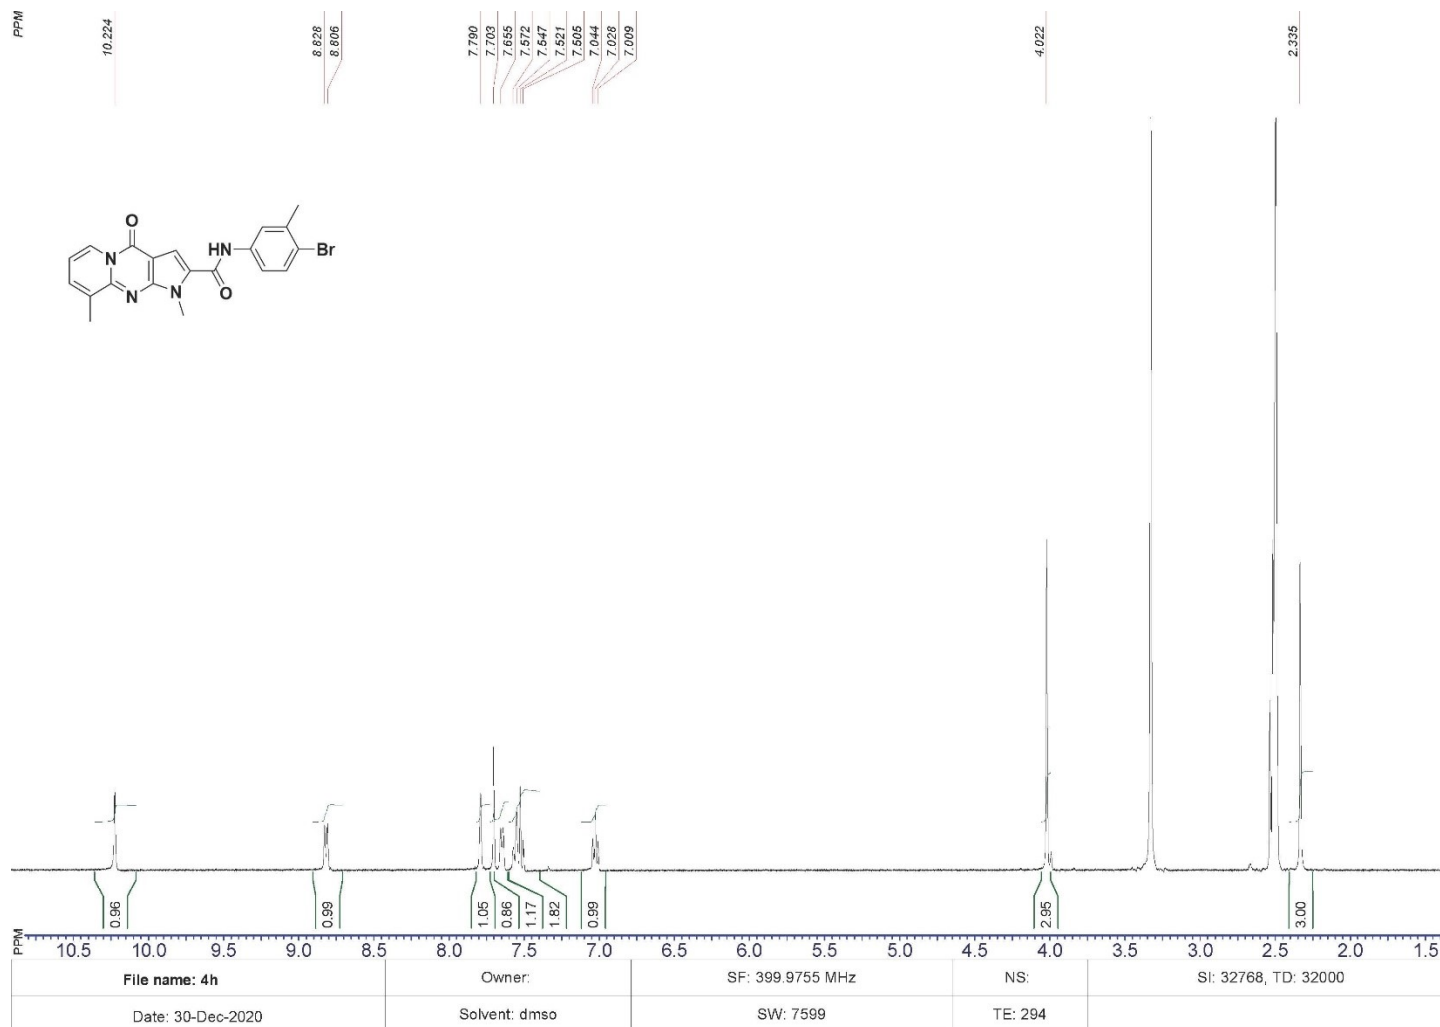

## 1.9 Spectral data of 29

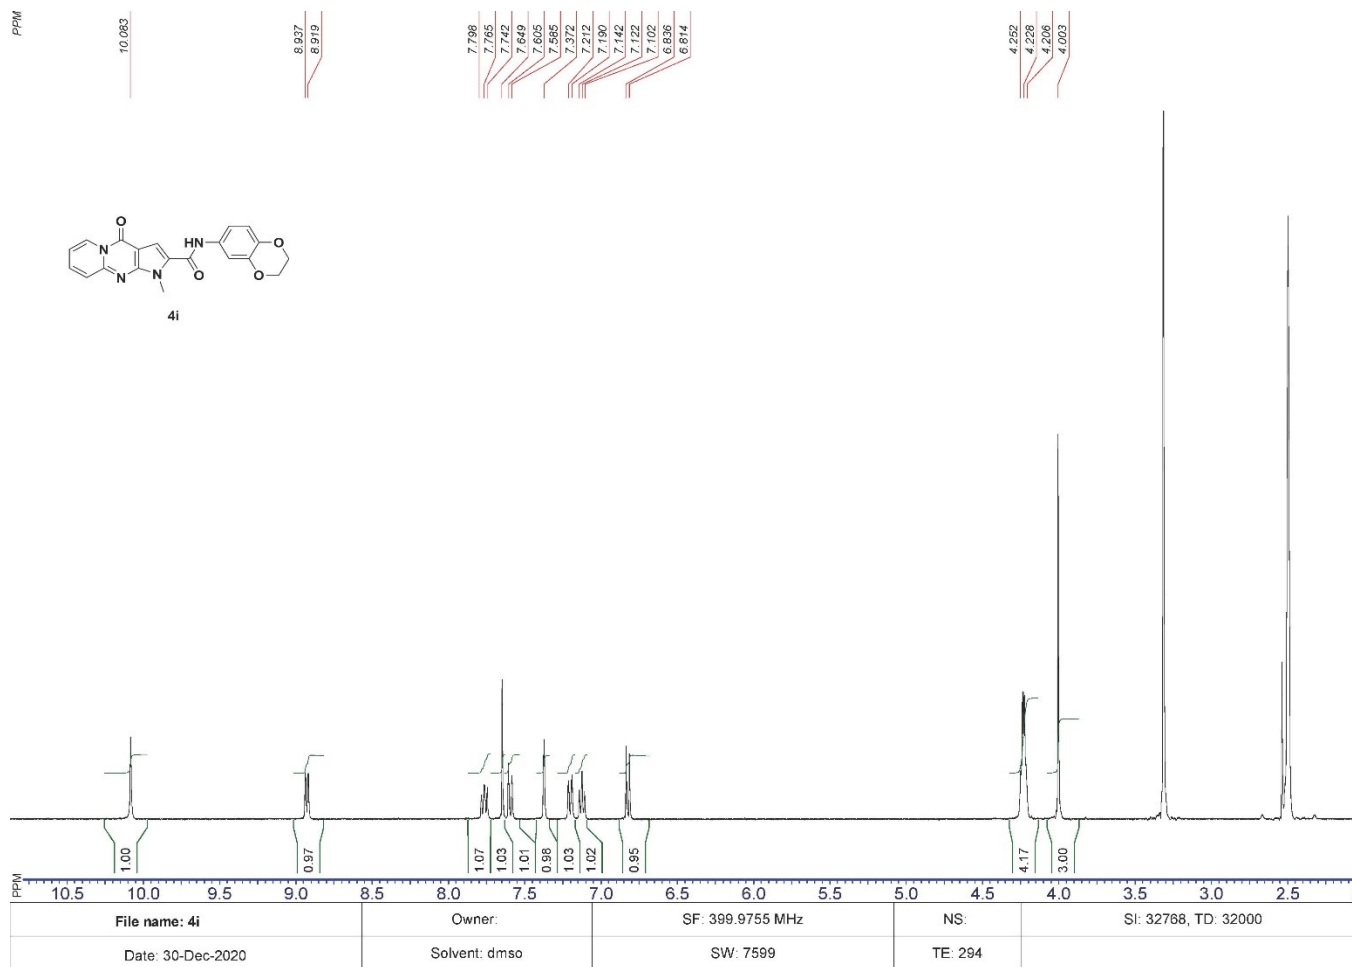

## 2 Raw Data of Results of Biological Evaluation Studies

### 2.1 COV19 Antiviral report (EC<sub>50</sub>)

|                   |                                              |                                                                         |                            |
|-------------------|----------------------------------------------|-------------------------------------------------------------------------|----------------------------|
| <b>Researcher</b> | : Dr.Hany Emary                              | email: <a href="mailto:jan_25_misr@yahoo.com">jan_25_misr@yahoo.com</a> | <b>mob.</b> 00966534391522 |
| <b>Assay</b>      | : Human coronavirus (COV 19) Antiviral assay |                                                                         |                            |
| <b>Samples</b>    | : 10 sample.                                 |                                                                         |                            |
| <b>Cell lines</b> | : Vero                                       |                                                                         |                            |

### Antiviral report EC50

| s  | Human COVID-19     |     |        |            | SE      |
|----|--------------------|-----|--------|------------|---------|
|    | Antiviral activity |     |        |            |         |
|    | code               | ID  | MW     | EC50<br>uM |         |
| 1  | A1                 | 17  | 333.35 | 22.1       | 1.012   |
| 2  | A2                 | 21  | 412.42 | 0.0138     | 0.00198 |
| 3  | A3                 | 22  | 352.77 | 0.1093     | 0.01105 |
| 4  | A4                 | 23  | 411.25 | 0.0216     | 0.00656 |
| 5  | A5                 | 24  | 346.36 | 0.0762     | 0.00973 |
| 6  | A6                 | 25  | 360.37 | 0.1066     | 0.00115 |
| 7  | A7                 | 26  | 375.42 | 0.0376     | 0.00423 |
| 8  | A8                 | 27  | 380.83 | 0.1035     | 0.00344 |
| 9  | A9                 | 28  | 425.28 | 0.108      | 0.00304 |
| 10 | A10                | 29  | 376.37 | 0.0519     | 0.00512 |
| 11 | Remdesivir         | Rem | 602.6  | 0.0099     | 0.00175 |

| Human COVID-19 |        |            |             |                    |             |             |                    |                     |
|----------------|--------|------------|-------------|--------------------|-------------|-------------|--------------------|---------------------|
| s              | sample |            | viral Titer |                    |             | Average inh | reduction          | log diff            |
|                | code   | conc<br>uM | CT          | IU/ml              | Log         | %           | %                  |                     |
| A1             | 17     | 10         | 27.68       | <b>40837.44764</b> | 4.611058591 | 65.84874    | <b>24.47277063</b> | <b>-1.494101931</b> |
|                |        | 1          | 26.41       | <b>98717.42845</b> | 4.994393834 | 62.33552    | <b>18.19389816</b> | <b>-1.110766688</b> |
|                |        | 0.1        | 25.69       | <b>162823.7493</b> | 5.211717751 | 57.26799    | <b>14.63422244</b> | <b>-0.893442771</b> |
|                |        | 0.01       | 23.75       | <b>627025.1669</b> | 5.797284972 | 51.88122    | <b>5.042873957</b> | <b>-0.30787555</b>  |
|                |        | 0.001      | 22.93       | <b>1108645.675</b> | 6.044792767 | 11.81672    | <b>0.988798817</b> | <b>-0.060367755</b> |

|    |    |       |       |                    |             |          |                    |                     |
|----|----|-------|-------|--------------------|-------------|----------|--------------------|---------------------|
| A2 | 21 | 10    | 26.76 | <b>77401.65783</b> | 4.888750263 | 96.56116 | <b>19.92429609</b> | <b>-1.216410259</b> |
|    |    | 1     | 25.61 | <b>172133.2834</b> | 5.235864853 | 92.29183 | <b>14.23870291</b> | <b>-0.869295669</b> |
|    |    | 0.1   | 23.95 | <b>545653.8422</b> | 5.736917218 | 87.20714 | <b>6.031672757</b> | <b>-0.368243304</b> |
|    |    | 0.01  | 22.81 | <b>1205073.177</b> | 6.08101342  | 50.76645 | <b>0.395519527</b> | <b>-0.024147102</b> |
|    |    | 0.001 | 22.79 | <b>1221940.883</b> | 6.087050195 | 12.32199 | <b>0.296639653</b> | <b>-0.018110327</b> |



|    |    |              |       |                    |             |                 |                    |                     |
|----|----|--------------|-------|--------------------|-------------|-----------------|--------------------|---------------------|
| A3 | 25 | <b>10</b>    | 27.55 | <b>44698.98189</b> | 4.650297631 | <b>96.35706</b> | <b>23.83005141</b> | <b>-1.454862891</b> |
|    |    | <b>1</b>     | 26.73 | <b>79032.44649</b> | 4.897805426 | <b>93.65733</b> | <b>19.77597627</b> | <b>-1.207355096</b> |
|    |    | <b>0.1</b>   | 24.85 | <b>291918.9721</b> | 5.465262321 | <b>77.04097</b> | <b>10.48126742</b> | <b>-0.639898201</b> |
|    |    | <b>0.01</b>  | 23.56 | <b>715540.6967</b> | 5.85463434  | <b>43.80263</b> | <b>4.103515069</b> | <b>-0.250526182</b> |
|    |    | <b>0.001</b> | 22.91 | <b>1124163.661</b> | 6.050829543 | <b>11.6221</b>  | <b>0.889918927</b> | <b>-0.054330979</b> |
| A4 | 23 | <b>10</b>    | 26.94 | <b>68299.77664</b> | 4.834419283 | <b>94.40136</b> | <b>20.81421503</b> | <b>-1.270741239</b> |
|    |    | <b>1</b>     | 25.38 | <b>201970.421</b>  | 5.305287771 | <b>84.24793</b> | <b>13.10158428</b> | <b>-0.799872751</b> |
|    |    | <b>0.1</b>   | 24.15 | <b>474842.3688</b> | 5.676549463 | <b>62.60013</b> | <b>7.020471574</b> | <b>-0.428611059</b> |
|    |    | <b>0.01</b>  | 23.07 | <b>1005854.907</b> | 6.002535339 | <b>21.05225</b> | <b>1.68095798</b>  | <b>-0.102625183</b> |
|    |    | <b>0.001</b> | 22.76 | <b>1247686.163</b> | 6.096105359 | <b>2.147868</b> | <b>0.148319818</b> | <b>-0.009055163</b> |

|    |    |             |       |                    |             |                 |                    |                     |
|----|----|-------------|-------|--------------------|-------------|-----------------|--------------------|---------------------|
| A5 | 24 | <b>10</b>   | 27.05 | <b>63272.79485</b> | 4.801217018 | <b>95.02447</b> | <b>21.35805438</b> | <b>-1.303943504</b> |
|    |    | <b>1</b>    | 25.95 | <b>135906.3252</b> | 5.13323967  | <b>89.31063</b> | <b>15.91966089</b> | <b>-0.971920852</b> |
|    |    | <b>0.1</b>  | 23.78 | <b>614086.8665</b> | 5.788229809 | <b>51.52506</b> | <b>5.191193775</b> | <b>-0.316930713</b> |
|    |    | <b>0.01</b> | 22.82 | <b>1196726.842</b> | 6.077995032 | <b>6.100991</b> | <b>0.444959472</b> | <b>-0.02716549</b>  |

|  |  |              |       |                    |             |                 |                    |                     |
|--|--|--------------|-------|--------------------|-------------|-----------------|--------------------|---------------------|
|  |  | <b>0.001</b> | 22.79 | <b>1221940.883</b> | 6.087050195 | <b>4.084029</b> | <b>0.296639653</b> | <b>-0.018110327</b> |
|--|--|--------------|-------|--------------------|-------------|-----------------|--------------------|---------------------|

|    |    |              |       |                    |             |                 |                    |                     |
|----|----|--------------|-------|--------------------|-------------|-----------------|--------------------|---------------------|
| A6 | 22 | <b>10</b>    | 26.64 | <b>84133.87959</b> | 4.924970916 | <b>91.75463</b> | <b>19.3310168</b>  | <b>-1.180189606</b> |
|    |    | <b>1</b>     | 25.85 | <b>145687.9214</b> | 5.163423547 | <b>74.74431</b> | <b>15.42526149</b> | <b>-0.941736975</b> |
|    |    | <b>0.1</b>   | 24.51 | <b>369732.3952</b> | 5.567887504 | <b>37.66246</b> | <b>8.800309444</b> | <b>-0.537273018</b> |
|    |    | <b>0.01</b>  | 23.27 | <b>875321.4759</b> | 5.942167584 | <b>8.001796</b> | <b>2.669756797</b> | <b>-0.162992938</b> |
|    |    | <b>0.001</b> | 22.92 | <b>1116377.705</b> | 6.047811155 | <b>5.408329</b> | <b>0.939358872</b> | <b>-0.057349367</b> |

|    |    |              |       |                    |             |                 |                    |                     |
|----|----|--------------|-------|--------------------|-------------|-----------------|--------------------|---------------------|
| A7 | 26 | <b>10</b>    | 26.82 | <b>74240.33729</b> | 4.870639936 | <b>94.15448</b> | <b>20.22093574</b> | <b>-1.234520586</b> |
|    |    | <b>1</b>     | 25.05 | <b>254035.5908</b> | 5.404894566 | <b>80.03899</b> | <b>11.47006624</b> | <b>-0.700265956</b> |
|    |    | <b>0.1</b>   | 24.19 | <b>461823.3762</b> | 5.664475912 | <b>63.59745</b> | <b>7.218231337</b> | <b>-0.44068461</b>  |
|    |    | <b>0.01</b>  | 22.84 | <b>1180207.192</b> | 6.071958257 | <b>7.298603</b> | <b>0.543839345</b> | <b>-0.033202265</b> |
|    |    | <b>0.001</b> | 22.77 | <b>1239044.69</b>  | 6.093086971 | <b>2.505814</b> | <b>0.197759763</b> | <b>-0.012073551</b> |

|    |    |           |       |                    |             |                 |                    |                     |
|----|----|-----------|-------|--------------------|-------------|-----------------|--------------------|---------------------|
| A8 | 27 | <b>10</b> | 27.01 | <b>65056.48119</b> | 4.813290569 | <b>94.75049</b> | <b>21.16029461</b> | <b>-1.291869953</b> |
|    |    | <b>1</b>  | 25.71 | <b>160576.1258</b> | 5.205680975 | <b>87.26222</b> | <b>14.73310233</b> | <b>-0.899479547</b> |

|  |  |              |       |                    |             |                 |                    |                     |
|--|--|--------------|-------|--------------------|-------------|-----------------|--------------------|---------------------|
|  |  | <b>0.1</b>   | 24.34 | <b>416102.2803</b> | 5.619200096 | <b>67.35924</b> | <b>7.959830446</b> | <b>-0.485960426</b> |
|  |  | <b>0.01</b>  | 23.16 | <b>944865.1895</b> | 5.975369849 | <b>25.78157</b> | <b>2.125917452</b> | <b>-0.129790673</b> |
|  |  | <b>0.001</b> | 22.85 | <b>1172033.079</b> | 6.068939869 | <b>8.114086</b> | <b>0.59327929</b>  | <b>-0.036220653</b> |

|    |    |              |       |                    |                    |                 |                    |                     |
|----|----|--------------|-------|--------------------|--------------------|-----------------|--------------------|---------------------|
| A9 | 29 | <b>10</b>    | 26.38 | <b>100797.3227</b> | <b>5.003448997</b> | <b>91.75463</b> | <b>18.04557834</b> | <b>-1.101711525</b> |
|    |    | <b>1</b>     | 24.71 | <b>321750.8845</b> | <b>5.507519749</b> | <b>74.74431</b> | <b>9.789108261</b> | <b>-0.597640773</b> |
|    |    | <b>0.1</b>   | 23.41 | <b>794163.9256</b> | <b>5.899910156</b> | <b>37.66246</b> | <b>3.36191596</b>  | <b>-0.205250366</b> |
|    |    | <b>0.01</b>  | 22.85 | <b>1172033.079</b> | <b>6.068939869</b> | <b>8.001796</b> | <b>0.59327929</b>  | <b>-0.036220653</b> |
|    |    | <b>0.001</b> | 22.81 | <b>1205073.177</b> | <b>6.08101342</b>  | <b>5.408329</b> | <b>0.395519527</b> | <b>-0.024147102</b> |

|     |    |              |       |                    |                    |                 |                    |                     |
|-----|----|--------------|-------|--------------------|--------------------|-----------------|--------------------|---------------------|
| A10 | 28 | <b>10</b>    | 26.38 | <b>100797.3227</b> | <b>5.003448997</b> | <b>91.87169</b> | <b>18.04557834</b> | <b>-1.101711525</b> |
|     |    | <b>1</b>     | 24.71 | <b>321750.8845</b> | <b>5.507519749</b> | <b>74.72702</b> | <b>9.789108261</b> | <b>-0.597640773</b> |
|     |    | <b>0.1</b>   | 23.41 | <b>794163.9256</b> | <b>5.899910156</b> | <b>37.80133</b> | <b>3.36191596</b>  | <b>-0.205250366</b> |
|     |    | <b>0.01</b>  | 22.85 | <b>1172033.079</b> | <b>6.068939869</b> | <b>8.19156</b>  | <b>0.59327929</b>  | <b>-0.036220653</b> |
|     |    | <b>0.001</b> | 22.81 | <b>1205073.177</b> | <b>6.08101342</b>  | <b>5.506479</b> | <b>0.395519527</b> | <b>-0.024147102</b> |

|     |            |       |       |             |             |          |             |              |
|-----|------------|-------|-------|-------------|-------------|----------|-------------|--------------|
| ref | Remdesivir | 10    | 28.36 | 25457.05872 | 4.405808224 | 97.9982  | 27.8346866  | -1.699352298 |
|     |            | 1     | 27.11 | 60688.5403  | 4.783106692 | 95.20432 | 21.65469401 | -1.32205383  |
|     |            | 0.1   | 26.44 | 96680.45161 | 4.98533867  | 64.68271 | 18.342218   | -1.119821852 |
|     |            | 0.01  | 23.84 | 589005.6799 | 5.770119483 | 53.7732  | 5.487833412 | -0.335041039 |
|     |            | 0.001 | 22.96 | 1085769.415 | 6.035737604 | 14.79105 | 1.137118635 | -0.069422918 |

|     |          |     |       |             |             |   |   |   |
|-----|----------|-----|-------|-------------|-------------|---|---|---|
| *** | pos.cont | --- | 22.81 | 1273973.874 | 6.105160522 | 0 | 0 | 0 |
|     |          |     |       |             |             |   |   |   |

Crude data of biology (readout of triplicate assay)

| ID |       | Reading1 | reading2 | reading3 | Average %inh | EC50 |
|----|-------|----------|----------|----------|--------------|------|
| 21 | 10    | 96.79448 | 96.11    | 96.779   | 96.56116     |      |
|    | 1     | 92.2115  | 92.553   | 92.111   | 92.29183     |      |
|    | 0.1   | 87.21922 | 87.20333 | 87.19887 | 87.20714     |      |
|    | 0.01  | 50.78195 | 50.59887 | 50.91854 | 50.76645     |      |
|    | 0.001 | 12.97736 | 11.9899  | 11.9987  | 12.32199     |      |

| ID |       | Reading1  | reading2  | reading3  | Average %inh | EC50 |
|----|-------|-----------|-----------|-----------|--------------|------|
| 25 | 10    | 96.491374 | 96.365214 | 96.214587 | 96.35706     |      |
|    | 1     | 93.796384 | 93.521478 | 93.654128 | 93.65733     |      |
|    | 0.1   | 77.085953 | 77.021458 | 77.015487 | 77.04097     |      |
|    | 0.01  | 43.833958 | 43.852452 | 43.721485 | 43.80263     |      |
|    | 0.001 | 11.759285 | 11.654125 | 11.452879 | 11.6221      |      |

| ID |    | Reading1  | reading2   | reading3   | Average %inh | EC50 |
|----|----|-----------|------------|------------|--------------|------|
| 23 | 10 | 94.63884  | 94.2111154 | 94.3541267 | 94.40136     |      |
|    | 1  | 84.146424 | 83.9452154 | 84.652143  | 84.24793     |      |

|  |              |           |            |            |          |  |
|--|--------------|-----------|------------|------------|----------|--|
|  | <b>0.1</b>   | 62.727464 | 62.251463  | 62.8214561 | 62.60013 |  |
|  | <b>0.01</b>  | 21.045876 | 21.1254621 | 20.9854123 | 21.05225 |  |
|  | <b>0.001</b> | 2.0634419 | 2.2546981  | 2.1254651  | 2.147868 |  |

| ID |              | Reading1  | reading2   | reading3   | Average %inh | EC50 |
|----|--------------|-----------|------------|------------|--------------|------|
| 24 | <b>10</b>    | 95.033431 | 94.9857621 | 95.0542181 | 95.02447     |      |
|    | <b>1</b>     | 89.332095 | 89.2852164 | 89.3145824 | 89.31063     |      |
|    | <b>0.1</b>   | 51.797531 | 51.5621482 | 51.2154897 | 51.52506     |      |
|    | <b>0.01</b>  | 6.0634706 | 6.0852136  | 6.1542895  | 6.100991     |      |
|    | <b>0.001</b> | 4.084306  | 4.0952148  | 4.0725648  | 4.084029     |      |

| ID |              | Reading1  | reading2  | reading3  | Average %inh | EC50 |
|----|--------------|-----------|-----------|-----------|--------------|------|
| 26 | <b>10</b>    | 94.172538 | 94.185422 | 94.105487 | 94.15448     |      |
|    | <b>1</b>     | 80.059592 | 80.035217 | 80.022148 | 80.03899     |      |
|    | <b>0.1</b>   | 63.749384 | 63.521481 | 63.521485 | 63.59745     |      |
|    | <b>0.01</b>  | 7.3601731 | 7.2154801 | 7.3201548 | 7.298603     |      |
|    | <b>0.001</b> | 2.7417504 | 2.521584  | 2.2541065 | 2.505814     |      |

| ID |              | Reading1  | reading2   | reading3   | Average %inh | EC50 |
|----|--------------|-----------|------------|------------|--------------|------|
| 27 | <b>10</b>    | 94.893421 | 94.8452121 | 94.5128413 | 94.75049     |      |
|    | <b>1</b>     | 87.39565  | 87.3951248 | 86.9958789 | 87.26222     |      |
|    | <b>0.1</b>   | 67.338241 | 67.214598  | 67.5248796 | 67.35924     |      |
|    | <b>0.01</b>  | 25.833237 | 25.652148  | 25.859314  | 25.78157     |      |
|    | <b>0.001</b> | 8.0017964 | 8.2150601  | 8.1254004  | 8.114086     |      |

| ID |              | Reading1  | reading2   | reading3  | Average %inh | EC50 |
|----|--------------|-----------|------------|-----------|--------------|------|
| 28 | <b>10</b>    | 92.08796  | 91.98583   | 91.541281 | 91.87169     |      |
|    | <b>1</b>     | 74.744311 | 74.541287  | 74.895476 | 74.72702     |      |
|    | <b>0.1</b>   | 37.662464 | 37.7541203 | 37.987412 | 37.80133     |      |
|    | <b>0.01</b>  | 8.0017964 | 8.0250187  | 8.547866  | 8.19156      |      |
|    | <b>0.001</b> | 5.4083289 | 5.236587   | 5.874521  | 5.506479     |      |

| ID |            | Reading1  | reading2  | reading3  | Average %inh | EC50 |
|----|------------|-----------|-----------|-----------|--------------|------|
| 29 | <b>10</b>  | 91.08796  | 92.08796  | 92.08796  | 91.75463     |      |
|    | <b>1</b>   | 74.744311 | 74.744311 | 74.744311 | 74.74431     |      |
|    | <b>0.1</b> | 37.662464 | 37.662464 | 37.662464 | 37.66246     |      |

|  |              |           |           |           |          |  |
|--|--------------|-----------|-----------|-----------|----------|--|
|  | <b>0.01</b>  | 8.0017964 | 8.0017964 | 8.0017964 | 8.001796 |  |
|  | <b>0.001</b> | 5.4083289 | 5.4083289 | 5.4083289 | 5.408329 |  |

| ID |              | Reading1  | reading2  | reading3  | Average %inh | EC50 |
|----|--------------|-----------|-----------|-----------|--------------|------|
| 22 | <b>10</b>    | 91.08796  | 92.08796  | 92.08796  | 91.75463     |      |
|    | <b>1</b>     | 74.744311 | 74.744311 | 74.744311 | 74.74431     |      |
|    | <b>0.1</b>   | 37.662464 | 37.662464 | 37.662464 | 37.66246     |      |
|    | <b>0.01</b>  | 8.0017964 | 8.0017964 | 8.0017964 | 8.001796     |      |
|    | <b>0.001</b> | 5.4083289 | 5.4083289 | 5.4083289 | 5.408329     |      |

| ID |            | Reading1 | reading2 | reading3  | Average %inh | EC50 |
|----|------------|----------|----------|-----------|--------------|------|
| 17 | <b>10</b>  | 65.89448 | 65.66448 | 65.987254 | 65.84874     |      |
|    | <b>1</b>   | 62.25122 | 62.50122 | 62.254126 | 62.33552     |      |
|    | <b>0.1</b> | 57.21922 | 57.21954 | 57.365214 | 57.26799     |      |



|  |              |          |            |           |          |  |
|--|--------------|----------|------------|-----------|----------|--|
|  | <b>0.01</b>  | 51.78195 | 51.8741501 | 51.987562 | 51.88122 |  |
|  | <b>0.001</b> | 11.97736 | 11.874595  | 11.598214 | 11.81672 |  |

| ID  |              | Reading1 | reading2  | reading3  | Average %inh | EC50 |
|-----|--------------|----------|-----------|-----------|--------------|------|
| REM | <b>10</b>    | 97.9982  | 98.00176  | 98.005413 | 97.987421    |      |
|     | <b>1</b>     | 95.20432 | 95.236281 | 95.138281 | 95.238412    |      |
|     | <b>0.1</b>   | 64.68271 | 92.411112 | 92.421548 | 9.2154777    |      |
|     | <b>0.01</b>  | 53.7732  | 53.766267 | 53.768741 | 53.784592    |      |
|     | <b>0.001</b> | 14.79105 | 14.773023 | 14.754129 | 14.845987    |      |

\* This table of data was extracted from triplicate experiments and EC50 values were calculated using the equation

| Sample | Code | Conc | % inh.   | Linear equation             | EC50    |
|--------|------|------|----------|-----------------------------|---------|
| A1     | 17   | 1    | 65.89448 | <b>y = 11.83x + 34.0295</b> | 22.1    |
|        |      | 0    | 62.25122 |                             |         |
|        |      | -1   | 57.21922 |                             |         |
|        |      | -2   | 51.78195 |                             |         |
|        |      | -3   | 11.97736 |                             |         |
| A1     | 21   | 1    | 96.79448 | <b>y = 20.91x + 88.915</b>  | 0.01377 |
|        |      | 0    | 92.25122 |                             |         |
|        |      | -1   | 87.21922 |                             |         |
|        |      | -2   | 50.78195 |                             |         |
|        |      | -3   | 12.97736 |                             |         |
|        |      | 1    | 93.92439 | <b>y = 26.076x + 75.491</b> | 0.10661 |
|        |      | 0    | 86.48848 |                             |         |
|        |      | -1   | 57.16915 |                             |         |
|        |      | -2   | 5.408329 |                             |         |

|  |  |    |          |
|--|--|----|----------|
|  |  | -3 | 4.084306 |
|--|--|----|----------|

|    |    |    |          |
|----|----|----|----------|
| A3 | 23 | 1  | 96.49137 |
|    |    | 0  | 93.79638 |
|    |    | -1 | 77.08595 |
|    |    | -2 | 43.83396 |
|    |    | -3 | 11.75929 |

$$y = 21.943x + 86.536$$

0.021625

|    |    |    |          |
|----|----|----|----------|
| A5 | 24 | 1  | 94.63884 |
|    |    | 0  | 84.14642 |
|    |    | -1 | 62.72746 |
|    |    | -2 | 21.04588 |
|    |    | -3 | 2.063442 |

$$y = 24.825x + 77.75$$

0.076239

|    |    |    |          |
|----|----|----|----------|
| A6 | 22 | 1  | 95.03343 |
|    |    | 0  | 89.3321  |
|    |    | -1 | 51.79753 |
|    |    | -2 | 6.063471 |
|    |    | -3 | 4.084306 |

$$y = 26.517x + 75.77$$

0.109318

|  |  |   |          |
|--|--|---|----------|
|  |  | 1 | 93.39595 |
|--|--|---|----------|

|  |  |    |          |
|--|--|----|----------|
|  |  | 0  | 88.56429 |
|  |  | -1 | 70.97802 |
|  |  | -2 | 31.29204 |
|  |  | -3 | 12.37044 |

$$y = 21.932x + 81.252$$

|    |    |    |          |
|----|----|----|----------|
|    |    | 1  | 94.17254 |
|    |    | 0  | 80.05959 |
|    |    | -1 | 63.74938 |
|    |    | -2 | 7.360173 |
| A8 | 27 | -3 | 2.74175  |

$$y = 25.536x + 75.173$$

0.103511

|    |    |    |          |
|----|----|----|----------|
|    |    | 1  | 94.89342 |
|    |    | 0  | 87.39565 |
|    |    | -1 | 67.33824 |
|    |    | -2 | 25.83324 |
| A9 | 29 | -3 | 8.001796 |

$$y = 23.535x + 80.227$$

0.051959

|  |  |    |          |
|--|--|----|----------|
|  |  | 1  | 92.08796 |
|  |  | 0  | 74.74431 |
|  |  | -1 | 37.66246 |

$$y = 24.01x + 67.591$$

0.1085075

|  |  |    |          |
|--|--|----|----------|
|  |  | -2 | 8.001796 |
|  |  | -3 | 5.408329 |

|     |            |    |          |
|-----|------------|----|----------|
|     |            | 1  | 98.00176 |
|     |            | 0  | 95.23628 |
|     |            | -1 | 92.41111 |
|     |            | -2 | 53.76627 |
| ref | Remdesivir | -3 | 14.77302 |

$Y = 20.78 * X + 86.07$     0.00591

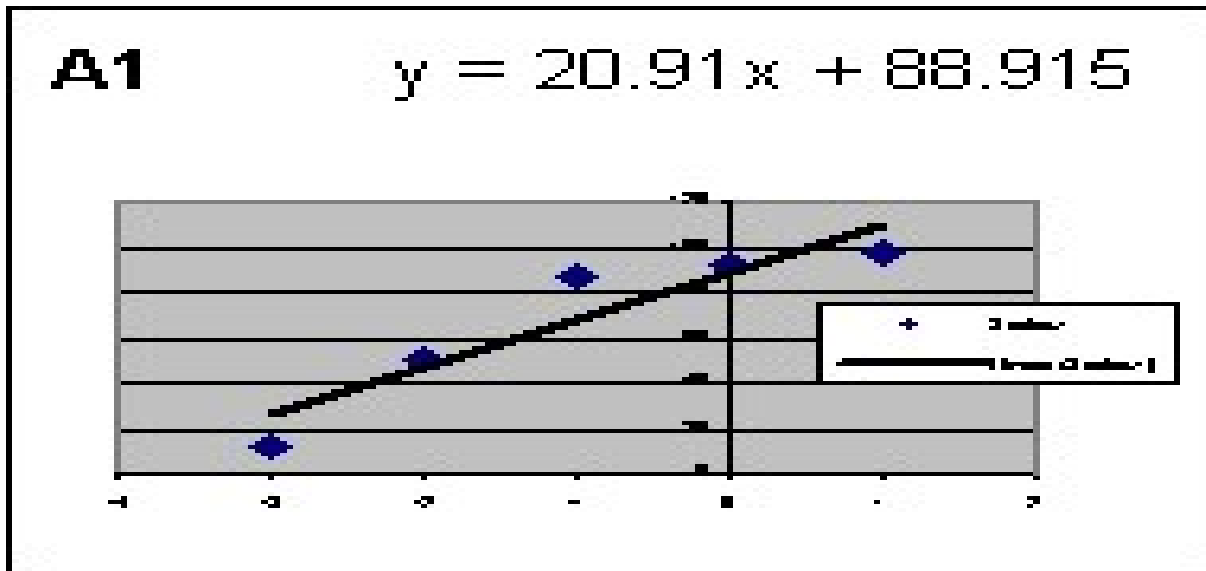

**A2**

$$y = 26.076x + 75.491$$

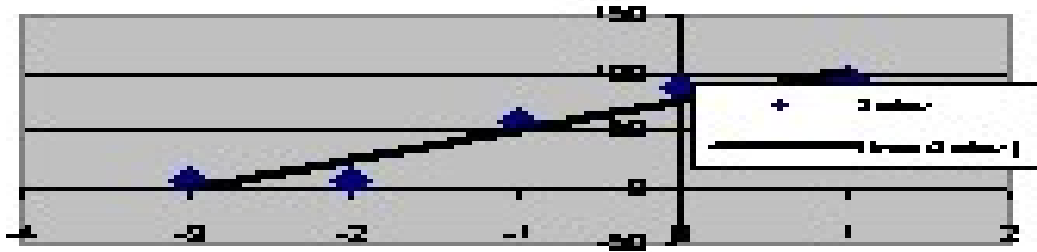

**A3**

$$y = 21.943x + 86.536$$

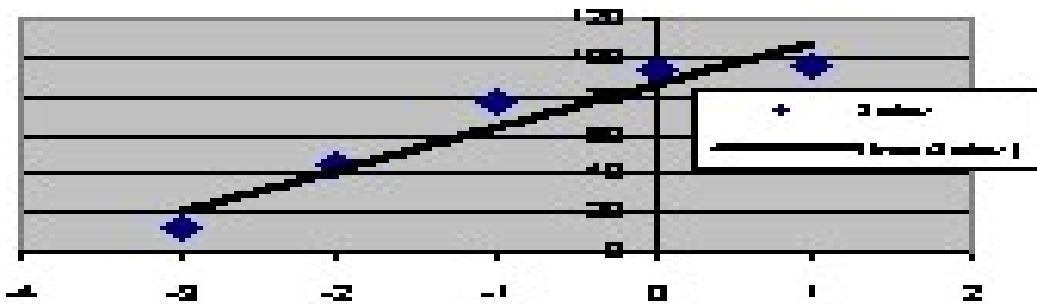

**A5**

$$y = 24.825x + 77.75$$

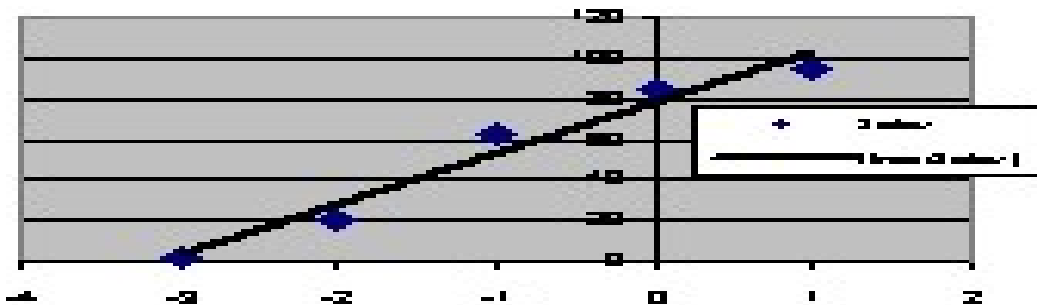

**A6**

$$y = 26.517x + 75.779$$

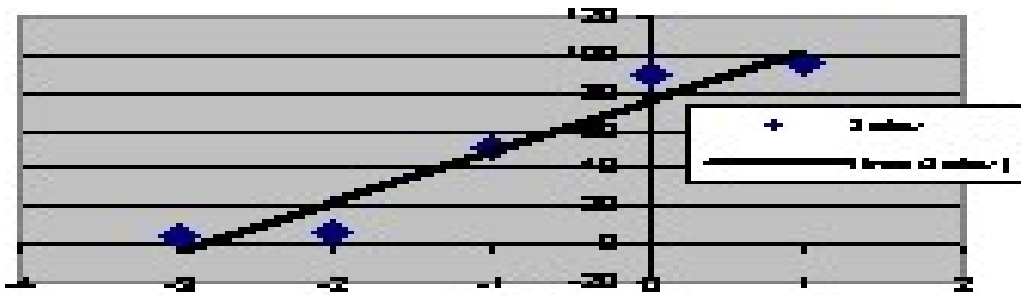

**A7**

$$y = 21.932x + 81.252$$

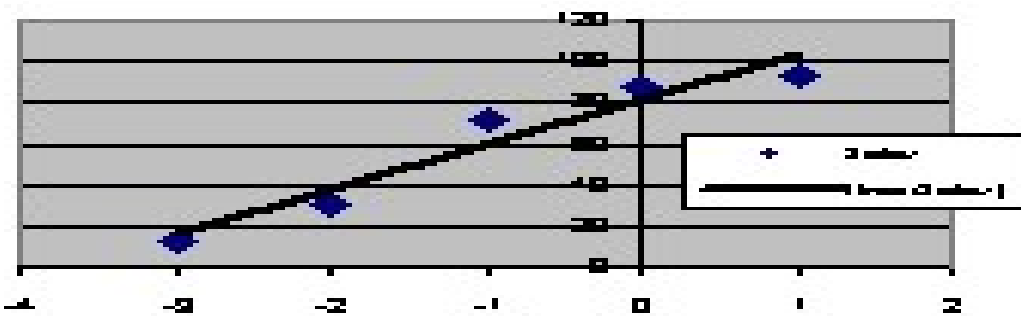

**A8**

$$y = 25.556x + 75.173$$

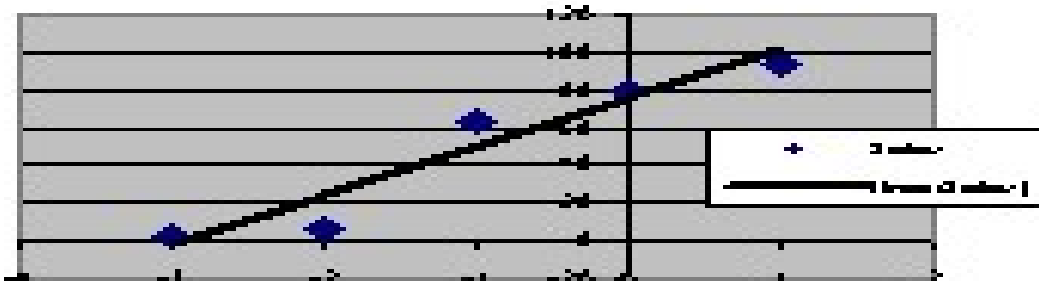

**A9**

$$y = 23.535x + 80.227$$

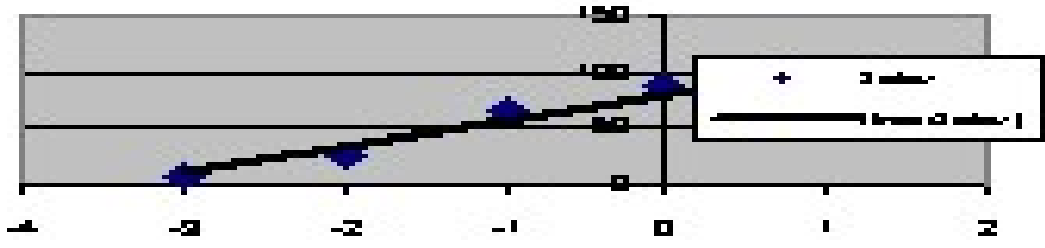

**ST**

$$y = 24.01x + 67.591$$

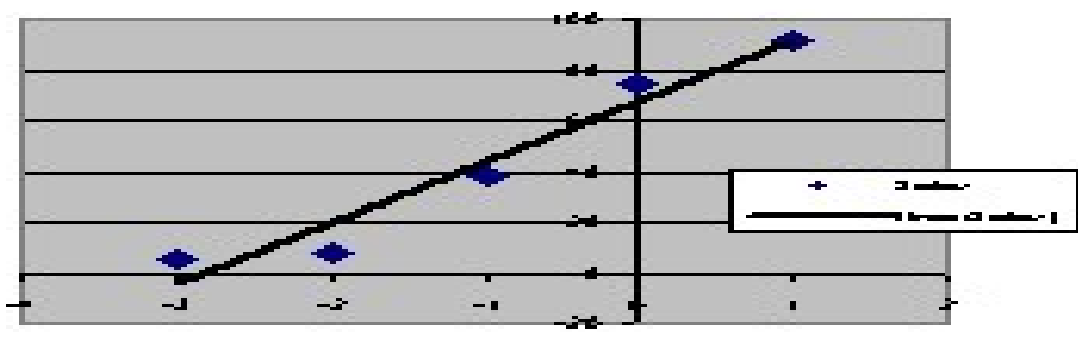

**Remdesivir**

$$y = 20.793x + 91.63$$

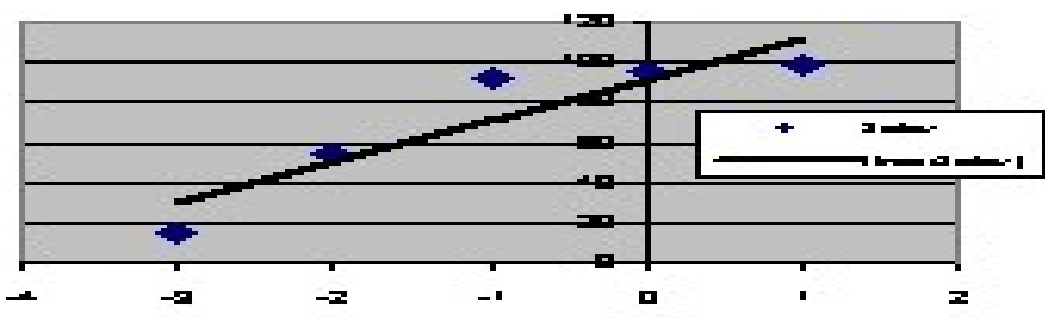



## Quantitation Report

### Experiment Information

|                         |                             |
|-------------------------|-----------------------------|
| Run Name                | 2021-12-08 (1)              |
| Run Start               | 08/12/2021 06:12:15 PM      |
| Run Finish              | 08/12/2021 08:46:29 PM      |
| Operator                | NE                          |
| Notes                   |                             |
| Run On Software Version | Rotor-Gene 1.7.87           |
| Run Signature           | The Run Signature is valid. |
| Gain Green              | 5.                          |
| Gain Yellow             | 5.                          |

### Quantitation data

#### Legend:

NEG (NTC) - Sample cancelled due to NTC Threshold.

NEG (R. Eff) - Sample cancelled as efficiency less than reaction efficiency threshold.

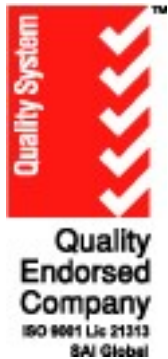

This report generated by Rotor-Gene 6000 Series Software 1.7 (Build 87)

Copyright ©2000-2006 Corbett Research, a Division of Corbett Life Science. All rights reserved.

ISO 9001:2000 (Reg. No. QEC21313)

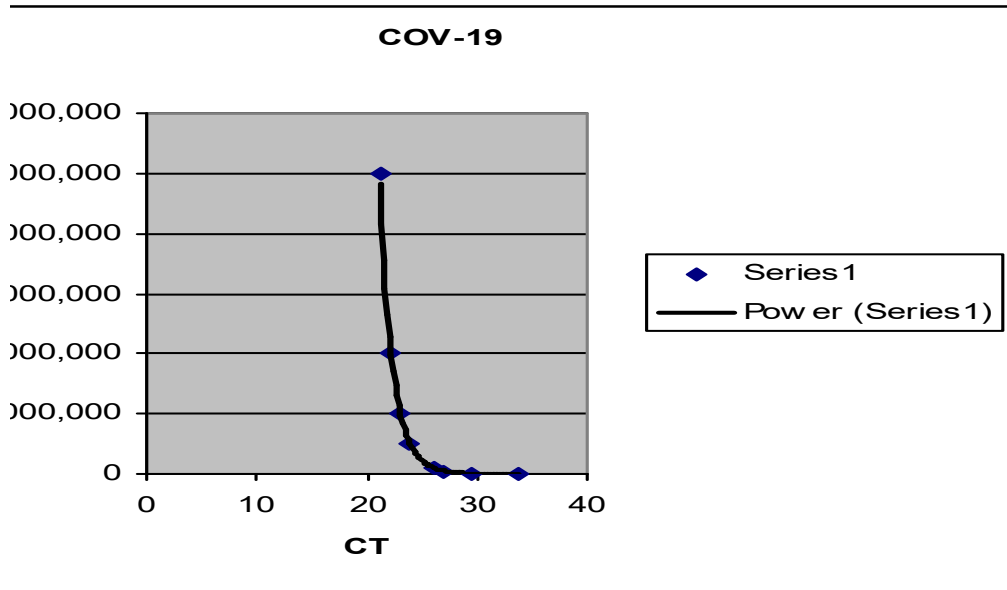

| CT    | V.Titer   |
|-------|-----------|
| 21.18 | 5,000,000 |
| 22.26 | 2,000,000 |
| 23.07 | 1,000,000 |
| 23.91 | 500,000   |
| 26.04 | 100,000   |
| 26.98 | 50,000    |
| 29.44 | 10,000    |
| 33.62 | 1,000     |

### Standard Curve

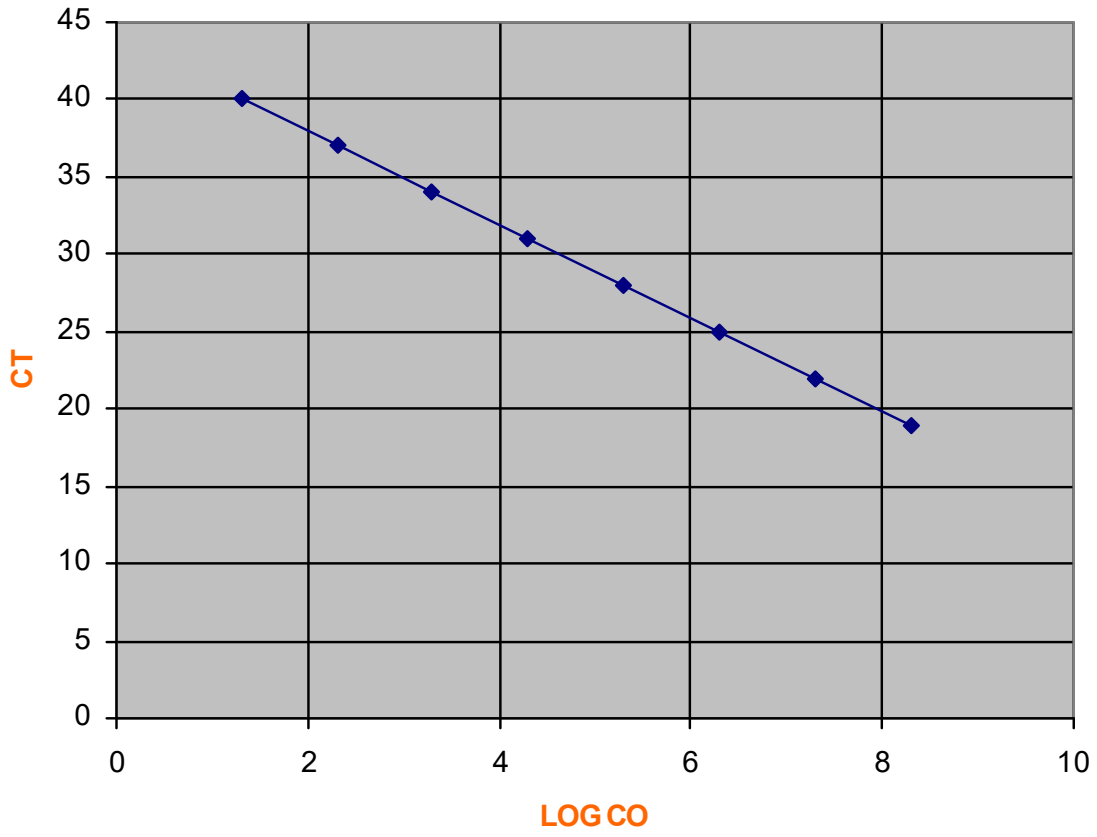

## 2.2 SARS-CoV-2-M<sup>Pro</sup> inhibition assay(GC376)

|            |                          |                                                                         |                    |
|------------|--------------------------|-------------------------------------------------------------------------|--------------------|
| Researcher | : Dr.Hany Emary          | email: <a href="mailto:jan_25_misr@yahoo.com">jan_25_misr@yahoo.com</a> | mob. +966534391522 |
| Assay      | : COV-3CL protease assay |                                                                         |                    |
| Samples    | : 01 compounds.          |                                                                         |                    |
| Cell line  | : ---                    |                                                                         |                    |
| Reference  | : ---                    |                                                                         |                    |

### Lab Report I

| ser | Compound |             | Results                        |         |
|-----|----------|-------------|--------------------------------|---------|
|     | code     | MW<br>g/mol | COV-3CL protease<br>IC50<br>uM | SD<br>± |
| *** | GC376    | 507.53      | 12.85                          | 0.74    |

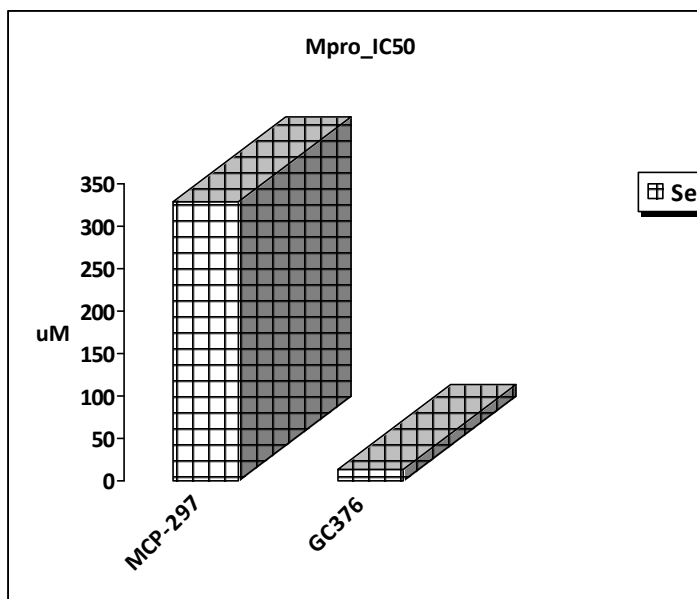

## Detailed results

| code  | IC50 | log     |      | %inh | T2 | T1 | ΔT    | RFU2 | RFU1  | ΔRFU   | slope   | K.Activity |
|-------|------|---------|------|------|----|----|-------|------|-------|--------|---------|------------|
|       |      | conc.uM | conc |      |    |    |       |      |       |        |         |            |
| GC376 | 1000 | 3       | 91   | 30   | 0  | 30 | 8.63  | 0    | 8.63  | 3.3333 | 10.3561 |            |
|       | 100  | 2       | 73   | 30   | 0  | 30 | 26.54 | 0    | 26.54 | 3.3333 | 31.8483 |            |
|       | 10   | 1       | 42   | 30   | 0  | 30 | 58.11 | 0    | 58.11 | 3.3333 | 69.7327 |            |
|       | 1    | 0       | 28   | 30   | 0  | 30 | 72.03 | 0    | 72.03 | 3.3333 | 86.4369 |            |
| EC    |      |         | 0    | 30   | 0  | 30 | 100   | 0    | 100   | 3.3333 | 120     |            |

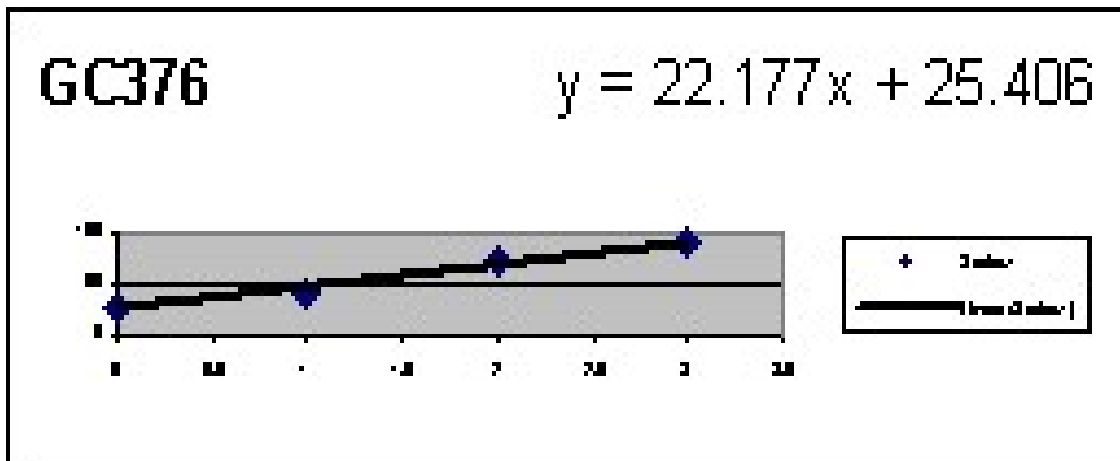

### 2.3 SARS-CoV-2-M<sup>Pro</sup> inhibition assay (Lopinavir)

|            |                          |                                                                         |                    |
|------------|--------------------------|-------------------------------------------------------------------------|--------------------|
| Researcher | : Dr.Hany Emary          | email: <a href="mailto:jan_25_misr@yahoo.com">jan_25_misr@yahoo.com</a> | mob. +966534391522 |
| Assay      | : COV-3CL protease assay |                                                                         |                    |
| Samples    | : 01 compounds.          |                                                                         |                    |
| Cell line  | : ---                    |                                                                         |                    |
| Reference  | : ---                    |                                                                         |                    |

## Lab Report I

| ser | Compound  |             | Results                        |         |
|-----|-----------|-------------|--------------------------------|---------|
|     | code      | MW<br>g/mol | COV-3CL protease<br>IC50<br>uM | SD<br>± |
| *** | Lopinavir | 720.94      | 82.17                          | 7.66    |

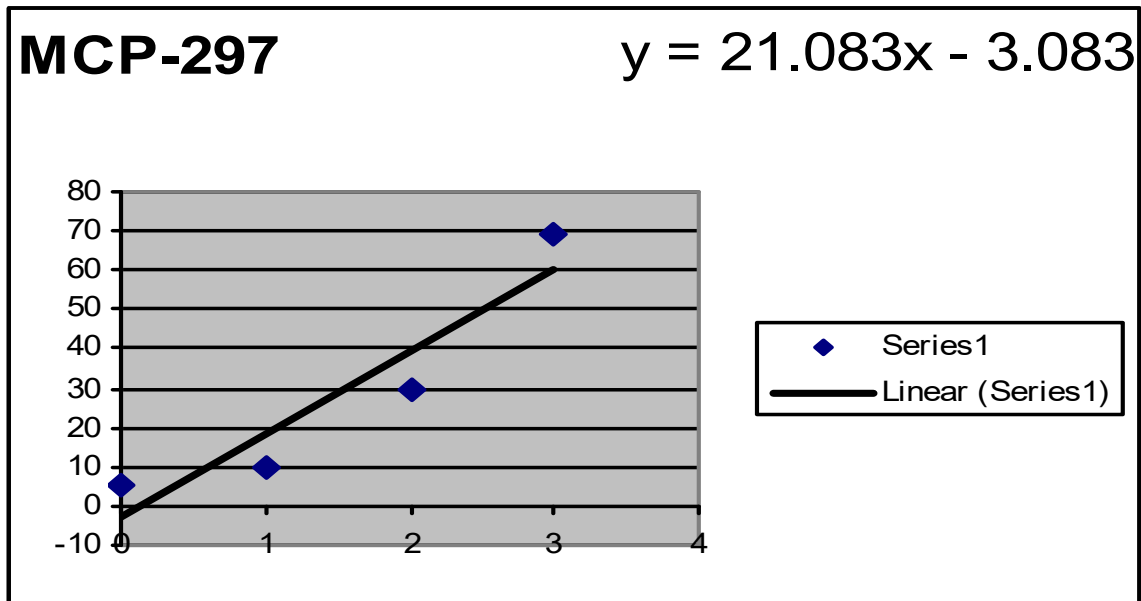

| code      | IC50 | conc | conc | %inh | T2 | T1 | ΔT | RFU2  | RFU1 | ΔRFU  | slope  | K.Activity |
|-----------|------|------|------|------|----|----|----|-------|------|-------|--------|------------|
| Mpro      |      |      |      |      |    |    |    |       |      |       |        |            |
| Lopinavir |      | 1000 | 3    | 69   | 30 | 0  | 30 | 31.18 | 0    | 31.18 | 3.3333 | 37.4164    |
|           |      | 100  | 2    | 30   | 30 | 0  | 30 | 70.02 | 0    | 70.02 | 3.3333 | 84.0248    |
|           |      | 10   | 1    | 10   | 30 | 0  | 30 | 89.75 | 0    | 89.75 | 3.3333 | 107.701    |
|           |      | 1    | 0    | 5.1  | 30 | 0  | 30 | 94.88 | 0    | 94.88 | 3.3333 | 113.857    |
| EC        |      |      |      | 0    | 30 | 0  | 30 | 100   | 0    | 100   | 3.3333 | 120        |

Det  
ails  
d  
resu  
lts

## 2.4 SARS-CoV-2-M<sup>Pro</sup> inhibition assay of new compounds

|            |                          |                                                                         |                    |
|------------|--------------------------|-------------------------------------------------------------------------|--------------------|
| Researcher | : Dr.Hany Emary          | email: <a href="mailto:jan_25_misr@yahoo.com">jan_25_misr@yahoo.com</a> | mob. +966534391522 |
| Assay      | : COV-3CL protease assay |                                                                         |                    |
| Samples    | : 10 compounds.          |                                                                         |                    |
| Cell line  | : ---                    |                                                                         |                    |
| Reference  | : ---                    |                                                                         |                    |

### Lab Report I

| ser | Compound |             | Results                        |         |
|-----|----------|-------------|--------------------------------|---------|
|     | code     | MW<br>g/mol | COV-3CL protease<br>IC50<br>uM | SD<br>± |
| 1   | 17       | 333.11      | 329.5                          | 15.5    |
| 2   | 21       | 412.42      | 25.36                          | 2.4     |
| 3   | 22       | 352.78      | 236.5                          | 4.29    |
| 4   | 23       | 360.37      | 65.92                          | 12.3    |
| 5   | 24       | 346.39      | 82.17                          | 15      |
| 6   | 25       | 411.26      | 5.426                          | 21.3    |
| 7   | 26       | 376.37      | 407.5                          | 3.44    |
| 8   | 27       | 380.83      | 165.2                          | 16.7    |
| 9   | 28       | 425.29      | 45.96                          | 8.62    |
| 10  | 29       | 375.43      | 3.22                           | 2.83    |



|     |           |        |       |      |
|-----|-----------|--------|-------|------|
| *** | Lopinavir | 720.94 | 82.17 | 7.66 |
| *** | GC376     | 507.53 | 12.85 | 0.74 |

## Detailed results

|      |                         | Equation |         |     |    |   |     |      |      |       |            |        |         |
|------|-------------------------|----------|---------|-----|----|---|-----|------|------|-------|------------|--------|---------|
| Mpro | code                    | IC50     | conc    | %in | T  | Δ | RFU | RFU  | ΔRFU | slope | K.Activity |        |         |
|      |                         | 0        | conc    | h   | T2 | 1 | T   | RFU2 | 1    | ΔRFU  | y          |        |         |
| 29   | <b>Y=20.494x+39.507</b> |          | 1000    | 3   | 96 | 0 | 0   | 30   | 3    | 0     | 3          | 3.3333 | 37.2364 |
|      |                         |          | 100     | 2   | 71 | 0 | 0   | 30   | 2    | 0     | 2          | 3.3333 | 83.0648 |
|      |                         |          | 10      | 1   | 42 | 0 | 0   | 30   | 6    | 0     | 6          | 3.3333 | 100.153 |
|      |                         |          | 1       | 0   | 31 | 0 | 0   | 30   | 2    | 0     | 2          | 3.3333 | 111.265 |
|      |                         |          |         |     |    |   |     |      |      |       |            |        |         |
| EC   |                         |          |         | 0   | 0  | 0 | 30  | 100  | 0    | 100   | 3.3333     | 120    |         |
|      |                         | IC50     | log     | %in | T  | Δ | RFU | RFU  | ΔRFU | slope | K.Activity |        |         |
|      | code                    | 0        | conc.uM | h   | T2 | 1 | T   | RFU2 | 1    | ΔRFU  | y          |        |         |
| 24   | <b>Y=21.541x+8.7551</b> |          | 1000    | 3   | 76 | 0 | 0   | 30   | 2    | 0     | 2          | 3.3333 | 28.3443 |
|      |                         |          | 100     | 2   | 49 | 0 | 0   | 30   | 4    | 0     | 4          | 3.3333 | 61.7286 |
|      |                         |          | 10      | 1   | 28 | 0 | 0   | 30   | 5    | 0     | 5          | 3.3333 | 86.5809 |
|      |                         |          | 1       | 0   | 11 | 3 | 0   | 30   | 88.5 | 0     | 88.5       | 3.3333 | 106.225 |

| code                    | IC50 | log conc | %in | T2 | T1 | Δ T | RFU2 | RFU1 | ΔRFU | slope  | K.Activit y |
|-------------------------|------|----------|-----|----|----|-----|------|------|------|--------|-------------|
| EC                      |      |          | 0   | 0  | 0  | 30  | 100  | 0    | 100  | 3.3333 | 120         |
| 22                      |      |          |     |    |    |     |      |      |      |        |             |
| <b>Y=21.211x-0.35</b>   |      |          |     |    |    |     |      |      |      |        |             |
|                         | 1000 | 3        | 72  | 0  | 0  | 30  | 1    | 0    | 1    | 3.3333 | 33.9723     |
|                         | 100  | 2        | 33  | 0  | 0  | 30  | 3    | 0    | 3    | 3.3333 | 80.4368     |
|                         | 10   | 1        | 14  | 0  | 0  | 30  | 5    | 0    | 5    | 3.3333 | 103.381     |
|                         | 1    | 0        | 7.4 | 0  | 0  | 30  | 4    | 0    | 4    | 3.3333 | 111.169     |
| EC                      |      |          | 0   | 0  | 0  | 30  | 100  | 0    | 100  | 3.3333 | 120         |
| 23                      |      |          |     |    |    |     |      |      |      |        |             |
| <b>Y=21.829x+10.293</b> |      |          |     |    |    |     |      |      |      |        |             |
|                         | 1000 | 3        | 80  | 0  | 0  | 30  | 3    | 0    | 3    | 3.3333 | 23.7962     |
|                         | 100  | 2        | 50  | 0  | 0  | 30  | 1    | 0    | 1    | 3.3333 | 59.4126     |
|                         | 10   | 1        | 26  | 0  | 0  | 30  | 2    | 0    | 2    | 3.3333 | 88.9449     |
|                         | 1    | 0        | 16  | 0  | 0  | 30  | 9    | 0    | 9    | 3.3333 | 101.269     |
| EC                      |      |          | 0   | 0  | 0  | 30  | 100  | 0    | 100  | 3.3333 | 120         |

| code                    | IC50 | log conc.uM | %in conc | T2 | T1 | Δ T | RFU2 | RFU1 | ΔRFU | slope  | K.Activity |
|-------------------------|------|-------------|----------|----|----|-----|------|------|------|--------|------------|
| 26                      |      |             |          | 3  |    |     | 36.2 |      | 36.2 |        |            |
| <b>Y=23.948x-12.50</b>  | 1000 | 3           | 64       | 0  | 0  | 30  | 9    | 0    | 9    | 3.3333 | 43.5484    |
|                         | 100  | 2           | 33       | 0  | 0  | 30  | 1    | 0    | 1    | 3.3333 | 80.2928    |
|                         | 10   | 1           | 8.7      | 0  | 0  | 30  | 4    | 0    | 4    | 3.3333 | 109.609    |
|                         | 1    | 0           | 3.5      | 0  | 0  | 30  | 6    | 0    | 6    | 3.3333 | 115.753    |
| EC                      |      |             | 0        | 0  | 0  | 30  | 100  | 0    | 100  | 3.3333 | 120        |
|                         |      |             |          |    |    |     |      |      |      |        |            |
| code                    | IC50 | log conc.uM | %in conc | T2 | T1 | Δ T | RFU2 | RFU1 | ΔRFU | slope  | K.Activity |
| 17                      |      |             |          | 3  |    |     | 16.2 |      | 16.2 |        |            |
| <b>Y=22.785x-7.349</b>  | 1000 | 3           | 62       | 0  | 0  | 30  | 6    | 0    | 6    | 3.3333 | 19.5122    |
|                         | 100  | 2           | 33       | 0  | 0  | 30  | 3    | 0    | 3    | 3.3333 | 55.5966    |
|                         | 10   | 1           | 18       | 0  | 0  | 30  | 1    | 0    | 1    | 3.3333 | 87.0129    |
|                         | 1    | 0           | 10       | 0  | 0  | 30  | 6    | 0    | 6    | 3.3333 | 104.833    |
| EC                      |      |             | 0        | 0  | 0  | 30  | 100  | 0    | 100  | 3.3333 | 120        |
|                         |      |             |          |    |    |     |      |      |      |        |            |
| code                    | IC50 | log conc.uM | %in conc | T2 | T1 | Δ T | RFU2 | RFU1 | ΔRFU | slope  | K.Activity |
| 21                      |      |             |          | 3  |    |     | 28.9 |      | 28.9 |        |            |
| <b>Y=21.525x+19.649</b> | 1000 | 3           | 71       | 0  | 0  | 30  | 2    | 0    | 2    | 3.3333 | 34.7043    |

|                         |      |         |      |   |    |     |     |      |     |        |         |   |
|-------------------------|------|---------|------|---|----|-----|-----|------|-----|--------|---------|---|
|                         |      |         |      |   | 3  |     |     | 73.2 |     | 73.2   |         |   |
|                         | 100  | 2       | 27   | 0 | 0  | 30  | 2   | 0    | 2   | 3.3333 | 87.8649 |   |
|                         |      |         |      |   | 3  |     |     | 89.6 |     | 89.6   |         |   |
|                         | 10   | 1       | 10   | 0 | 0  | 30  | 1   | 0    | 1   | 3.3333 | 107.533 |   |
|                         |      |         |      |   | 3  |     |     | 97.1 |     | 97.1   |         |   |
|                         | 1    | 0       | 2.9  | 0 | 0  | 30  | 3   | 0    | 3   | 3.3333 | 116.557 |   |
| EC                      |      |         | 0    | 0 | 0  | 30  | 100 | 0    | 100 | 3.3333 | 120     |   |
|                         |      |         |      |   |    |     |     |      |     |        |         |   |
|                         | IC5  | log     | %in  | T | Δ  | RFU |     |      |     |        |         |   |
| code                    | 0    | conc.uM | conc | h | T2 | 1   | T   | RFU2 | 1   | ΔRFU   | slope   | y |
| 27                      |      |         |      |   | 3  |     |     | 24.5 |     | 24.5   |         |   |
| <b>Y=20.858x+3.736</b>  | 1000 | 3       | 75   | 0 | 0  | 30  | 1   | 0    | 1   | 3.3333 | 29.4123 |   |
|                         |      |         |      |   | 3  |     |     | 63.2 |     | 63.2   |         |   |
|                         | 100  | 2       | 37   | 0 | 0  | 30  | 7   | 0    | 7   | 3.3333 | 75.9248 |   |
|                         |      |         |      |   | 3  |     |     | 84.1 |     | 84.1   |         |   |
|                         | 10   | 1       | 16   | 0 | 0  | 30  | 3   | 0    | 3   | 3.3333 | 100.957 |   |
|                         |      |         |      |   | 3  |     |     | 93.5 |     | 93.5   |         |   |
|                         | 1    | 0       | 6.4  | 0 | 0  | 30  | 6   | 0    | 6   | 3.3333 | 112.273 |   |
| EC                      |      |         | 0    | 0 | 0  | 30  | 100 | 0    | 100 | 3.3333 | 120     |   |
|                         |      |         |      |   |    |     |     |      |     |        |         |   |
|                         | IC5  | log     | %in  | T | Δ  | RFU |     |      |     |        |         |   |
| code                    | 0    | conc.uM | conc | h | T2 | 1   | T   | RFU2 | 1   | ΔRFU   | slope   | y |
| 28                      |      |         |      |   | 3  |     |     | 17.9 |     | 17.9   |         |   |
| <b>Y=21.665x+14.036</b> | 1000 | 3       | 82   | 0 | 0  | 30  | 4   | 0    | 4   | 3.3333 | 21.5282 |   |
|                         |      |         |      |   | 3  |     |     | 41.4 |     | 41.4   |         |   |
|                         | 100  | 2       | 59   | 0 | 0  | 30  | 6   | 0    | 6   | 3.3333 | 49.7525 |   |
|                         |      |         |      |   | 3  |     |     | 69.8 |     | 69.8   |         |   |
|                         | 10   | 1       | 30   | 0 | 0  | 30  | 5   | 0    | 5   | 3.3333 | 83.8208 |   |

| code                    | IC50 | log conc | %in  | T | Δ  | RFU | K.Activit |      |   |      |        |         |
|-------------------------|------|----------|------|---|----|-----|-----------|------|---|------|--------|---------|
| code                    | 0    | conc.uM  | conc | h | T2 | 1   | T         | RFU2 | 1 | ΔRFU | slope  | y       |
| EC                      |      |          |      |   | 3  |     | 30        | 85.8 |   | 85.8 |        |         |
|                         | 1    | 0        | 14   | 0 | 0  | 0   | 30        | 2    | 0 | 2    | 3.3333 | 102.985 |
| EC                      |      |          |      |   | 3  |     | 30        | 100  | 0 | 100  | 3.3333 | 120     |
| <b>21</b>               |      |          |      |   | 3  |     | 30        | 29.4 |   | 29.4 |        |         |
| <b>Y=21.525x+19.649</b> | 1000 | 3        | 91   | 0 | 0  | 0   | 30        | 6    | 0 | 6    | 3.3333 | 35.3524 |
|                         | 100  | 2        | 77   | 0 | 0  | 0   | 30        | 2    | 0 | 2    | 3.3333 | 78.1448 |
|                         | 10   | 1        | 42   | 0 | 0  | 0   | 30        | 2    | 0 | 2    | 3.3333 | 109.225 |
|                         | 1    | 0        | 22   | 0 | 0  | 0   | 30        | 4    | 0 | 4    | 3.3333 | 115.729 |
| EC                      |      |          |      |   | 3  |     | 30        | 100  | 0 | 100  | 3.3333 | 120     |
| <b>Lopinavir</b>        |      |          |      |   | 3  |     | 30        | 23.7 |   | 23.7 |        |         |
| <b>Y=22.687x+0.846</b>  | 1000 | 3        | 76   | 0 | 0  | 0   | 30        | 2    | 0 | 2    | 3.3333 | 28.4643 |
|                         | 100  | 2        | 37   | 0 | 0  | 0   | 30        | 4    | 0 | 4    | 3.3333 | 75.0488 |
|                         | 10   | 1        | 19   | 0 | 0  | 0   | 30        | 6    | 0 | 6    | 3.3333 | 97.273  |
|                         | 1    | 0        | 6.8  | 0 | 0  | 0   | 30        | 7    | 0 | 7    | 3.3333 | 111.805 |
| EC                      |      |          |      |   | 3  |     | 30        | 100  | 0 | 100  | 3.3333 | 120     |

| code  | IC50                    | log     |      | %inh | T2 | T1 | ΔT | RFU2  | RFU1 | ΔRFU  | slope  | K.Activity |
|-------|-------------------------|---------|------|------|----|----|----|-------|------|-------|--------|------------|
|       |                         | conc.uM | conc |      |    |    |    |       |      |       |        |            |
| GC376 |                         |         |      |      |    |    |    |       |      |       |        |            |
|       | <b>Y=22.177x+25.406</b> | 1000    | 3    | 91   | 30 | 0  | 30 | 8.63  | 0    | 8.63  | 3.3333 | 10.3561    |
|       |                         | 100     | 2    | 73   | 30 | 0  | 30 | 26.54 | 0    | 26.54 | 3.3333 | 31.8483    |
|       |                         | 10      | 1    | 42   | 30 | 0  | 30 | 58.11 | 0    | 58.11 | 3.3333 | 69.7327    |
|       |                         | 1       | 0    | 28   | 30 | 0  | 30 | 72.03 | 0    | 72.03 | 3.3333 | 86.4369    |
| EC    |                         |         |      | 0    | 30 | 0  | 30 | 100   | 0    | 100   | 3.3333 | 120        |
|       |                         |         |      |      |    |    |    |       |      |       |        |            |

## 2.5 Vero cells Cytotoxicity Assay

|            |                          |                                                                         |                    |
|------------|--------------------------|-------------------------------------------------------------------------|--------------------|
| Researcher | : Dr.Hany Emary          | email: <a href="mailto:jan_25_misr@yahoo.com">jan_25_misr@yahoo.com</a> | mob. +966534391522 |
| Assay      | : MTT cytotoxicity assay |                                                                         |                    |
| Samples    | : 9 compounds.           |                                                                         |                    |
| Cell lines | : ----                   |                                                                         |                    |

## Lab REPORT I

\* Cytotoxicity results

| Ser | Sample |             | Cytotoxicity |      |
|-----|--------|-------------|--------------|------|
|     | code   | MW<br>g/mol | IC50         | SD   |
|     |        |             | uM           | ±    |
|     |        |             | Vero         |      |
| 1   | ST     | 333.35      | 201 . 55     | 5.47 |
| 2   | 21     | 412.42      | 48 . 8       | 3.72 |
| 3   | 22     | 352.77      | 193          | 14.7 |
| 4   | 23     | 411.25      | 47 . 6       | 3.62 |
| 5   | 24     | 346.36      | 21 . 6       | 1.64 |
| 6   | 25     | 360.37      | 121          | 9.21 |
| 7   | 26     | 375.42      | 87 . 3       | 6.65 |
| 8   | 27     | 380.83      | 64 . 4       | 4.91 |

|     |            |        |      |      |
|-----|------------|--------|------|------|
| 9   | 28         | 425.28 | 139  | 10.6 |
| 10  | 29         | 376.37 | 151  | 11.5 |
| *** | Remdesivir | 602.6  | 43.1 | 3.28 |

**Detailed Results**

researcher                      assay                      Date                      cells  
 Dr.Hany Emary                      MTT                      04-Sep

|   | Blank | CC | Sample No. 17/Vero |      |       |       | Sample No. 21/Vero |       |      |       |       |       |
|---|-------|----|--------------------|------|-------|-------|--------------------|-------|------|-------|-------|-------|
|   | 1     | 2  | 3                  | 4    | 5     | 6     | 7                  | 8     | 9    | 10    | 11    | 12    |
| A | B     | C  | 100uM              | 25uM | 6.3uM | 1.6uM | 0.4uM              | 100uM | 25uM | 6.3uM | 1.6uM | 0.4uM |
| B | B     | C  | 100uM              | 25uM | 6.3uM | 1.6uM | 0.4uM              | 100uM | 25uM | 6.3uM | 1.6uM | 0.4uM |
| C | B     | C  | 100uM              | 25uM | 6.3uM | 1.6uM | 0.4uM              | 100uM | 25uM | 6.3uM | 1.6uM | 0.4uM |

ROBONIK P2000 eia reader

Wave length:

560                      450 nm

Reference: 630 nm

|  |   |   |   |   |   |   |   |   |   |    |    |    |
|--|---|---|---|---|---|---|---|---|---|----|----|----|
|  | 1 | 2 | 3 | 4 | 5 | 6 | 7 | 8 | 9 | 10 | 11 | 12 |
|--|---|---|---|---|---|---|---|---|---|----|----|----|

|      |        |       |        |       |        |        |        |        |        |        |        |        |
|------|--------|-------|--------|-------|--------|--------|--------|--------|--------|--------|--------|--------|
| A    | 0.001  | 0.535 | 0.242  | 0.313 | 0.364  | 0.418  | 0.463  | 0.202  | 0.267  | 0.321  | 0.374  | 0.419  |
| B    | 0.001  | 0.529 | 0.253  | 0.319 | 0.354  | 0.424  | 0.467  | 0.189  | 0.263  | 0.319  | 0.379  | 0.415  |
| C    | 0.001  | 0.541 | 0.258  | 0.305 | 0.358  | 0.425  | 0.458  | 0.208  | 0.265  | 0.332  | 0.373  | 0.424  |
| mean | 0.0004 | 0.535 | 0.251  | 0.312 | 0.3587 | 0.4223 | 0.4627 | 0.1997 | 0.265  | 0.324  | 0.3753 | 0.4193 |
| %    |        |       | 46.916 | 58.38 | 67.04  | 78.941 | 86.48  | 37.321 | 49.533 | 60.561 | 70.156 | 78.38  |

17/Vero

21/Vero



|           |             |
|-----------|-------------|
| log conc. | % viability |
| 2         | 46.916      |
| 1.398     | 58.38       |
| 0.796     | 67.04       |
| 0.193     | 78.941      |
| -0.41     | 86.48       |

|           |             |
|-----------|-------------|
| log conc. | % viability |
| 2         | 37.321      |
| 1.3979    | 49.533      |
| 0.7959    | 60.561      |
| 0.1931    | 70.156      |
| -         |             |
| 0.4089    | 78.38       |

IC50=

IC50=

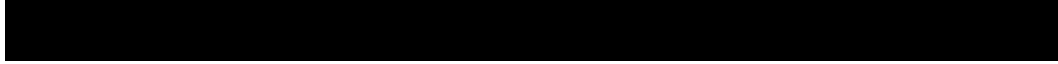

|   | Blank | CC | Sample No. 22/Vero |      |       |       |       | Sample No. 23/Vero |      |       |       |       |
|---|-------|----|--------------------|------|-------|-------|-------|--------------------|------|-------|-------|-------|
|   | 1     | 2  | 3                  | 4    | 5     | 6     | 7     | 8                  | 9    | 10    | 11    | 12    |
| A | B     | C  | 100uM              | 25uM | 6.3uM | 1.6uM | 0.4uM | 100uM              | 25uM | 6.3uM | 1.6uM | 0.4uM |
| B | B     | C  | 100uM              | 25uM | 6.3uM | 1.6uM | 0.4uM | 100uM              | 25uM | 6.3uM | 1.6uM | 0.4uM |
| C | B     | C  | 100uM              | 25uM | 6.3uM | 1.6uM | 0.4uM | 100uM              | 25uM | 6.3uM | 1.6uM | 0.4uM |

ROBONIK P2000 eia reader

Wave length:

560

450 nm

Reference: 630 nm

|  | 1 | 2 | 3 | 4 | 5 | 6 | 7 | 8 | 9 | 10 | 11 | 12 |
|--|---|---|---|---|---|---|---|---|---|----|----|----|
|--|---|---|---|---|---|---|---|---|---|----|----|----|

|      |       |       |        |       |        |       |       |       |        |        |        |       |
|------|-------|-------|--------|-------|--------|-------|-------|-------|--------|--------|--------|-------|
| A    | 0.001 | 0.492 | 0.275  | 0.341 | 0.389  | 0.428 | 0.469 | 0.257 | 0.318  | 0.362  | 0.424  | 0.461 |
| B    | 0.001 | 0.518 | 0.262  | 0.338 | 0.382  | 0.435 | 0.467 | 0.263 | 0.326  | 0.354  | 0.435  | 0.474 |
| C    | 0.001 | 0.526 | 0.268  | 0.329 | 0.391  | 0.439 | 0.465 | 0.266 | 0.323  | 0.357  | 0.438  | 0.481 |
| mean | 0.001 | 0.512 | 0.2683 | 0.336 | 0.3873 | 0.434 | 0.467 | 0.262 | 0.3223 | 0.3577 | 0.4323 | 0.472 |

|             |         |  |        |       |        |        |         |        |        |        |       |        |
|-------------|---------|--|--------|-------|--------|--------|---------|--------|--------|--------|-------|--------|
| % viability |         |  | 52.409 | 65.63 | 75.651 | 84.766 | 91.211  | 51.172 | 62.956 | 69.857 | 84.44 | 92.188 |
|             | 22/Vero |  |        |       |        |        | 23/Vero |        |        |        |       |        |

| log conc. | % viability |
|-----------|-------------|
| 2         | 52.409      |
| 1.398     | 65.625      |
| 0.796     | 75.651      |
| 0.193     | 84.766      |
| -0.41     | 91.211      |

| log conc. | % viability |
|-----------|-------------|
| 2         | 51.172      |
| 1.3979    | 62.956      |
| 0.7959    | 69.857      |
| 0.1931    | 84.44       |
| -         |             |
| 0.4089    | 92.188      |

IC50=

IC50=

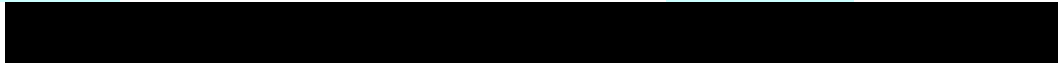

|   | Blank | CC | Sample No. 24/Vero |      |       |       |       | Sample No. 25/Vero |      |       |       |       |
|---|-------|----|--------------------|------|-------|-------|-------|--------------------|------|-------|-------|-------|
|   | 1     | 2  | 3                  | 4    | 5     | 6     | 7     | 8                  | 9    | 10    | 11    | 12    |
| A | B     | C  | 100uM              | 25uM | 6.3uM | 1.6uM | 0.4uM | 100uM              | 25uM | 6.3uM | 1.6uM | 0.4uM |
| B | B     | C  | 100uM              | 25uM | 6.3uM | 1.6uM | 0.4uM | 100uM              | 25uM | 6.3uM | 1.6uM | 0.4uM |
| C | B     | C  | 100uM              | 25uM | 6.3uM | 1.6uM | 0.4uM | 100uM              | 25uM | 6.3uM | 1.6uM | 0.4uM |

ROBONIK P2000 eia reader

Wave length:

560 450 nm

Reference: 630 nm

|  | 1 | 2 | 3 | 4 | 5 | 6 | 7 | 8 | 9 | 10 | 11 | 12 |
|--|---|---|---|---|---|---|---|---|---|----|----|----|
|--|---|---|---|---|---|---|---|---|---|----|----|----|

|   |       |       |       |       |       |       |       |       |       |       |       |       |
|---|-------|-------|-------|-------|-------|-------|-------|-------|-------|-------|-------|-------|
| A | 0.001 | 0.545 | 0.281 | 0.334 | 0.383 | 0.431 | 0.482 | 0.234 | 0.296 | 0.346 | 0.419 | 0.464 |
| B | 0.003 | 0.527 | 0.277 | 0.326 | 0.379 | 0.442 | 0.477 | 0.228 | 0.294 | 0.344 | 0.427 | 0.458 |

|             |        |       |        |       |        |        |        |        |        |        |        |        |
|-------------|--------|-------|--------|-------|--------|--------|--------|--------|--------|--------|--------|--------|
| C           | 0.001  | 0.493 | 0.267  | 0.329 | 0.387  | 0.445  | 0.496  | 0.226  | 0.286  | 0.347  | 0.423  | 0.537  |
| mean        | 0.0017 | 0.522 | 0.275  | 0.33  | 0.383  | 0.4393 | 0.485  | 0.2293 | 0.292  | 0.3457 | 0.423  | 0.4863 |
| % viability |        |       | 52.716 | 63.19 | 73.419 | 84.217 | 92.971 | 43.962 | 55.974 | 66.262 | 81.086 | 93.227 |

24/Vero

|       |        |
|-------|--------|
| 2     | 52.716 |
| 1.398 | 63.195 |
| 0.796 | 73.419 |
| 0.193 | 84.217 |
| -0.41 | 92.971 |

25/Vero

|        |        |
|--------|--------|
| 2      | 43.962 |
| 1.3979 | 55.974 |
| 0.7959 | 66.262 |
| 0.1931 | 81.086 |
| -      | 93.227 |

IC50=

IC50=

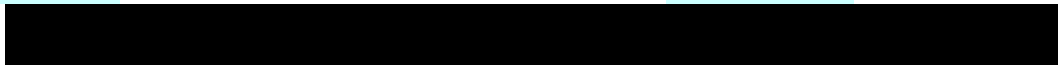

|   | Blank | CC | Sample No. 26/Vero |      |       |       |       | Sample No. 27/Vero |      |       |       |       |
|---|-------|----|--------------------|------|-------|-------|-------|--------------------|------|-------|-------|-------|
|   | 1     | 2  | 3                  | 4    | 5     | 6     | 7     | 8                  | 9    | 10    | 11    | 12    |
| A | B     | C  | 100uM              | 25uM | 6.3uM | 1.6uM | 0.4uM | 100uM              | 25uM | 6.3uM | 1.6uM | 0.4uM |
| B | B     | C  | 100uM              | 25uM | 6.3uM | 1.6uM | 0.4uM | 100uM              | 25uM | 6.3uM | 1.6uM | 0.4uM |
| C | B     | C  | 100uM              | 25uM | 6.3uM | 1.6uM | 0.4uM | 100uM              | 25uM | 6.3uM | 1.6uM | 0.4uM |

ROBONIK P2000 eia reader

Wave length:

560

450 nm

Reference: 630 nm

|  |   |   |   |   |   |   |   |   |   |    |    |    |
|--|---|---|---|---|---|---|---|---|---|----|----|----|
|  | 1 | 2 | 3 | 4 | 5 | 6 | 7 | 8 | 9 | 10 | 11 | 12 |
|--|---|---|---|---|---|---|---|---|---|----|----|----|

|   |       |       |       |       |       |       |       |       |       |       |       |       |
|---|-------|-------|-------|-------|-------|-------|-------|-------|-------|-------|-------|-------|
| A | 0.001 | 0.472 | 0.225 | 0.267 | 0.324 | 0.379 | 0.432 | 0.219 | 0.264 | 0.297 | 0.356 | 0.431 |
|---|-------|-------|-------|-------|-------|-------|-------|-------|-------|-------|-------|-------|

|             |       |       |        |       |        |        |        |        |        |        |        |        |
|-------------|-------|-------|--------|-------|--------|--------|--------|--------|--------|--------|--------|--------|
| B           | 0.001 | 0.449 | 0.221  | 0.265 | 0.319  | 0.382  | 0.461  | 0.221  | 0.269  | 0.305  | 0.364  | 0.416  |
| C           | 0.001 | 0.461 | 0.232  | 0.269 | 0.316  | 0.404  | 0.454  | 0.223  | 0.255  | 0.318  | 0.362  | 0.422  |
| mean        | 0.001 | 0.461 | 0.226  | 0.267 | 0.3197 | 0.3883 | 0.449  | 0.221  | 0.2627 | 0.3067 | 0.3607 | 0.423  |
| % viability |       |       | 49.059 | 57.96 | 69.392 | 84.298 | 97.467 | 47.974 | 57.019 | 66.57  | 78.292 | 91.823 |

26/Vero

| log conc. | % viability |
|-----------|-------------|
| 2         | 49.059      |
| 1.398     | 57.959      |
| 0.796     | 69.392      |
| 0.193     | 84.298      |
| -0.41     | 97.467      |

27/Vero

| log conc. | % viability |
|-----------|-------------|
| 2         | 47.974      |
| 1.3979    | 57.019      |
| 0.7959    | 66.57       |
| 0.1931    | 78.292      |
| -         | 91.823      |

IC50=

IC50=

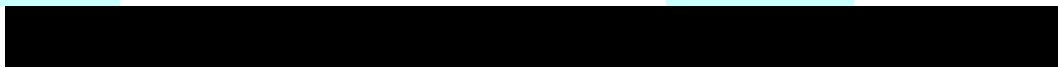

|   | Blank | CC | Sample No. 28/Vero |      |       |       |       | Sample No. 29/Vero |      |       |       |       |
|---|-------|----|--------------------|------|-------|-------|-------|--------------------|------|-------|-------|-------|
|   | 1     | 2  | 3                  | 4    | 5     | 6     | 7     | 8                  | 9    | 10    | 11    | 12    |
| A | B     | C  | 100uM              | 25uM | 6.3uM | 1.6uM | 0.4uM | 100uM              | 25uM | 6.3uM | 1.6uM | 0.4uM |
| B | B     | C  | 100uM              | 25uM | 6.3uM | 1.6uM | 0.4uM | 100uM              | 25uM | 6.3uM | 1.6uM | 0.4uM |
| C | B     | C  | 100uM              | 25uM | 6.3uM | 1.6uM | 0.4uM | 100uM              | 25uM | 6.3uM | 1.6uM | 0.4uM |

ROBONIK P2000 eia reader

Wave length:

560

450 nm

Reference: 630 nm

|  |   |   |   |   |   |   |   |   |   |    |    |    |
|--|---|---|---|---|---|---|---|---|---|----|----|----|
|  | 1 | 2 | 3 | 4 | 5 | 6 | 7 | 8 | 9 | 10 | 11 | 12 |
|--|---|---|---|---|---|---|---|---|---|----|----|----|

|             |        |       |        |       |        |        |        |        |        |        |        |        |
|-------------|--------|-------|--------|-------|--------|--------|--------|--------|--------|--------|--------|--------|
| A           | 0.001  | 0.551 | 0.281  | 0.334 | 0.383  | 0.431  | 0.482  | 0.234  | 0.296  | 0.346  | 0.419  | 0.468  |
| B           | 0.003  | 0.526 | 0.277  | 0.326 | 0.379  | 0.442  | 0.477  | 0.228  | 0.294  | 0.344  | 0.427  | 0.471  |
| C           | 0.001  | 0.507 | 0.267  | 0.329 | 0.387  | 0.445  | 0.496  | 0.226  | 0.286  | 0.347  | 0.423  | 0.453  |
| mean        | 0.0017 | 0.528 | 0.275  | 0.33  | 0.383  | 0.4393 | 0.485  | 0.2293 | 0.292  | 0.3457 | 0.423  | 0.464  |
| % viability |        |       | 52.083 | 62.44 | 72.538 | 83.207 | 91.856 | 43.434 | 55.303 | 65.467 | 80.114 | 87.879 |

28/Vero

|       |        |
|-------|--------|
| 2     | 52.083 |
| 1.398 | 62.437 |
| 0.796 | 72.538 |
| 0.193 | 83.207 |
| -0.41 | 91.856 |

29/Vero

|        |        |
|--------|--------|
| 2      | 43.434 |
| 1.3979 | 55.303 |
| 0.7959 | 65.467 |
| 0.1931 | 80.114 |
| -      |        |
| 0.4089 | 87.879 |

### 3 Docking studies

Entry: 2/19  
mol:

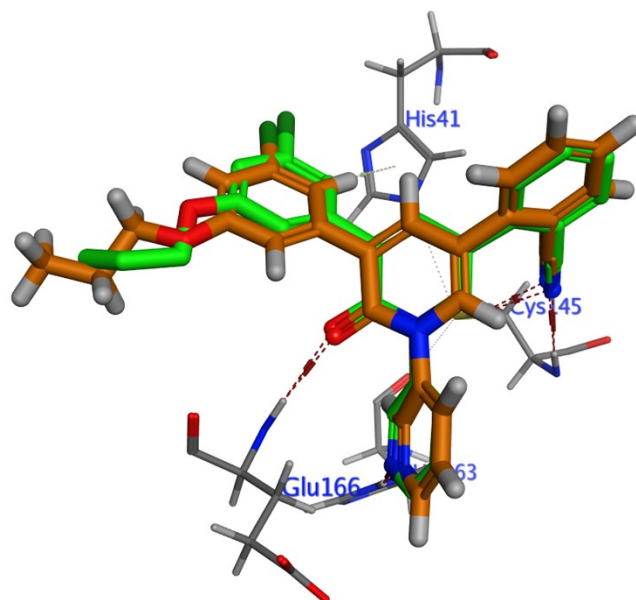

**Figure S1:** Superimposition of the re-docked XF1 conformer (golden) over that of the co-crystallized one (green) with RMSD value of 1.49
