# Supplementary material for: In vitro and computational investigations of novel synthetic carboxamide-linked pyridopyrrolopyrimidines with potent activity as SARS-CoV-2-MPro inhibitors
Source: PubMed Central journal article supplement — RSC Adv. 2022 Sep 22;12(41):26895–907. doi: 10.1039/d2ra04015h (PMC9494209; doi:10.1039/d2ra04015h), 2022-09-22
Supplement: RA-012-D2RA04015H-s002.pdf [file RA-012-D2RA04015H-s002.pdf]

NOA 500 MHz Ultra Shield™

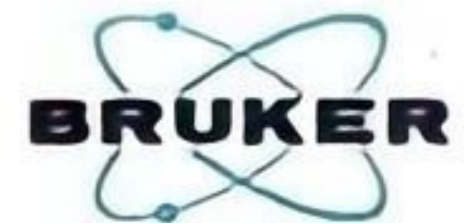

13C (0a)

148.72  
145.72  
141.77  
139.70  
138.62  
131.88  
127.31  
117.84  
111.84  
109.07  
107.16  
129.04  
128.97  
128.28  
128.11  
118.84  
118.43  
118.31  
114.07  
107.16  
32.11  
30.10  
29.02  
28.84  
28.66  
28.61  
28.51  
28.41  
28.31  
28.21  
28.11  
28.01  
27.91  
27.81  
27.71  
27.61  
27.51  
27.41  
27.31  
27.21  
27.11  
27.01  
26.91  
26.81  
26.71  
26.61  
26.51  
26.41  
26.31  
26.21  
26.11  
26.01  
25.91  
25.81  
25.71  
25.61  
25.51  
25.41  
25.31  
25.21  
25.11  
25.01  
24.91  
24.81  
24.71  
24.61  
24.51  
24.41  
24.31  
24.21  
24.11  
24.01  
23.91  
23.81  
23.71  
23.61  
23.51  
23.41  
23.31  
23.21  
23.11  
23.01  
22.91  
22.81  
22.71  
22.61  
22.51  
22.41  
22.31  
22.21  
22.11  
22.01  
21.91  
21.81  
21.71  
21.61  
21.51  
21.41  
21.31  
21.21  
21.11  
21.01  
20.91  
20.81  
20.71  
20.61  
20.51  
20.41  
20.31  
20.21  
20.11  
20.01  
19.91  
19.81  
19.71  
19.61  
19.51  
19.41  
19.31  
19.21  
19.11  
19.01  
18.91  
18.81  
18.71  
18.61  
18.51  
18.41  
18.31  
18.21  
18.11  
18.01  
17.91  
17.81  
17.71  
17.61  
17.51  
17.41  
17.31  
17.21  
17.11  
17.01  
16.91  
16.81  
16.71  
16.61  
16.51  
16.41  
16.31  
16.21  
16.11  
16.01  
15.91  
15.81  
15.71  
15.61  
15.51  
15.41  
15.31  
15.21  
15.11  
15.01  
14.91  
14.81  
14.71  
14.61  
14.51  
14.41  
14.31  
14.21  
14.11  
14.01  
13.91  
13.81  
13.71  
13.61  
13.51  
13.41  
13.31  
13.21  
13.11  
13.01  
12.91  
12.81  
12.71  
12.61  
12.51  
12.41  
12.31  
12.21  
12.11  
12.01  
11.91  
11.81  
11.71  
11.61  
11.51  
11.41  
11.31  
11.21  
11.11  
11.01  
10.91  
10.81  
10.71  
10.61  
10.51  
10.41  
10.31  
10.21  
10.11  
10.01  
9.91  
9.81  
9.71  
9.61  
9.51  
9.41  
9.31  
9.21  
9.11  
9.01  
8.91  
8.81  
8.71  
8.61  
8.51  
8.41  
8.31  
8.21  
8.11  
8.01  
7.91  
7.81  
7.71  
7.61  
7.51  
7.41  
7.31  
7.21  
7.11  
7.01  
6.91  
6.81  
6.71  
6.61  
6.51  
6.41  
6.31  
6.21  
6.11  
6.01  
5.91  
5.81  
5.71  
5.61  
5.51  
5.41  
5.31  
5.21  
5.11  
5.01  
4.91  
4.81  
4.71  
4.61  
4.51  
4.41  
4.31  
4.21  
4.11  
4.01  
3.91  
3.81  
3.71  
3.61  
3.51  
3.41  
3.31  
3.21  
3.11  
3.01  
2.91  
2.81  
2.71  
2.61  
2.51  
2.41  
2.31  
2.21  
2.11  
2.01  
1.91  
1.81  
1.71  
1.61  
1.51  
1.41  
1.31  
1.21  
1.11  
1.01  
0.91  
0.81  
0.71  
0.61  
0.51  
0.41  
0.31  
0.21  
0.11  
0.01

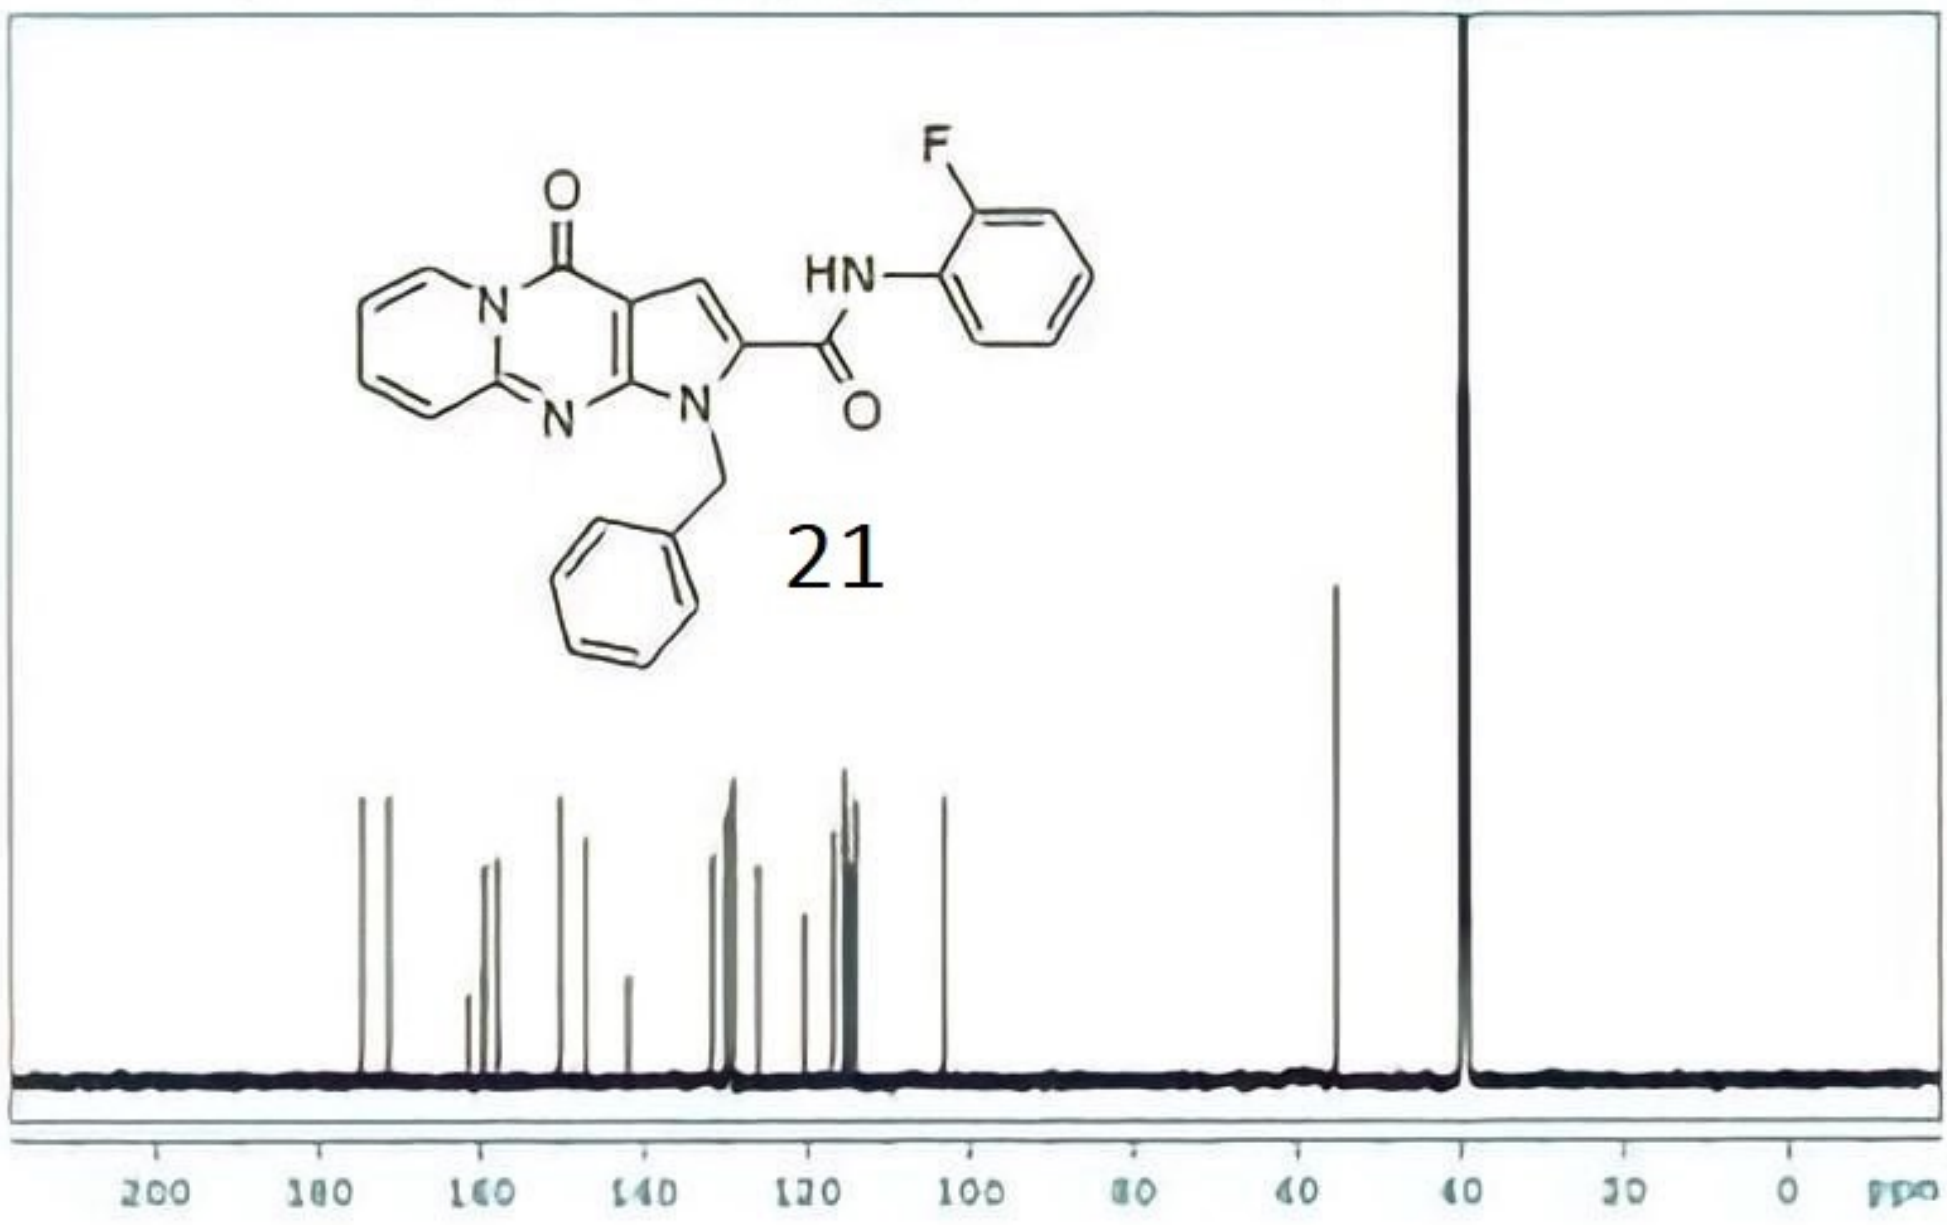

| Chemical Shift (ppm) | Assignment      |
|----------------------|-----------------|
| 148.72               | C=O             |
| 145.72               | C=C             |
| 141.77               | C=C             |
| 139.70               | C=C             |
| 138.62               | C=C             |
| 131.88               | C=C             |
| 127.31               | C=C             |
| 117.84               | C=C             |
| 111.84               | C=C             |
| 109.07               | C=C             |
| 107.16               | C=C             |
| 32.11                | CH <sub>2</sub> |
| 30.10                | CH <sub>2</sub> |
| 29.02                | CH <sub>2</sub> |
| 28.84                | CH <sub>2</sub> |
| 28.66                | CH <sub>2</sub> |
| 28.61                | CH <sub>2</sub> |
| 28.51                | CH <sub>2</sub> |
| 28.41                | CH <sub>2</sub> |
| 28.31                | CH <sub>2</sub> |
| 28.21                | CH <sub>2</sub> |
| 28.11                | CH <sub>2</sub> |
| 28.01                | CH <sub>2</sub> |
| 27.91                | CH <sub>2</sub> |
| 27.81                | CH <sub>2</sub> |
| 27.71                | CH <sub>2</sub> |
| 27.61                | CH <sub>2</sub> |
| 27.51                | CH <sub>2</sub> |
| 27.41                | CH <sub>2</sub> |
| 27.31                | CH <sub>2</sub> |
| 27.21                | CH <sub>2</sub> |
| 27.11                | CH <sub>2</sub> |
| 27.01                | CH <sub>2</sub> |
| 26.91                | CH <sub>2</sub> |
| 26.81                | CH <sub>2</sub> |
| 26.71                | CH <sub>2</sub> |
| 26.61                | CH <sub>2</sub> |
| 26.51                | CH <sub>2</sub> |
| 26.41                | CH <sub>2</sub> |
| 26.31                | CH <sub>2</sub> |
| 26.21                | CH <sub>2</sub> |
| 26.11                | CH <sub>2</sub> |
| 26.01                | CH <sub>2</sub> |
| 25.91                | CH <sub>2</sub> |
| 25.81                | CH <sub>2</sub> |
| 25.71                | CH <sub>2</sub> |
| 25.61                | CH <sub>2</sub> |
| 25.51                | CH <sub>2</sub> |
| 25.41                | CH <sub>2</sub> |
| 25.31                | CH <sub>2</sub> |
| 25.21                | CH <sub>2</sub> |
| 25.11                | CH <sub>2</sub> |
| 25.01                | CH <sub>2</sub> |
| 24.91                | CH <sub>2</sub> |
| 24.81                | CH <sub>2</sub> |
| 24.71                | CH <sub>2</sub> |
| 24.61                | CH <sub>2</sub> |
| 24.51                | CH <sub>2</sub> |
| 24.41                | CH <sub>2</sub> |
| 24.31                | CH <sub>2</sub> |
| 24.21                | CH <sub>2</sub> |
| 24.11                | CH <sub>2</sub> |
| 24.01                | CH <sub>2</sub> |
| 23.91                | CH <sub>2</sub> |
| 23.81                | CH <sub>2</sub> |
| 23.71                | CH <sub>2</sub> |
| 23.61                | CH <sub>2</sub> |
| 23.51                | CH <sub>2</sub> |
| 23.41                | CH <sub>2</sub> |
| 23.31                | CH <sub>2</sub> |
| 23.21                | CH <sub>2</sub> |
| 23.11                | CH <sub>2</sub> |
| 23.01                | CH <sub>2</sub> |
| 22.91                | CH <sub>2</sub> |
| 22.81                | CH <sub>2</sub> |
| 22.71                | CH <sub>2</sub> |
| 22.61                | CH <sub>2</sub> |
| 22.51                | CH <sub>2</sub> |
| 22.41                | CH <sub>2</sub> |
| 22.31                | CH <sub>2</sub> |
| 22.21                | CH <sub>2</sub> |
| 22.11                | CH <sub>2</sub> |
| 22.01                | CH <sub>2</sub> |
| 21.91                | CH <sub>2</sub> |
| 21.81                | CH <sub>2</sub> |
| 21.71                | CH <sub>2</sub> |
| 21.61                | CH <sub>2</sub> |
| 21.51                | CH <sub>2</sub> |
| 21.41                | CH <sub>2</sub> |
| 21.31                | CH <sub>2</sub> |
| 21.21                | CH <sub>2</sub> |
| 21.11                | CH <sub>2</sub> |
| 21.01                | CH <sub>2</sub> |
| 20.91                | CH <sub>2</sub> |
| 20.81                | CH <sub>2</sub> |
| 20.71                | CH <sub>2</sub> |
| 20.61                | CH <sub>2</sub> |
| 20.51                | CH <sub>2</sub> |
| 20.41                | CH <sub>2</sub> |
| 20.31                | CH <sub>2</sub> |
| 20.21                | CH <sub>2</sub> |
| 20.11                | CH <sub>2</sub> |
| 20.01                | CH <sub>2</sub> |
| 19.91                | CH <sub>2</sub> |
| 19.81                | CH <sub>2</sub> |
| 19.71                | CH <sub>2</sub> |
| 19.61                | CH <sub>2</sub> |
| 19.51                | CH <sub>2</sub> |
| 19.41                | CH <sub>2</sub> |
| 19.31                | CH <sub>2</sub> |
| 19.21                | CH <sub>2</sub> |
| 19.11                | CH <sub>2</sub> |
| 19.01                | CH <sub>2</sub> |
| 18.91                | CH <sub>2</sub> |
| 18.81                | CH <sub>2</sub> |
| 18.71                | CH <sub>2</sub> |
| 18.61                | CH <sub>2</sub> |
| 18.51                | CH <sub>2</sub> |
| 18.41                | CH <sub>2</sub> |
| 18.31                | CH <sub>2</sub> |
| 18.21                | CH <sub>2</sub> |
| 18.11                | CH <sub>2</sub> |
| 18.01                | CH <sub>2</sub> |
| 17.91                | CH <sub>2</sub> |
| 17.81                | CH <sub>2</sub> |
| 17.71                | CH <sub>2</sub> |
| 17.61                | CH <sub>2</sub> |
| 17.51                | CH <sub>2</sub> |
| 17.41                | CH <sub>2</sub> |
| 17.31                | CH <sub>2</sub> |
| 17.21                | CH <sub>2</sub> |
| 17.11                | CH <sub>2</sub> |
| 17.01                | CH <sub>2</sub> |
| 16.91                | CH <sub>2</sub> |
| 16.81                | CH <sub>2</sub> |
| 16.71                | CH <sub>2</sub> |
| 16.61                | CH <sub>2</sub> |
| 16.51                | CH <sub>2</sub> |
| 16.41                | CH <sub>2</sub> |
| 16.31                | CH <sub>2</sub> |
| 16.21                | CH <sub>2</sub> |
| 16.11                | CH <sub>2</sub> |
| 16.01                | CH <sub>2</sub> |
| 15.91                | CH <sub>2</sub> |
| 15.81                | CH <sub>2</sub> |
| 15.71                | CH <sub>2</sub> |
| 15.61                | CH <sub>2</sub> |
| 15.51                | CH <sub>2</sub> |
| 15.41                | CH <sub>2</sub> |
| 15.31                | CH <sub>2</sub> |
| 15.21                | CH <sub>2</sub> |
| 15.11                | CH <sub>2</sub> |
| 15.01                | CH <sub>2</sub> |
| 14.91                | CH <sub>2</sub> |
| 14.81                | CH <sub>2</sub> |
| 14.71                | CH <sub>2</sub> |
| 14.61                | CH <sub>2</sub> |
| 14.51                | CH <sub>2</sub> |
| 14.41                | CH <sub>2</sub> |
| 14.31                | CH <sub>2</sub> |
| 14.21                | CH <sub>2</sub> |
| 14.11                | CH <sub>2</sub> |
| 14.01                | CH <sub>2</sub> |
| 13.91                | CH <sub>2</sub> |
| 13.81                | CH <sub>2</sub> |
| 13.71                | CH <sub>2</sub> |
| 13.61                | CH <sub>2</sub> |
| 13.51                | CH <sub>2</sub> |
| 13.41                | CH <sub>2</sub> |
| 13.31                | CH <sub>2</sub> |
| 13.21                | CH <sub>2</sub> |
| 13.11                | CH <sub>2</sub> |
| 13.01                | CH <sub>2</sub> |
| 12.91                | CH <sub>2</sub> |
| 12.81                | CH <sub>2</sub> |
| 12.71                | CH <sub>2</sub> |
| 12.61                | CH <sub>2</sub> |
| 12.51                | CH <sub>2</sub> |
| 12.41                | CH <sub>2</sub> |
| 12.31                | CH <sub>2</sub> |
| 12.21                | CH <sub>2</sub> |
| 12.11                | CH <sub>2</sub> |
| 12.01                | CH <sub>2</sub> |
| 11.91                | CH <sub>2</sub> |
| 11.81                | CH <sub>2</sub> |
| 11.71                | CH <sub>2</sub> |
| 11.61                | CH <sub>2</sub> |
| 11.51                | CH <sub>2</sub> |
| 11.41                | CH <sub>2</sub> |
| 11.31                | CH <sub>2</sub> |
| 11.21                | CH <sub>2</sub> |
| 11.11                | CH <sub>2</sub> |
| 11.01                | CH <sub>2</sub> |
| 10.91                | CH <sub>2</sub> |
| 10.81                | CH <sub>2</sub> |
| 10.71                | CH <sub>2</sub> |
| 10.61                | CH <sub>2</sub> |
| 10.51                | CH <sub>2</sub> |
| 10.41                | CH <sub>2</sub> |
| 10.31                | CH <sub>2</sub> |
| 10.21                | CH <sub>2</sub> |
| 10.11                | CH <sub>2</sub> |
| 10.01                | CH <sub>2</sub> |
| 9.91                 | CH <sub>2</sub> |
| 9.81                 | CH <sub>2</sub> |
| 9.71                 | CH <sub>2</sub> |
| 9.61                 | CH <sub>2</sub> |
| 9.51                 | CH <sub>2</sub> |
| 9.41                 | CH <sub>2</sub> |
| 9.31                 | CH <sub>2</sub> |
| 9.21                 | CH <sub>2</sub> |
| 9.11                 | CH <sub>2</sub> |
| 9.01                 | CH <sub>2</sub> |
| 8.91                 | CH <sub>2</sub> |
| 8.81                 | CH <sub>2</sub> |
| 8.71                 | CH <sub>2</sub> |
| 8.61                 | CH <sub>2</sub> |
| 8.51                 | CH <sub>2</sub> |
| 8.41                 | CH <sub>2</sub> |
| 8.31                 | CH <sub>2</sub> |
| 8.21                 | CH <sub>2</sub> |
| 8.11                 | CH <sub>2</sub> |
| 8.01                 | CH <sub>2</sub> |
| 7.91                 | CH <sub>2</sub> |
| 7.81                 | CH <sub>2</sub> |
| 7.71                 | CH <sub>2</sub> |
| 7.61                 | CH <sub>2</sub> |
| 7.51                 | CH <sub>2</sub> |
| 7.41                 | CH <sub>2</sub> |
| 7.31                 | CH <sub>2</sub> |
| 7.21                 | CH <sub>2</sub> |
| 7.11                 | CH <sub>2</sub> |
| 7.01                 | CH <sub>2</sub> |
| 6.91                 | CH <sub>2</sub> |
| 6.81                 | CH <sub>2</sub> |
| 6.71                 | CH <sub>2</sub> |
| 6.61                 | CH <sub>2</sub> |
| 6.51                 | CH <sub>2</sub> |
| 6.41                 | CH <sub>2</sub> |
| 6.31                 | CH <sub>2</sub> |
| 6.21                 | CH <sub>2</sub> |
| 6.11                 | CH <sub>2</sub> |
| 6.01                 | CH <sub>2</sub> |
| 5.91                 | CH <sub>2</sub> |
| 5.81                 | CH <sub>2</sub> |
| 5.71                 | CH <sub>2</sub> |
| 5.61                 | CH <sub>2</sub> |
| 5.51                 | CH <sub>2</sub> |
| 5.41                 | CH <sub>2</sub> |
| 5.31                 | CH <sub>2</sub> |
| 5.21                 | CH <sub>2</sub> |
| 5.11                 | CH <sub>2</sub> |
| 5.01                 | CH <sub>2</sub> |
| 4.91                 | CH <sub>2</sub> |
| 4.81                 | CH <sub>2</sub> |
| 4.71                 | CH <sub>2</sub> |
| 4.61                 | CH <sub>2</sub> |
| 4.51                 | CH <sub>2</sub> |
| 4.41                 | CH <sub>2</sub> |
| 4.31                 | CH <sub>2</sub> |
| 4.21                 | CH <sub>2</sub> |
| 4.11                 | CH <sub>2</sub> |
| 4.01                 | CH <sub>2</sub> |
| 3.91                 | CH <sub>2</sub> |
| 3.81                 | CH <sub>2</sub> |
| 3.71                 | CH <sub>2</sub> |
| 3.61                 | CH <sub>2</sub> |
| 3.51                 | CH <sub>2</sub> |
| 3.41                 | CH <sub>2</sub> |
| 3.31                 | CH <sub>2</sub> |
| 3.21                 | CH <sub>2</sub> |
| 3.11                 | CH <sub>2</sub> |
| 3.01                 | CH <sub>2</sub> |
| 2.91                 | CH <sub>2</sub> |
| 2.81                 | CH <sub>2</sub> |
| 2.71                 | CH <sub>2</sub> |
| 2.61                 | CH <sub>2</sub> |
| 2.51                 | CH <sub>2</sub> |
| 2.41                 | CH <sub>2</sub> |
| 2.31                 | CH <sub>2</sub> |
| 2.21                 | CH <sub>2</sub> |
| 2.11                 | CH <sub>2</sub> |
| 2.01                 | CH <sub>2</sub> |
| 1.91                 | CH <sub>2</sub> |
| 1.81                 | CH <sub>2</sub> |
| 1.71                 | CH <sub>2</sub> |
| 1.61                 | CH <sub>2</sub> |
| 1.51                 | CH <sub>2</sub> |
| 1.41                 | CH <sub>2</sub> |
| 1.31                 | CH <sub>2</sub> |
| 1.21                 | CH <sub>2</sub> |
| 1.11                 | CH <sub>2</sub> |
| 1.01                 | CH <sub>2</sub> |
| 0.91                 | CH <sub>2</sub> |
| 0.81                 | CH <sub>2</sub> |
| 0.71                 | CH <sub>2</sub> |
| 0.61                 | CH <sub>2</sub> |
| 0.51                 | CH <sub>2</sub> |
| 0.41                 | CH <sub>2</sub> |
| 0.31                 | CH <sub>2</sub> |
| 0.21                 | CH <sub>2</sub> |
| 0.11                 | CH <sub>2</sub> |
| 0.01                 | CH <sub>2</sub> |
