# Supplementary material for: In vitro and computational investigations of novel synthetic carboxamide-linked pyridopyrrolopyrimidines with potent activity as SARS-CoV-2-MPro inhibitors
Source: PubMed Central journal article supplement — RSC Adv. 2022 Sep 22;12(41):26895–907. doi: 10.1039/d2ra04015h (PMC9494209; doi:10.1039/d2ra04015h), 2022-09-22
Supplement: RA-012-D2RA04015H-s007.pdf [file RA-012-D2RA04015H-s007.pdf]

4a

Agilent 1100 LC/MSD  
 Diodearray G1315B (DAD1A-215nm; DAD1B-240nm)  
 Mass Quad G1956B (MSD1-Pos, MSD2-Neg)  
 ELSD Altech 3300 (ADC1 A, ELSD)

Mobile Phase:A-H<sub>2</sub>O+0.1HCOOH;B-MeCN+0.1HCOOH  
 Separation column:  
 Rapid Resolutionn HT Cartige 4.6x30mm,  
 1.8-Micron, Zorbax SB-C18

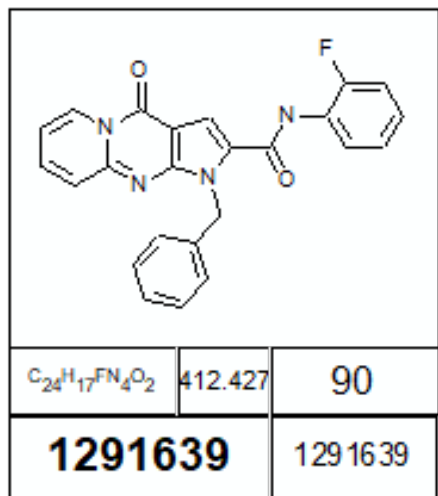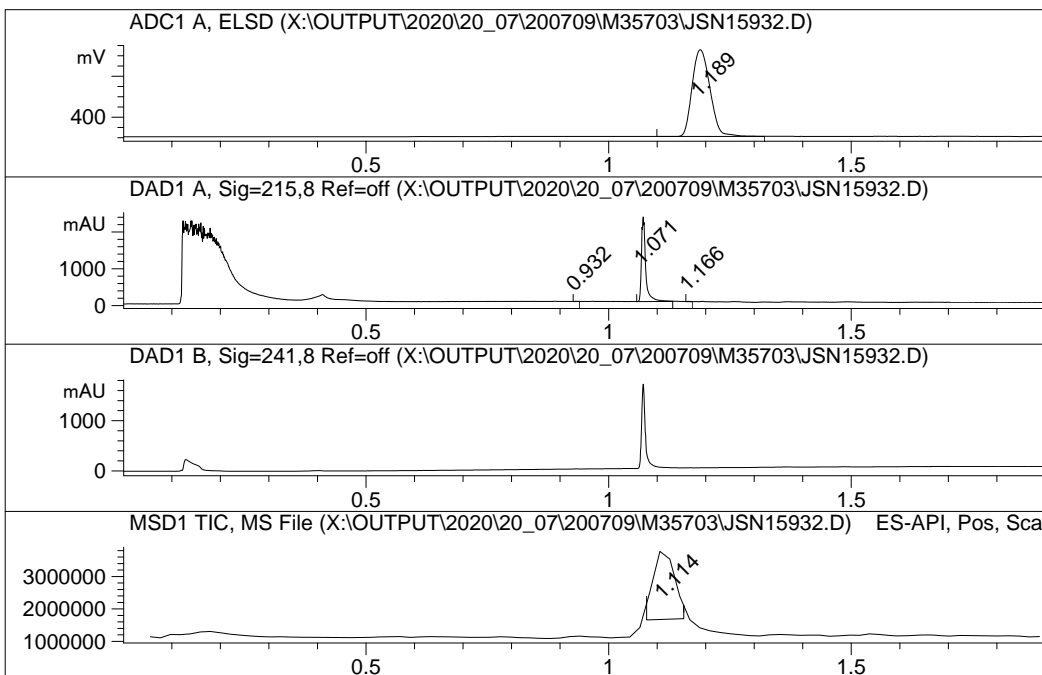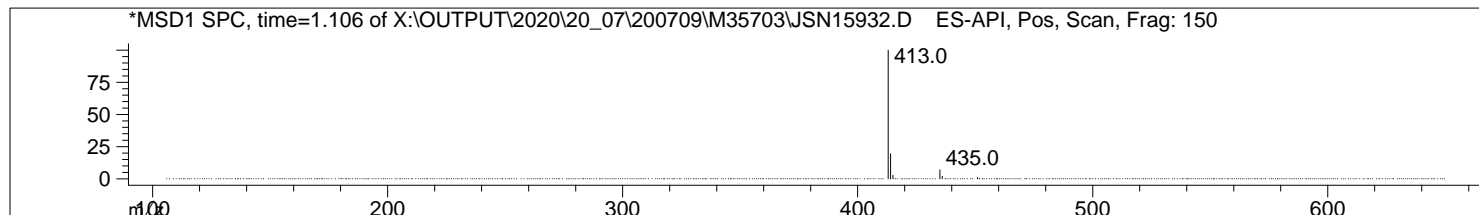

| # | Signal                    | R.Time | Area %  |
|---|---------------------------|--------|---------|
| 1 | ADC1 A, ELSD              | 1.189  | 100.000 |
| # | Signal                    | R.Time | Area %  |
| 1 | DAD1 A, Sig=215,8 Ref=off | 0.932  | 0.211   |
| 2 |                           | 1.071  | 99.443  |
| 3 |                           | 1.166  | 0.346   |
| # | Signal                    | R.Time | Area %  |
| # | Signal                    | R.Time | Area %  |
| 1 | MSD1 TIC, MS File         | 1.114  | 100.000 |

4b

Agilent 1100 LC/MSD  
 Diodearray G1315B (DAD1A-215nm; DAD1B-240nm)  
 Mass Quad G1956B (MSD1-Pos, MSD2-Neg)  
 ELSD Altech 3300 (ADC1 A, ELSD)

Mobile Phase:A-H<sub>2</sub>O+0.1HCOOH;B-MeCN+0.1HCOOH  
 Separation column:  
 Rapid Resolutionn HT Cartige 4.6x30mm,  
 1.8-Micron, Zorbax SB-C18

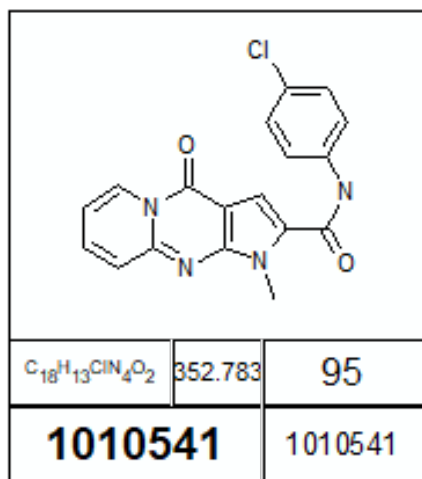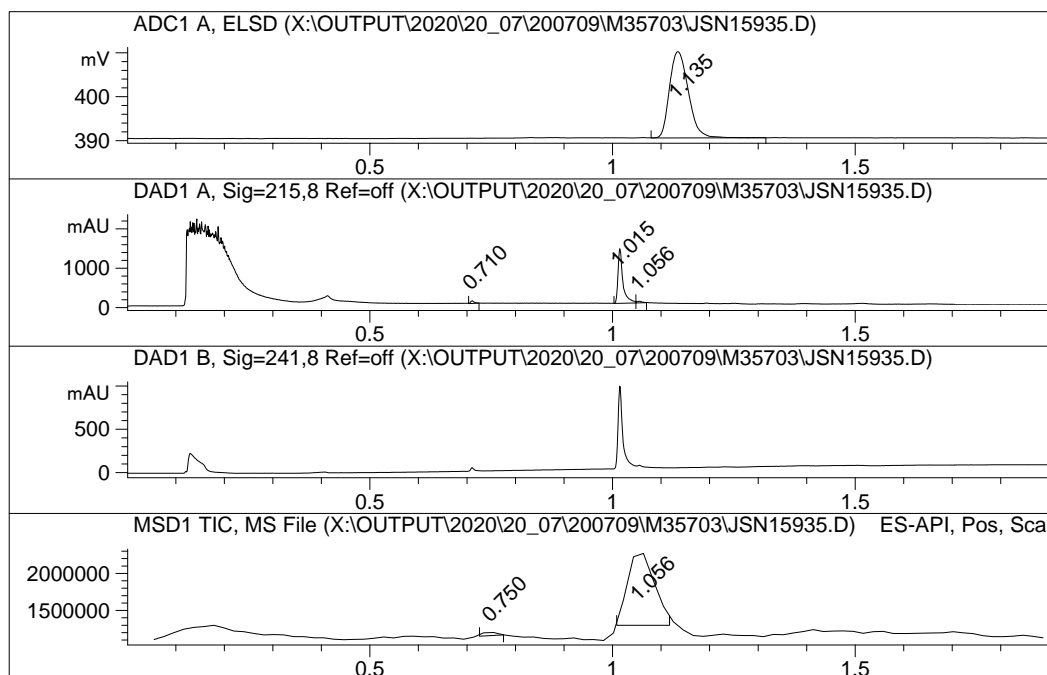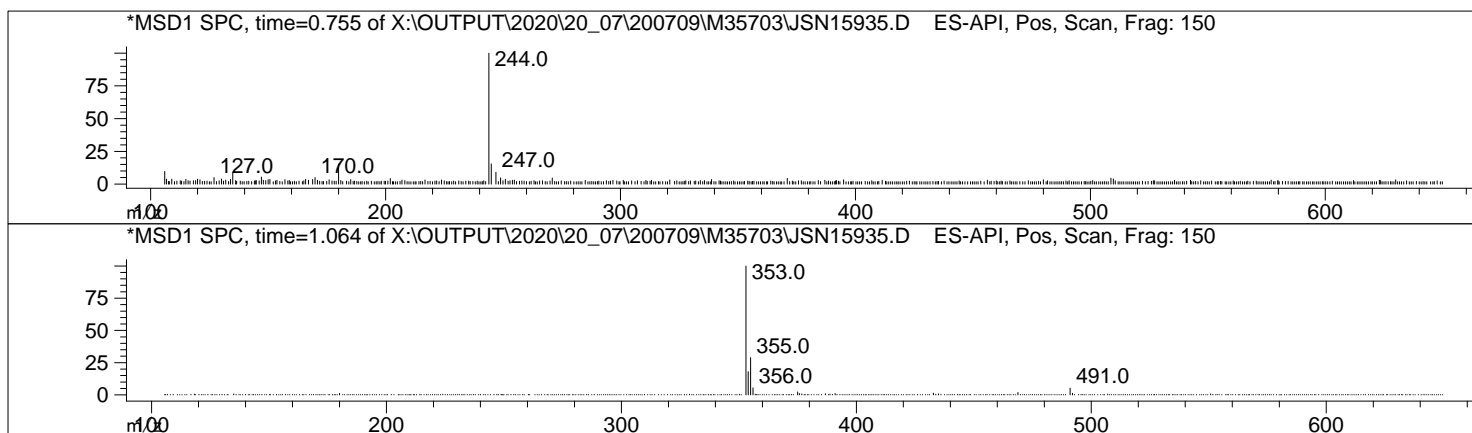

| # | Signal       | R.Time | Area %  |
|---|--------------|--------|---------|
| 1 | ADC1 A, ELSD | 1.135  | 100.000 |

| # | Signal                    | R.Time | Area % |
|---|---------------------------|--------|--------|
| 1 | DAD1 A, Sig=215,8 Ref=off | 0.710  | 3.154  |
| 2 |                           | 1.015  | 93.750 |
| 3 |                           | 1.056  | 3.096  |

| # | Signal            | R.Time | Area % |
|---|-------------------|--------|--------|
| 1 | MSD1 TIC, MS File | 0.750  | 1.834  |
| 2 |                   | 1.056  | 98.166 |

4c

Agilent 1100 LC/MSD  
 Diodearray G1315B (DAD1A-215nm; DAD1B-240nm)  
 Mass Quad G1956B (MSD1-Pos, MSD2-Neg)  
 ELSD Altech 3300 (ADC1 A, ELSD)

Mobile Phase:A-H2O+0.1HCOOH;B-MeCN+0.1HCOOH  
 Separation column:  
 Rapid Resolutionn HT Cartige 4.6x30mm,  
 1.8-Micron, Zorbax SB-C18

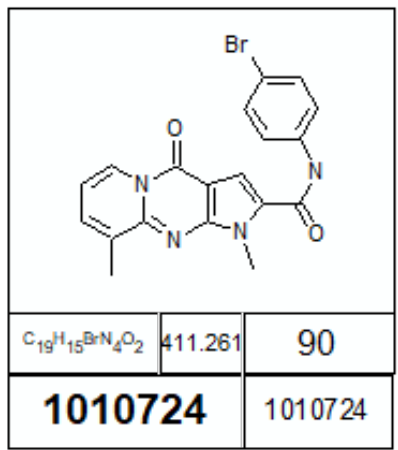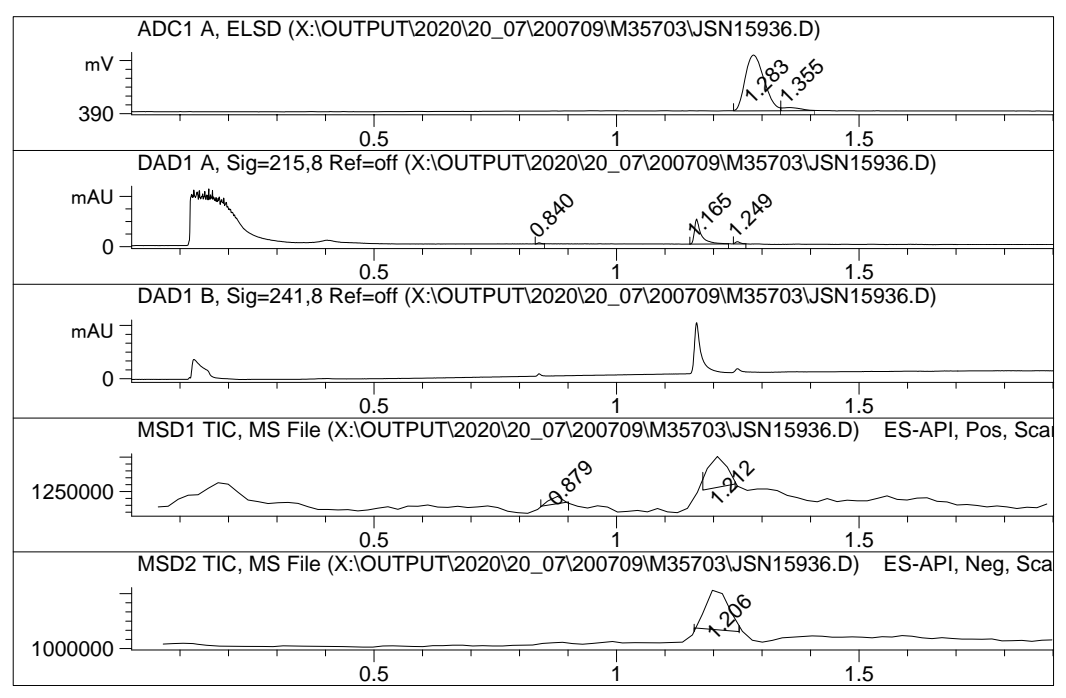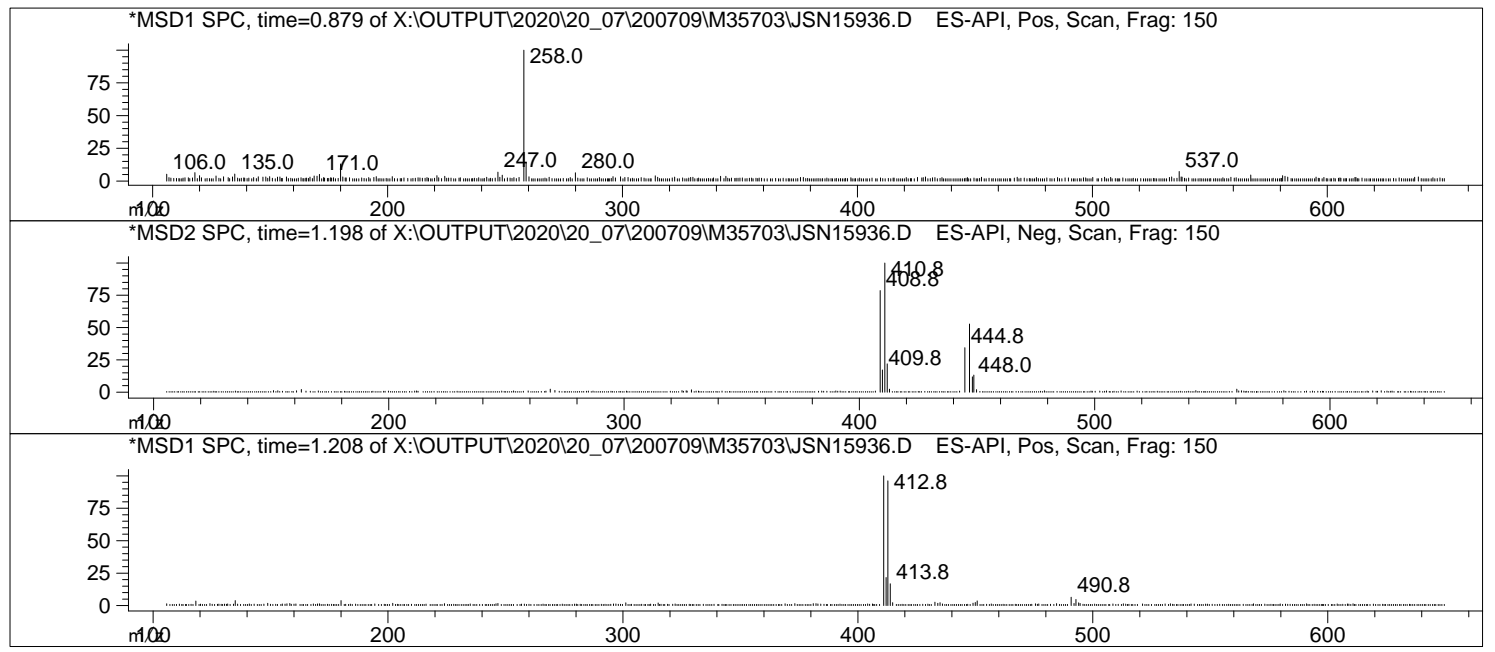

| #     | Signal                    | R.Time | Area % |
|-------|---------------------------|--------|--------|
| 1     | ADC1 A, ELSD              | 1.283  | 94.897 |
| 2     |                           | 1.355  | 5.103  |
| ----- |                           |        |        |
| #     | Signal                    | R.Time | Area % |
| 1     | DAD1 A, Sig=215,8 Ref=off | 0.840  | 2.322  |
| 2     |                           | 1.165  | 92.006 |
| 3     |                           | 1.249  | 5.671  |
| ----- |                           |        |        |
| #     | Signal                    | R.Time | Area % |

| # | Signal            | R.Time | Area % |
|---|-------------------|--------|--------|
| 1 | MSD1 TIC, MS File | 0.879  | 13.288 |
| 2 |                   | 1.212  | 86.712 |

  

| # | Signal            | R.Time | Area %  |
|---|-------------------|--------|---------|
| 1 | MSD2 TIC, MS File | 1.206  | 100.000 |

4d

Agilent 1100 LC/MSD  
 Diodearray G1315B (DAD1A-215nm; DAD1B-240nm)  
 Mass Quad G1956B (MSD1-Pos, MSD2-Neg)  
 ELSD Altech 3300 (ADC1 A, ELSD)

Mobile Phase:A-H<sub>2</sub>O+0.1HCOOH;B-MeCN+0.1HCOOH  
 Separation column:  
 Rapid Resolutionn HT Cartige 4.6x30mm,  
 1.8-Micron, Zorbax SB-C18

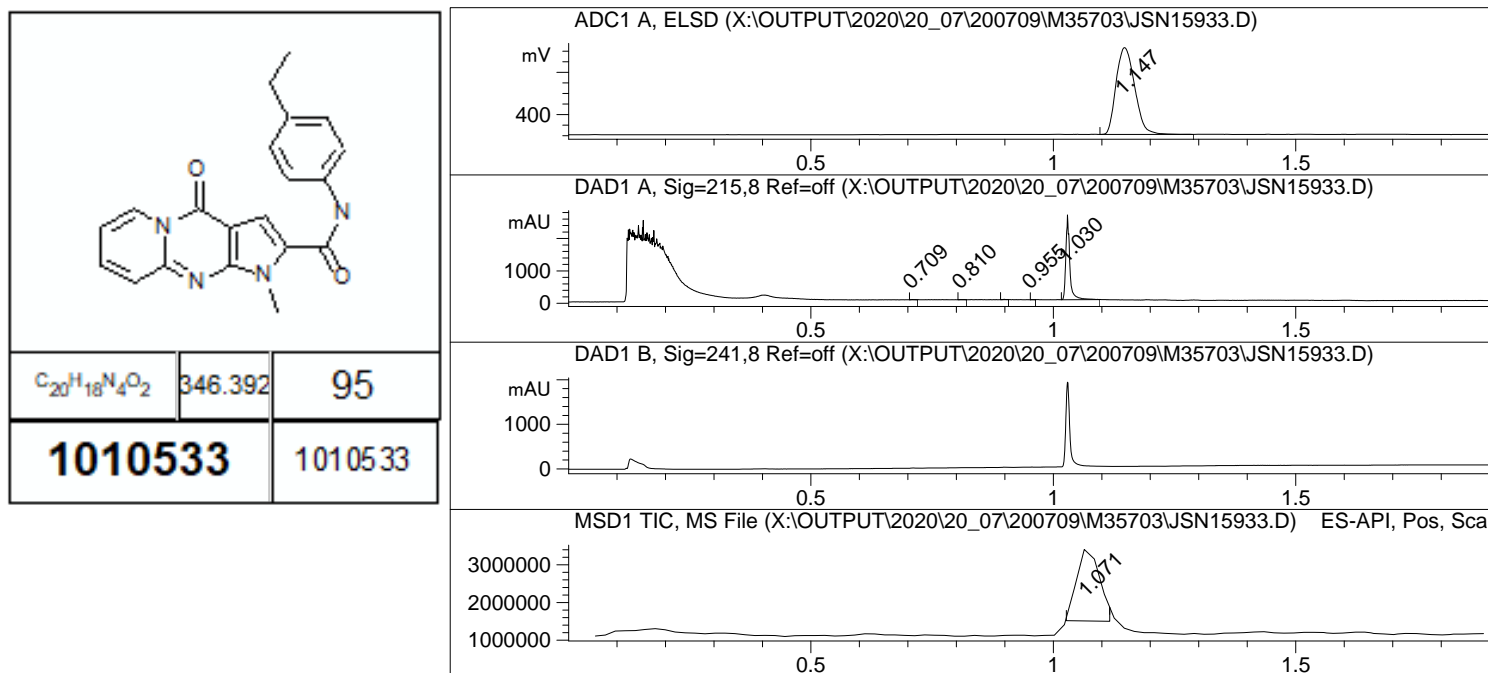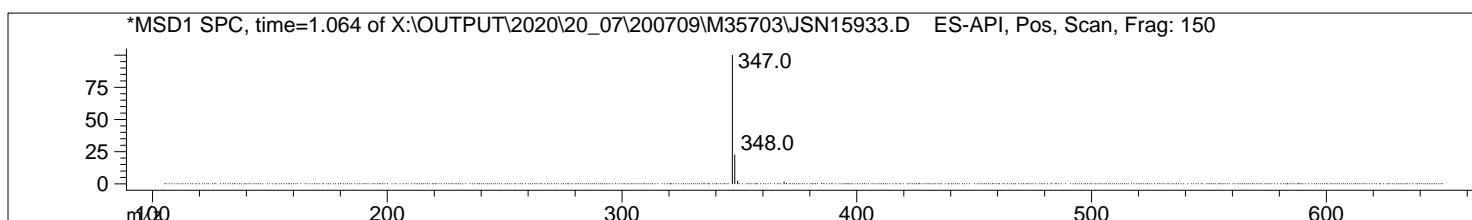

| # | Signal                    | R.Time | Area %  |
|---|---------------------------|--------|---------|
| 1 | ADC1 A, ELSD              | 1.147  | 100.000 |
| # | Signal                    | R.Time | Area %  |
| 1 | DAD1 A, Sig=215,8 Ref=off | 0.709  | 0.341   |
| 2 |                           | 0.810  | 0.169   |
| 3 |                           | 0.899  | 0.269   |
| 4 |                           | 0.955  | 0.163   |
| 5 |                           | 1.030  | 99.059  |
| # | Signal                    | R.Time | Area %  |
| 1 | MSD1 TIC, MS File         | 1.071  | 100.000 |

4e

Mobile phase:A-H<sub>2</sub>O+0.1%HCOOH;B-MeCN+0.1%HCOOH

System: Agilent 1100 LC/MSD SL

Separation column:

Detector: Diodearray G1315B (DAD1)

Rapid Resolutionn HT Cartige 4.6x30mm,

MassQuad G1956B (MSD1-Pos, MSD2-Neg)

1.8-Micron, Zorbax SB C-18

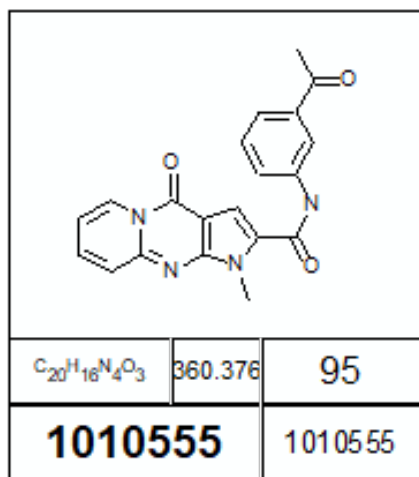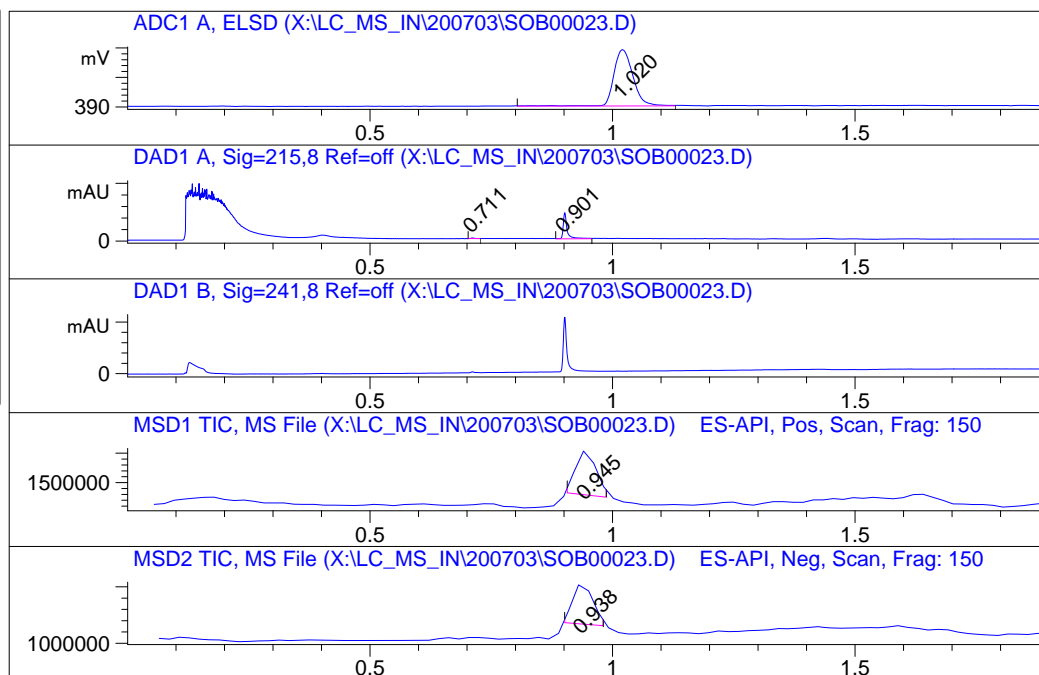

Block:

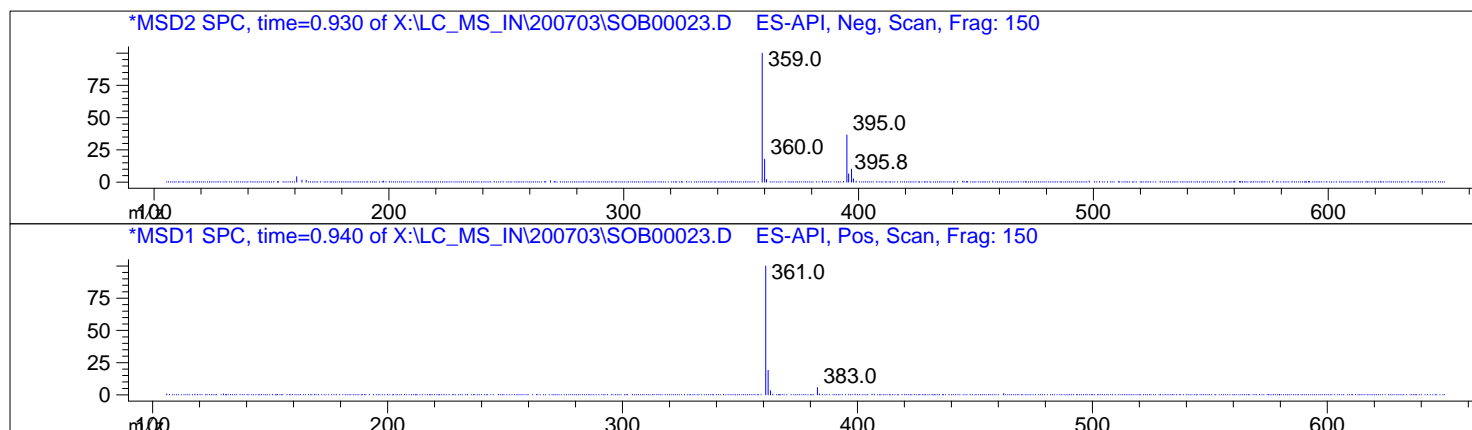

| # | Signal                    | R.Time | Area %  |
|---|---------------------------|--------|---------|
| 1 | ADC1 A, ELSD              | 1.020  | 100.000 |
| # | Signal                    | R.Time | Area %  |
| 1 | DAD1 A, Sig=215,8 Ref=off | 0.711  | 2.270   |
| 2 |                           | 0.901  | 97.730  |
| # | Signal                    | R.Time | Area %  |
| 1 | MSD1 TIC, MS File         | 0.945  | 100.000 |
| # | Signal                    | R.Time | Area %  |
| 1 | MSD2 TIC, MS File         | 0.938  | 100.000 |

4f

Agilent 1100 LC/MSD  
 Diodearray G1315B (DAD1A-215nm; DAD1B-240nm)  
 Mass Quad G1956B (MSD1-Pos, MSD2-Neg)  
 ELSD Altech 3300 (ADC1 A, ELSD)

Mobile Phase:A-H<sub>2</sub>O+0.1HCOOH;B-MeCN+0.1HCOOH  
 Separation column:  
 Rapid Resolutionn HT Cartige 4.6x30mm,  
 1.8-Micron, Zorbax SB-C18

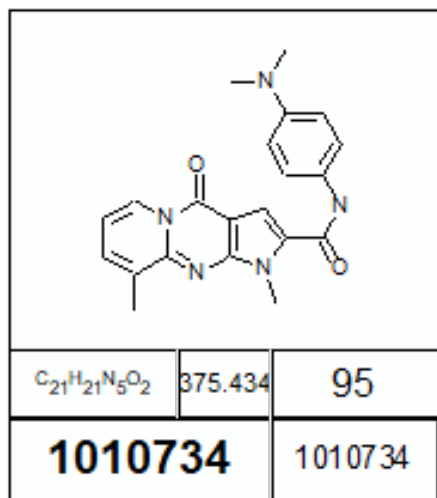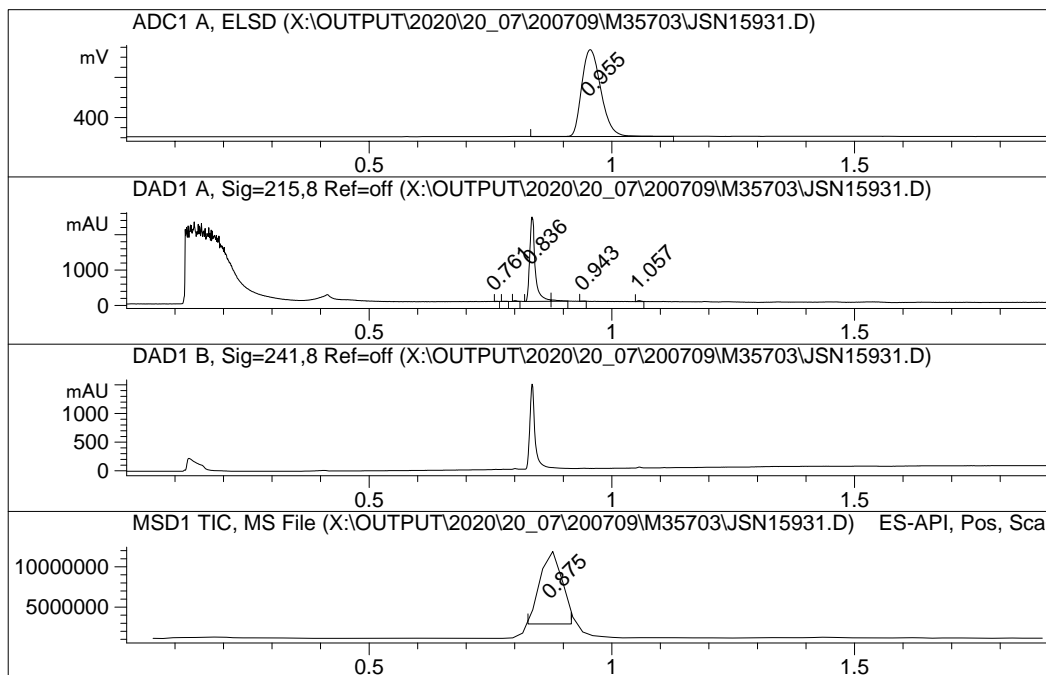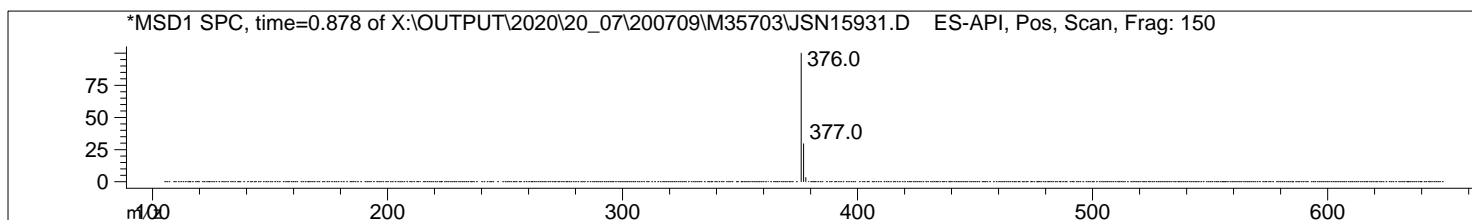

| # | Signal       | R.Time | Area %  |
|---|--------------|--------|---------|
| 1 | ADC1 A, ELSD | 0.955  | 100.000 |

  

| # | Signal                    | R.Time | Area % |
|---|---------------------------|--------|--------|
| 1 | DAD1 A, Sig=215,8 Ref=off | 0.761  | 0.148  |
| 2 |                           | 0.777  | 0.145  |
| 3 |                           | 0.801  | 0.578  |
| 4 |                           | 0.836  | 96.377 |
| 5 |                           | 0.875  | 1.732  |
| 6 |                           | 0.943  | 0.235  |
| 7 |                           | 1.057  | 0.785  |

  

| # | Signal            | R.Time | Area %  |
|---|-------------------|--------|---------|
| 1 | MSD1 TIC, MS File | 0.875  | 100.000 |

4g

Agilent 1100 LC/MSD  
 Diodearray G1315B (DAD1A-215nm; DAD1B-240nm)  
 Mass Quad G1956B (MSD1-Pos, MSD2-Neg)  
 ELSD Altech 3300 (ADC1 A, ELSD)

Mobile Phase:A-H<sub>2</sub>O+0.1HCOOH;B-MeCN+0.1HCOOH  
 Separation column:  
 Rapid Resolutionn HT Cartige 4.6x30mm,  
 1.8-Micron, Zorbax SB-C18

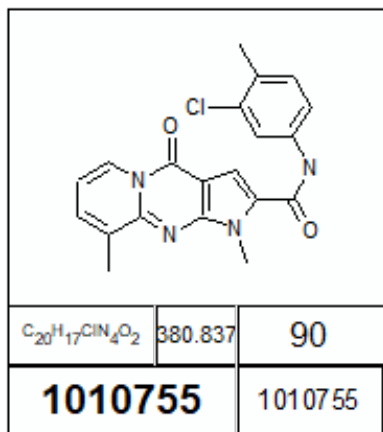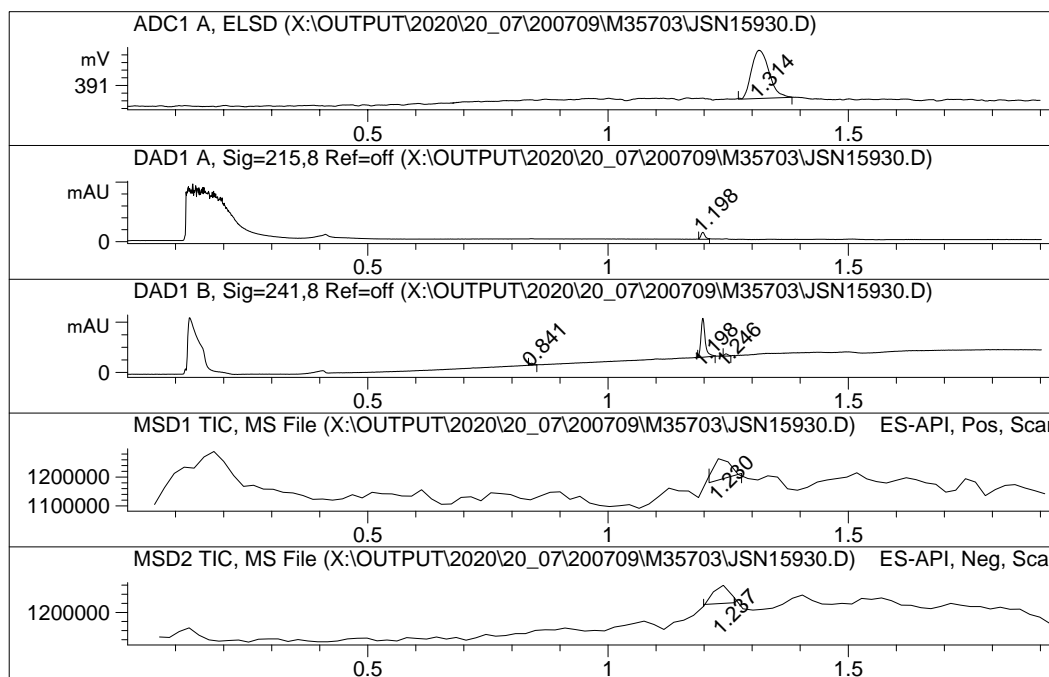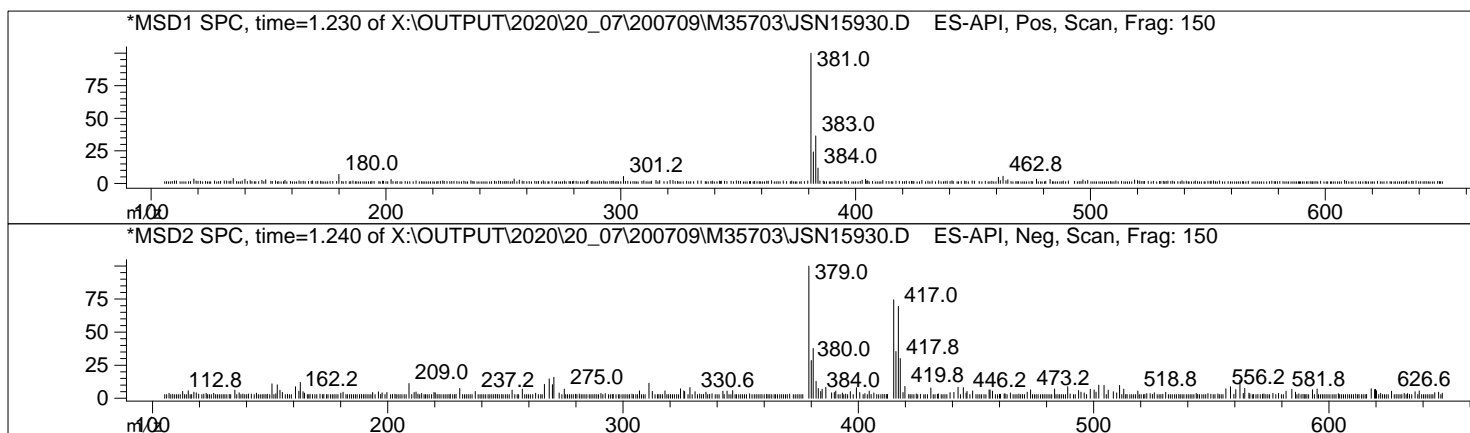

| # | Signal                    | R.Time | Area %  |
|---|---------------------------|--------|---------|
| 1 | ADC1 A, ELSD              | 1.314  | 100.000 |
| # | Signal                    | R.Time | Area %  |
| 1 | DAD1 A, Sig=215,8 Ref=off | 1.198  | 100.000 |
| # | Signal                    | R.Time | Area %  |
| 1 | DAD1 B, Sig=241,8 Ref=off | 0.841  | 3.938   |
| 2 |                           | 1.198  | 91.278  |
| 3 |                           | 1.246  | 4.783   |
| # | Signal                    | R.Time | Area %  |
| 1 | MSD1 TIC, MS File         | 1.230  | 100.000 |
| # | Signal                    | R.Time | Area %  |
| 1 | MSD2 TIC, MS File         | 1.237  | 100.000 |



4h

Agilent 1100 LC/MSD  
 Diodearray G1315B (DAD1A-215nm; DAD1B-240nm)  
 Mass Quad G1956B (MSD1-Pos, MSD2-Neg)  
 ELSD Altech 3300 (ADC1 A, ELSD)

Mobile Phase:A-H<sub>2</sub>O+0.1HCOOH;B-MeCN+0.1HCOOH  
 Separation column:  
 Rapid Resolutionn HT Cartige 4.6x30mm,  
 1.8-Micron, Zorbax SB-C18

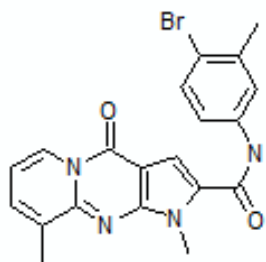

C<sub>20</sub>H<sub>17</sub>BrN<sub>4</sub>O<sub>2</sub> 425.288 90

1010760

1010760

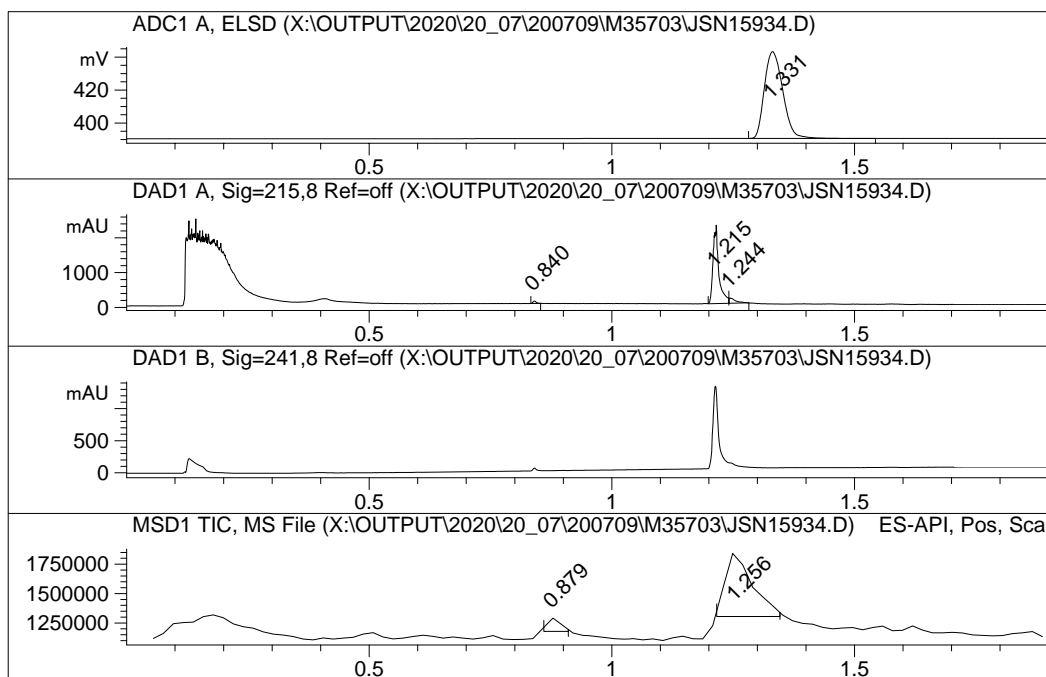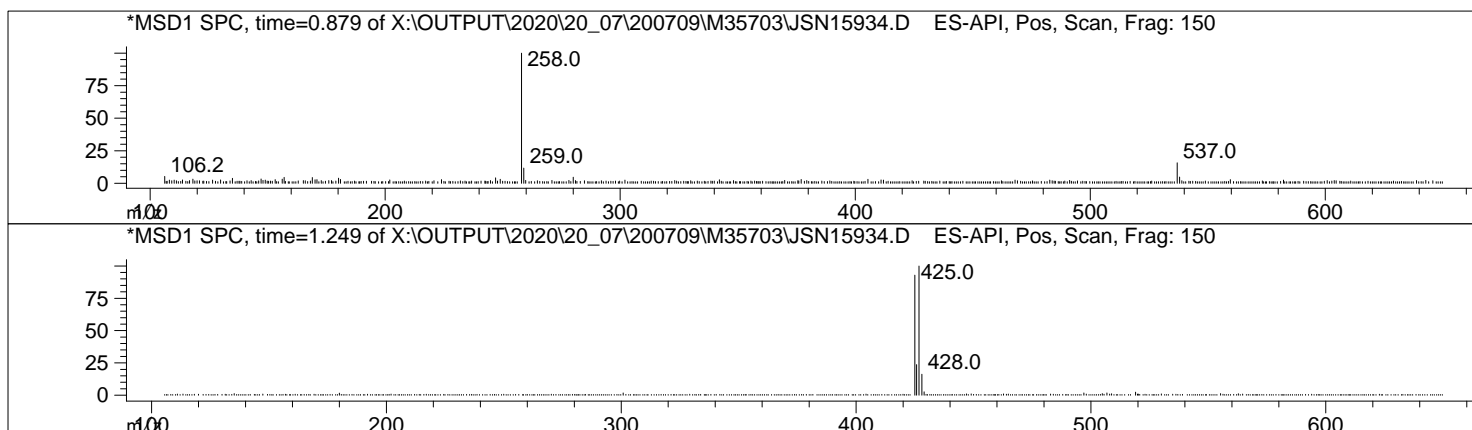

| # | Signal       | R.Time | Area %  |
|---|--------------|--------|---------|
| 1 | ADC1 A, ELSD | 1.331  | 100.000 |

| # | Signal                    | R.Time | Area % |
|---|---------------------------|--------|--------|
| 1 | DAD1 A, Sig=215,8 Ref=off | 0.840  | 1.660  |
| 2 |                           | 1.215  | 91.534 |
| 3 |                           | 1.244  | 6.807  |

| # | Signal            | R.Time | Area % |
|---|-------------------|--------|--------|
| 1 | MSD1 TIC, MS File | 0.879  | 7.049  |
| 2 |                   | 1.256  | 92.951 |

4i

Agilent 1100 LC/MSD  
 Diodearray G1315B (DAD1A-215nm; DAD1B-240nm)  
 Mass Quad G1956B (MSD1-Pos, MSD2-Neg)  
 ELSD Altech 3300 (ADC1 A, ELSD)

Mobile Phase:A-H<sub>2</sub>O+0.1HCOOH;B-MeCN+0.1HCOOH  
 Separation column:  
 Rapid Resolutionn HT Cartige 4.6x30mm,  
 1.8-Micron, Zorbax SB-C18

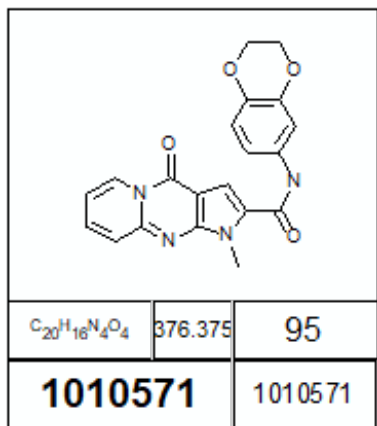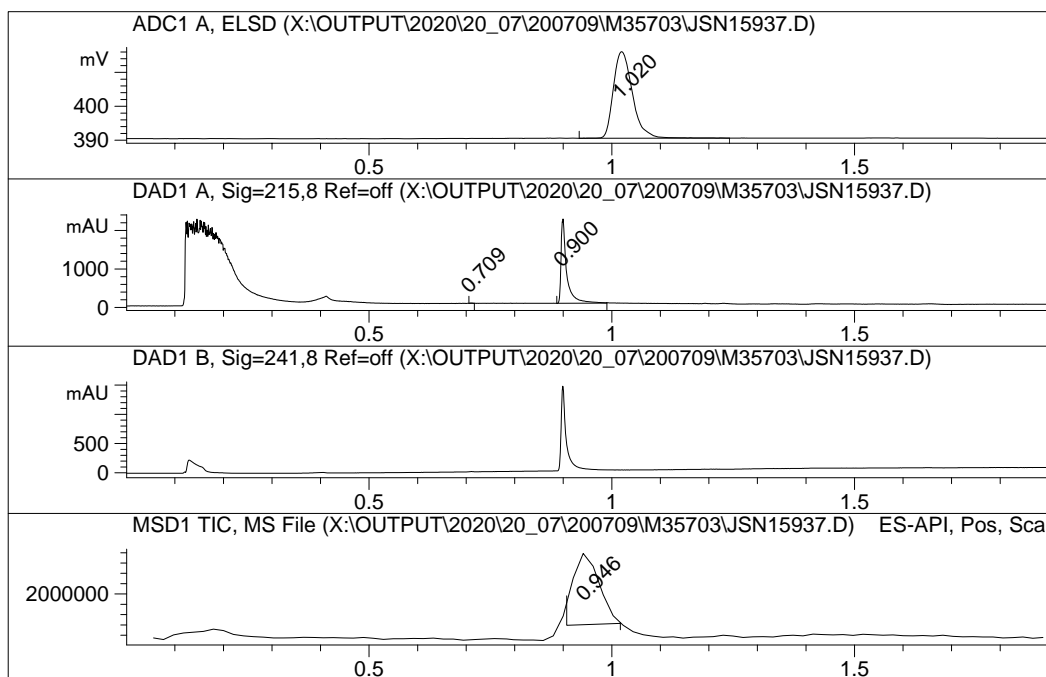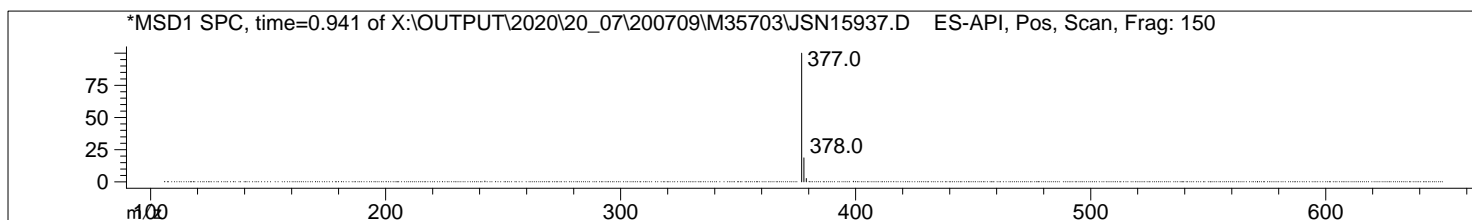

| # | Signal                    | R.Time | Area %  |
|---|---------------------------|--------|---------|
| 1 | ADC1 A, ELSD              | 1.020  | 100.000 |
| # | Signal                    | R.Time | Area %  |
| 1 | DAD1 A, Sig=215,8 Ref=off | 0.709  | 0.169   |
| 2 |                           | 0.900  | 99.831  |
| # | Signal                    | R.Time | Area %  |
| # | Signal                    | R.Time | Area %  |
| 1 | MSD1 TIC, MS File         | 0.946  | 100.000 |
