# Supplementary figures and images for: In vitro and computational investigations of novel synthetic carboxamide-linked pyridopyrrolopyrimidines with potent activity as SARS-CoV-2-MPro inhibitors
Source: PubMed Central journal article supplement — RSC Adv. 2022 Sep 22;12(41):26895–907. doi: 10.1039/d2ra04015h (PMC9494209; doi:10.1039/d2ra04015h), 2022-09-22

NMR 500 MHz Ultra Shield™

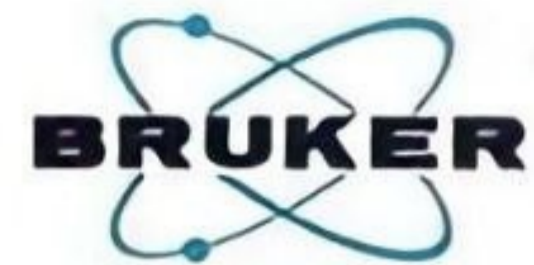

13C (4b)

169.74  
168.17  
162.74  
160.17  
147.24  
144.70  
131.56  
131.11  
130.03  
129.23  
128.60  
128.29  
125.97  
120.37  
116.86  
114.40  
114.03  
103.11  
40.10  
40.01  
39.93  
39.84  
39.76  
39.67  
39.60  
39.51  
39.34  
39.17  
39.01  
37.32

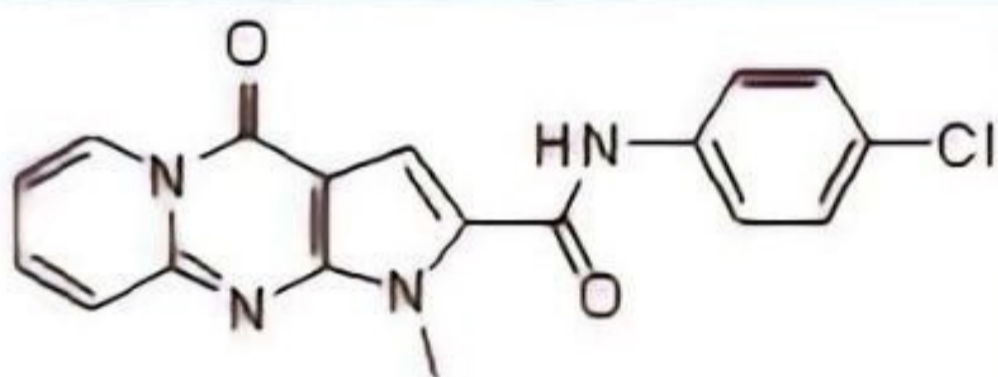

22

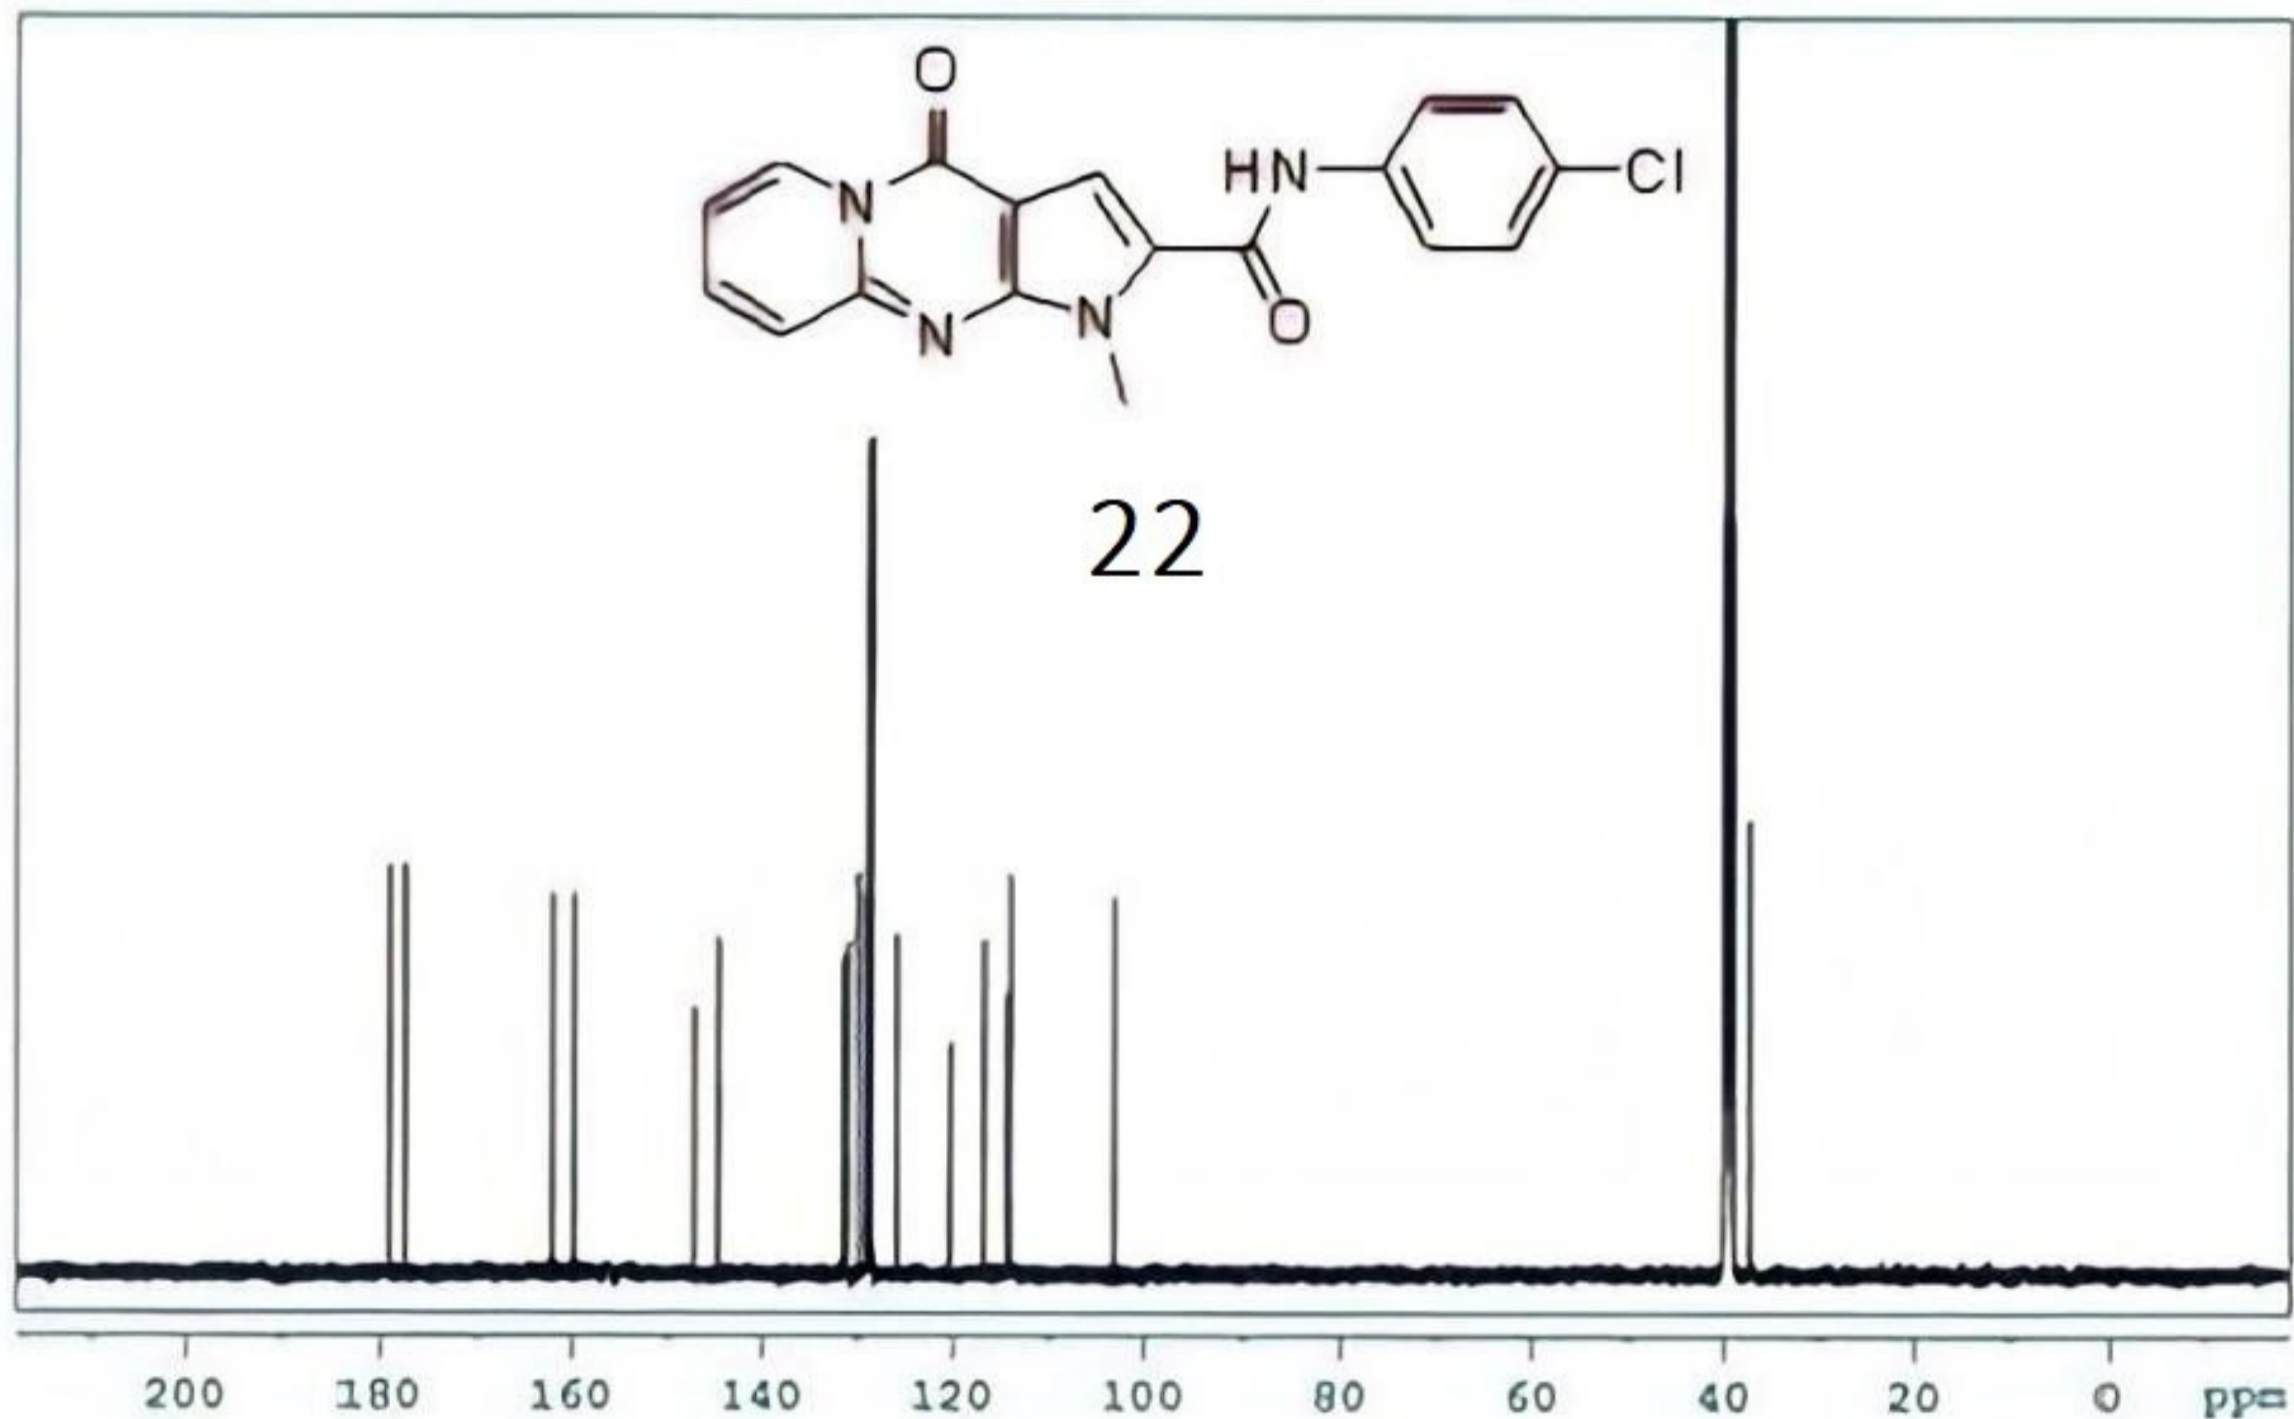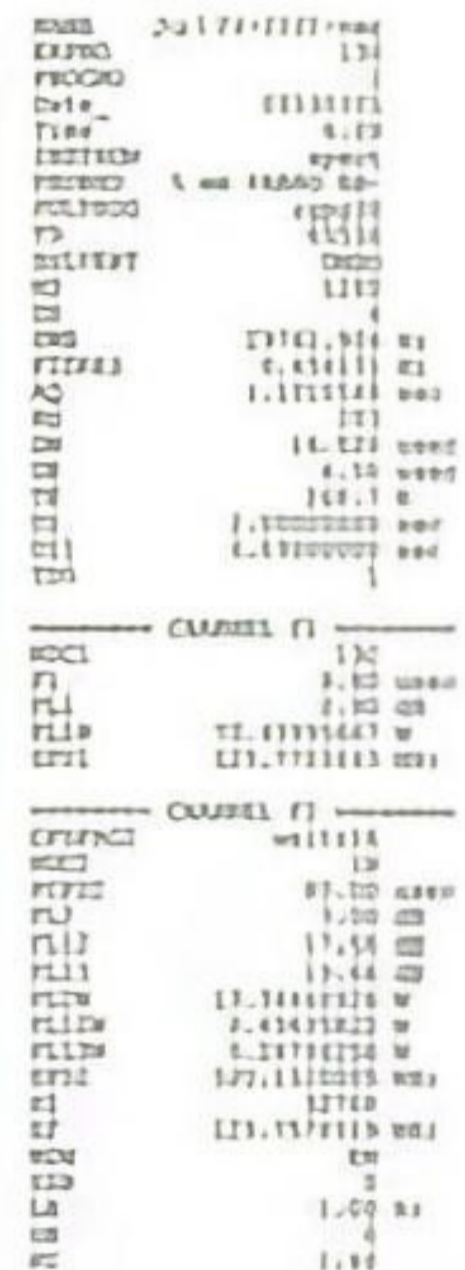

Supplement: RA-012-D2RA04015H-s003.pdf [file RA-012-D2RA04015H-s003.pdf]

100 500 100s Ultra Shield™

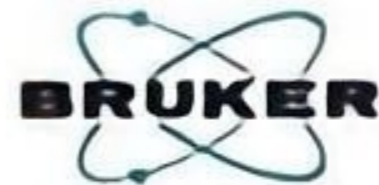

130 (4c)

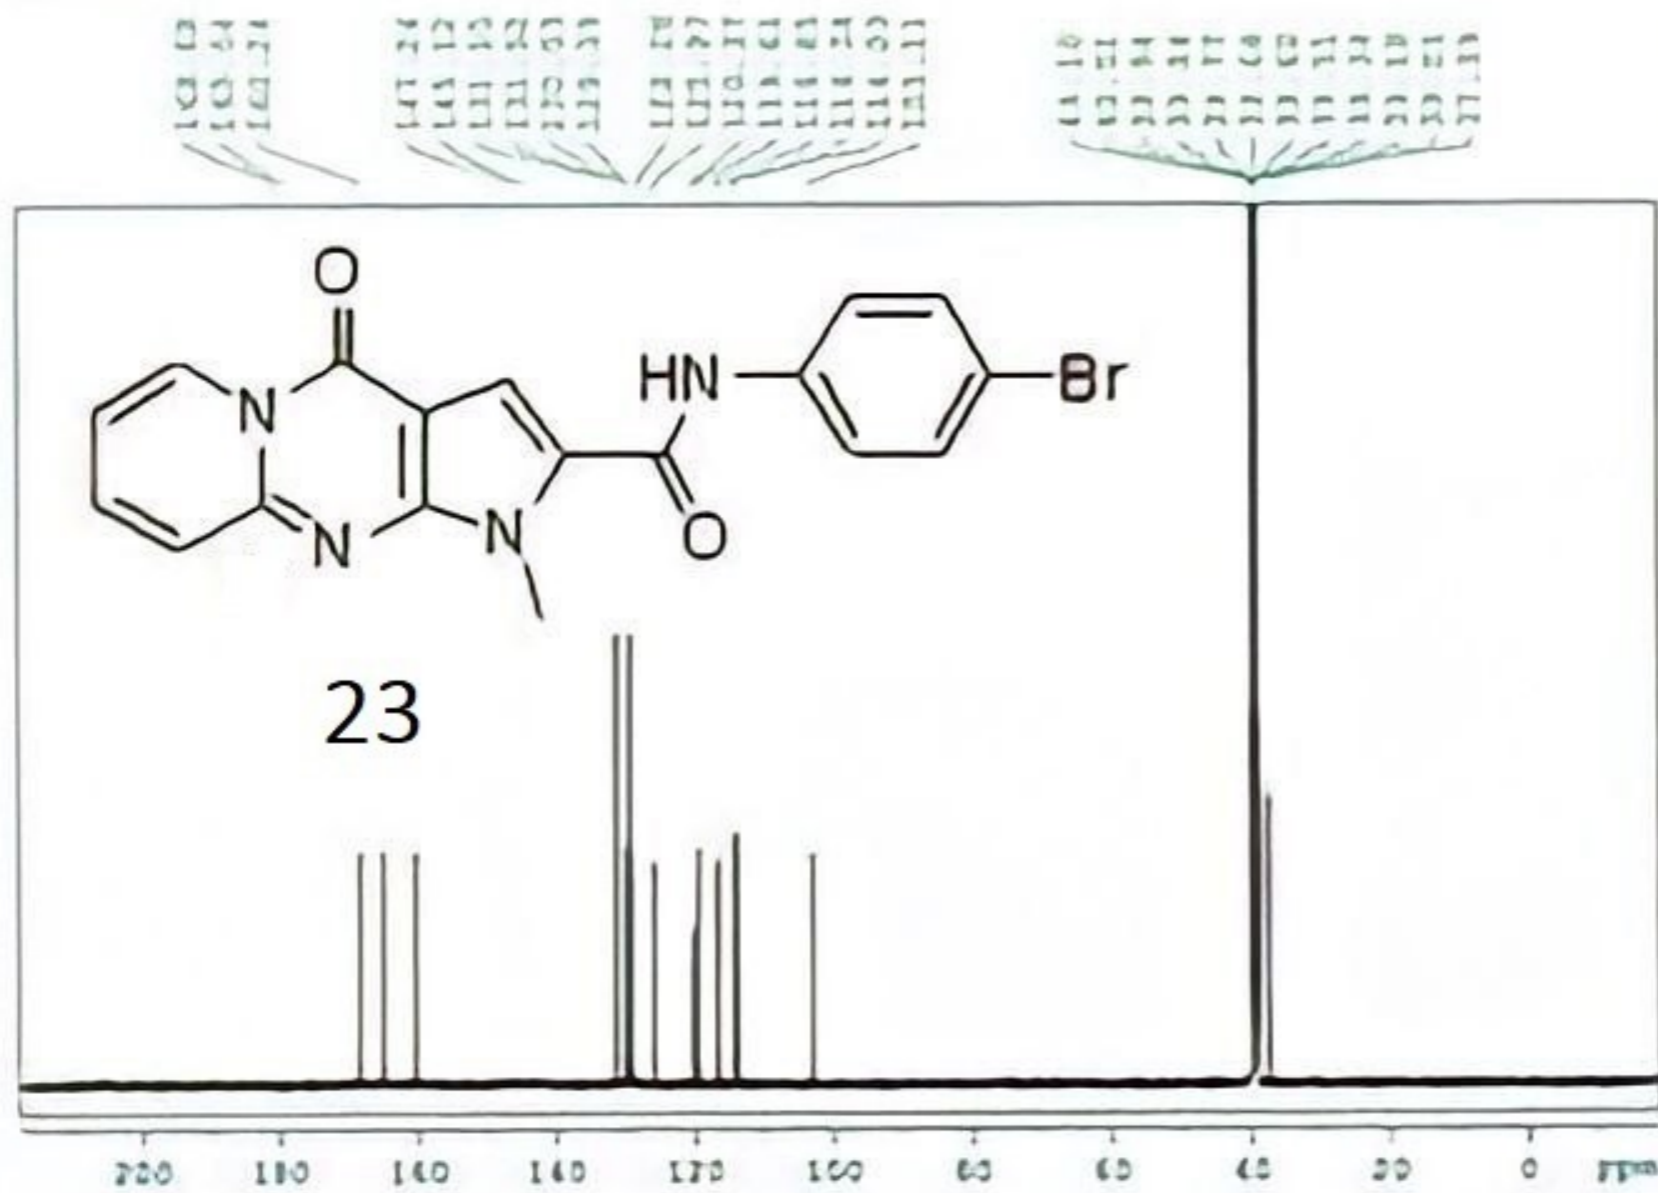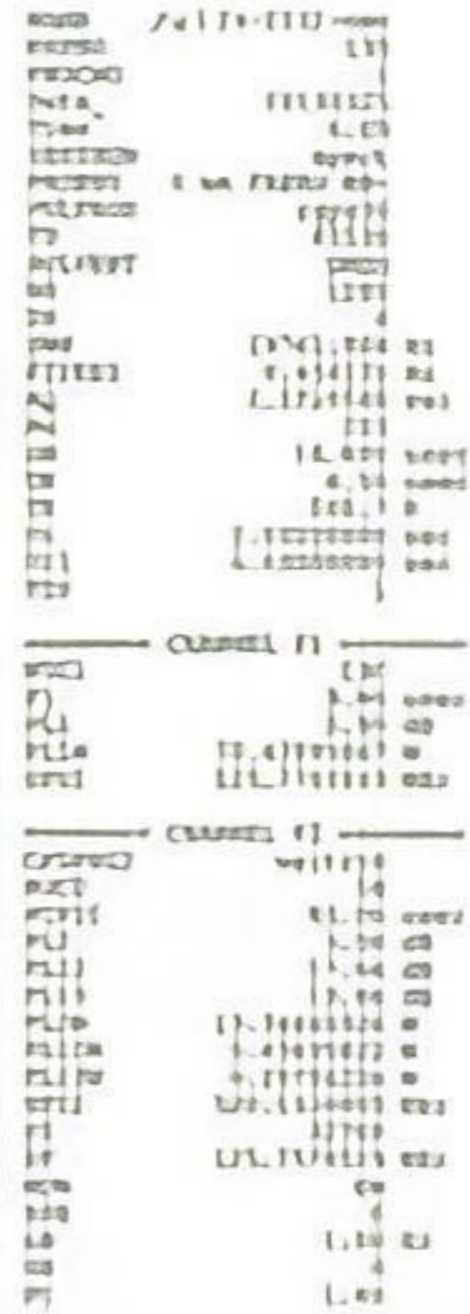

Supplement: RA-012-D2RA04015H-s004.pdf [file RA-012-D2RA04015H-s004.pdf]
